# Supplementary material for: Anti-GM-CSF otilimab versus tofacitinib or placebo in patients with active rheumatoid arthritis and an inadequate response to conventional or biologic DMARDs: two phase 3 randomised trials (contRAst 1 and contRAst 2)
Source: PubMed Central journal article supplement — Ann Rheum Dis. 2023 Sep 12;82(12):1516–26. doi: 10.1136/ard-2023-224482 (PMC10646845; doi:10.1136/ard-2023-224482), 2023-09-12
Supplement: ard-2023-224482supp001.pdf [file ard-2023-224482supp001.pdf]

## SUPPLEMENTARY MATERIALS

### Inclusion criteria

Patients were eligible to be included in the study only if all of the following criteria applied:

1. Age  $\geq 18$  years at the time of signing informed consent.
2. Meets ACR/EULAR 2010 RA Classification Criteria with a duration of RA disease of  $\geq 6$  months at time of screening and participant not diagnosed before 16 years of age.
3. Must have active disease at both screening and baseline, as defined by having both:
  - $\geq 6/68$  TJC
  - $\geq 6/66$  SJC.

If surgical treatment of a joint has been performed, that joint cannot be counted in the TJC or SJC for enrolment purposes.

4. Must have a hsCRP measurement  $\geq 3$  mg/L at screening.
5. Must meet Class I, II or III of the ACR 1991 Revised Criteria for Global Functional Status in RA.
6. Must have at least 1 bone erosion present on hand/wrist or foot radiographs confirmed by central reading at screening.
7. *ContRAst 1*: Must have inadequate response, despite currently taking MTX: weekly 15-25 mg oral or injected, for at least 12 weeks at the maximum tolerated dose prior to Day 1, with no change in route of administration in this time. MTX dose must be stable and tolerated for at least 8 weeks prior to Day 1. A lower dose of  $\geq 7.5$  mg/week is acceptable if reduced for reasons of intolerance to MTX, for example, nausea/vomiting, hepatic or haematologic toxicity, or per local requirement (there must be clear documentation in the medical record). Exception: A lower dose of 6 mg/week is allowed if the minimum locally approved or recommended dose is lower than 7.5 mg/week.

*ContRAst 2*: Must have inadequate response, despite currently taking at least one and at most two concomitant csDMARDs for at least 12 weeks prior to Day 1, from the following:

- MTX: weekly 15-25 mg oral or injected, for at least 12 weeks at the maximum tolerated dose prior to Day 1, with no change in route of administration in this time. A lower dose of  $\geq 7.5$  mg/week is acceptable if reduced for reasons of intolerance to MTX, for example, nausea/vomiting, hepatic or haematologic toxicity, or per local requirement (there must be clear documentation in the medical record). Exception: A lower dose of 6 mg/week is allowed if the minimum locally approved or recommended dose is lower than 7.5 mg/week.
- Hydroxychloroquine up to 400 mg/day or chloroquine up to 250 mg/day.
- Sulfasalazine up to 3000 mg/day.
- Leflunomide up to 20 mg/day. Note: concomitant use of leflunomide and MTX is not allowed, for safety reasons.
- Bucillamine up to 100 mg/day (or up to 300 mg/day if permitted per local requirements).
- Iguratimod up to 50 mg/day.

NOTE: The dose of csDMARD(s) must be stable and tolerated for at least 8 weeks prior to Day 1 and should remain stable throughout the study from screening to end of treatment period, except adjustment for safety reasons. In addition, patients with prior bDMARD exposure: Prior exposure to one or more bDMARDs is permitted. Prior bDMARD exposure may have been with or without combination with a csDMARD. Prior bDMARD therapy must be discontinued before randomisation per

**Supplementary Table 2.**

8. Body weight  $\geq 40$  kg
9. Male or female patients are eligible to participate so long as they meet and agree to abide by the contraceptive criteria
10. Capable of giving signed informed consent which includes compliance with the requirements and restrictions listed in the informed consent form and in the protocol.
11. *ContRAst 1*: Willing to continue or initiate treatment with oral folic acid (at least 5 mg/week) or equivalent and be treated during the entire study (mandatory co-medication for MTX treatment).

*ContRAst 2*: For patients on MTX: Must be willing to continue or initiate treatment with oral folic acid (at least 5 mg/week) or equivalent and be treated during the entire study (mandatory co-medication for MTX treatment).

### **Exclusion criteria**

A participant will not be eligible for inclusion in this study if any of the following criteria apply:

1. Active infections (including localised infections), or history of recurrent infections (excluding recurrent fungal infections of the nail bed), or has required management of acute or chronic infections, as follows:
  - Currently taking any suppressive anti-infective therapy for a chronic infection (such as pneumocystis, cytomegalovirus, herpes simplex virus, herpes zoster and atypical mycobacteria) OR
  - Hospitalisation for treatment of infection within 26 weeks of Day 1 OR
  - Use of parenteral (intravenous) or intramuscular antimicrobials (antibacterials, antivirals, antifungals, or antiparasitic agents) within 26 weeks of Day 1 or oral antimicrobials (apart from isonicotinic acid hydrazide use for latent TB treatment) within 14 days of Day 1.
2. Symptomatic herpes zoster within 3 months prior to screening.
3. Hereditary or acquired immunodeficiency disorder, including immunoglobulin deficiency.
4. Known infection with human immunodeficiency virus or positive test at screening.
5. History of infected joint prosthesis at any time, with the prosthesis still in situ. History of chronic leg ulcers, permanent in-dwelling catheters, chronic sinusitis, recurrent chest infections or recurrent urinary tract infections.
6. Any baseline symptomatology that in the investigator's opinion would confound the early detection of PAP based upon clinical features, such as persistent cough (CTC Grade  $\geq 2$ ) or persistent dyspnoea (dyspnoea scale Grade  $\geq 2$ ).
7. Current unstable liver or biliary disease per investigator assessment defined by the presence of ascites, encephalopathy, coagulopathy, hypoalbuminaemia, oesophageal or gastric varices, persistent jaundice, or cirrhosis.
8. Current acute or chronic Hepatitis B and/or Hepatitis C.

9. Current or history of renal disease or estimated glomerular filtration rate by Chronic Kidney Disease Epidemiology Collaboration equation calculation  $<60$  mL/min/1.73m<sup>2</sup> at screening.
10. Breast cancer within the past 10 years or lymphoma, leukaemia, or any other malignancy within the past 5 years except for cervical carcinoma in situ that has been resected with no evidence of recurrence or metastatic disease, or basal cell or squamous epithelial cancers of the skin that have been resected with no evidence of recurrence or metastatic disease for at least 3 years.
11. History of any lymphoproliferative disorder, such as Epstein-Barr Virus related lymphoproliferative disorder, or signs and symptoms suggestive of current lymphatic disease.
12. History or presence of significant other concomitant illness according to Investigator judgment such as, but not limited to cardiovascular (including Stage III or IV cardiac failure according to New York Heart Association classification, myocardial infarction within 3 months, unstable angina pectoris, uncontrolled hypertension, uncontrolled hypercholesterolemia, uncontrolled diabetes mellitus, VTE requiring anticoagulation), neurological, endocrinological, gastrointestinal (including diverticulitis), hepatic disease, metabolic, lymphatic disease, or previous renal transplant that would adversely affect the participant's participation in the study.
13. Any condition or contraindication as addressed in the local product information or local clinical practice for tofacitinib that would preclude the participant from participating in the study. For all patients, investigators should carefully review potential risk factors related to VTE, including DVT and PE and review the risk of infection in patients older than 65 years of age.
14. History of other inflammatory rheumatologic or systemic autoimmune disorder, other than Sjögren's syndrome secondary to RA, that may confound the evaluation of the effect of the study intervention such as mixed connective tissue disease, psoriatic arthritis, juvenile chronic arthritis, spondyloarthritis, Felty syndrome, systemic lupus erythematosus, scleroderma, Crohn's disease, ulcerative colitis, or vasculitis.
15. Presence of fibromyalgia that, in the investigator's opinion, would make it difficult to appropriately assess RA activity for the purposes of the study.

16. Undergone any major surgery within 8 weeks prior to study entry or will require major surgery during the study that, in the opinion of the investigator in consultation with the medical monitor, would pose an unacceptable risk to the participant.
17. Current or previous active *Mycobacterium tuberculosis* regardless of treatment.
18. Evidence of latent TB (as documented by a positive QuantiFERON-TB Gold plus test or T-SPOT.TB test at screening, no findings on medical history or clinical examination consistent with active TB, and a normal chest radiograph) except for patients that either:
  - Are willing to complete at least 4 weeks of anti-TB therapy as per World Health Organisation or national guidelines prior to randomisation and agree to complete the remainder of treatment while in the study OR
  - Are documented as having evidence of satisfactory anti-TB treatment as per WHO or national guidelines within the last 5 years following review by a
  - physician specialising in TB.
19. Previous close contact with a person with active TB and did not receive satisfactory anti-TB treatment as per WHO or national guidelines.
20. Significant allergies to humanised monoclonal antibodies.
21. Clinically significant multiple or severe drug allergies or severe post-treatment hypersensitivity reactions (including, but not limited to, erythema multiforme major, linear immunoglobulin A dermatosis, toxic epidermal necrolysis, and exfoliative dermatitis).
22. Rare hereditary problems of galactose intolerance, the Lapp lactase deficiency or glucose-galactose malabsorption.
23. Any prior treatment antagonising GM-CSF or its receptor.
24. Any prior treatment with JAKi(s) (either experimental or approved) including, but not limited to tofacitinib, baricitinib, upadacitinib, filgotinib and peficitinib.
25. *ContRAst 1*: Any prior treatment with a biologic DMARD (either experimental or approved) which has been discontinued due to an IR.
26. Patients who are expected to be non-compliant with restrictions on medications and vaccinations prior to the study, during the study or during the 8-week safety follow-up of the study. See **Supplementary Table 3** for details of prohibited medications/treatments.

27. Current enrolment or past participation within the last 42 days before randomisation in any other clinical study involving an investigational study treatment or any other type of medical research.
28. ALT or aspartate transaminase (AST) >1.5 x upper limit of normal (ULN).
29. Bilirubin >1.5 x ULN (isolated bilirubin >1.5 x ULN is acceptable if bilirubin is fractionated and direct bilirubin <35%).
30. Has a positive test for hepatitis B virus (HBV) defined as either:
  - Positive for hepatitis B surface antigen OR
  - Positive for hepatitis B core antibody and positive for HBV deoxyribonucleic acid.
31. Positive test for hepatitis C antibody at screening. Patients with positive Hepatitis C antibody due to prior resolved disease can be enrolled, only if a confirmatory negative hepatitis C RNA test is obtained.
32. Haemoglobin  $\leq 9$  g/dL; white blood cell count  $\leq 3.0 \times 10^9$ /L; platelet count  $\leq 100 \times 10^9$ /L; absolute neutrophil count  $< 1.0 \times 10^9$ /L; lymphocyte count  $\leq 0.75 \times 10^9$ /L at screening.
33. Abnormal chest radiograph within 12 weeks of screening judged by the investigator as clinically significant.
34. Pregnant or lactating, or women planning to become pregnant or initiating breastfeeding.
35. Current drug or alcohol abuse or dependence, or a history of drug or alcohol abuse or dependence within a year prior to Day 1.
36. History of sensitivity to any of the study treatments, or components thereof or a history of drug or other allergy that, in the opinion of the investigator or Medical Monitor, contraindicates their participation.

## Supplementary methods

### *mTSS*

The images from all time points for a specific patient and read campaign were evaluated in a single session. The readers were presented with all the time points to be read for a given patient, displayed side-by-side and blinded to the chronological order of the visits. The same approach will be used for both primary readers as well as the adjudicators. During image analysis, readers will be blinded to treatment assignment, to clinical information, and to the results of image evaluations by the other central readers.

There was an adjudication for results that show a large discrepancy between the two independent readers for the efficacy assessment. The adjudication process involved reading by a third independent reader who was blinded to the results of first two readers.

Cases that required adjudication were identified once the two primary independent readings were completed, according to the following criteria:

Change in mTSS from screening in different directions (one positive, one negative) that differ by 5 or more score points

Change in mTSS from screening in the same direction (both positive or both negative) that differ by 5 or more score points; a score of 0 change was considered to be in the same direction as the change assessed by the second reader

Cases read by one independent reader and set as un-readable by the other independent reader.

### *Handling of missing data*

Intermittent missing data (i.e. between two non-missing assessments) for the ACR20 response were imputed under a missing at random (MAR) assumption.

If a participant experienced any of the intercurrent (post-randomisation) events (IEs\*) but efficacy data continued to be collected, their data were analysed as if they were still on the original randomised intervention.

Study withdrawal before the completion of the trial created missing outcome data. This could occur concurrently or after the IE.

Missing data for the ACR20 response resulting from study withdrawal were imputed using one of three possible multiple imputation (MI) models depending on the availability of off-treatment data (i.e. data that were collected post discontinuation of study intervention), using principles introduced by Roger et al.<sup>1</sup>

#### **1. MI using off-treatment data within randomised treatment arm:**

If there was sufficient off-treatment data within a randomised treatment arm (i.e. at least 3 participants per arm per visit), then missing data were imputed conditional on the participant's observed outcomes, using off-treatment data within randomised treatment arm. The use of this MI model assumed that missing outcomes resulting from participants withdrawing from the study would behave in a similar way to other participants who discontinued study intervention, were randomised to the same treatment arm, and continued providing data post-discontinuation of study intervention.

#### **2. MI using off-treatment data across all treatment arms:**

If there was insufficient off-treatment data within a randomised treatment arm (i.e. failure of the imputation model in option 1) but there was sufficient off-treatment data across all treatment arms combined (i.e. at least 3 participants per visit), then missing data were imputed conditional on the participant's observed outcomes, using off-treatment data across all treatment arms. The use of this MI model assumed that missing outcomes resulting from participants withdrawing from the study would behave in a similar way to other participants who discontinued study intervention and



continued providing data post-discontinuation of study intervention regardless of randomised treatment arm.

### **3. MI under MAR assumption:**

If there was insufficient off-treatment data (i.e. neither option 1 nor 2 is feasible) then all missing data were imputed under a MAR assumption. This MI model uses all available data collected on- and off-treatment within randomised treatment arm, and assumed missing outcomes resulting from participants withdrawing from the study would behave in a similar way to participants who were randomised to the same treatment arm and had data collected in the study, with no adjustment for values before or after intercurrent events.

Note: Week 1 data were not included in any imputation models due to the unavailability of off-treatment data at this visit by design of the study.

\*The IEs anticipated to impact on the interpretation of the treatment effect for the primary objective were: discontinuation of study intervention for any reason; use of prohibited medication and change in stable dose of background medication.

1. Roger JH, Bratton DJ, Mayer B, et al. Pharm Stat. 2019;18:85–95.

**Supplementary Figure 1.** Step-down multiple testing procedure for contRAst 1 and contRAst 2

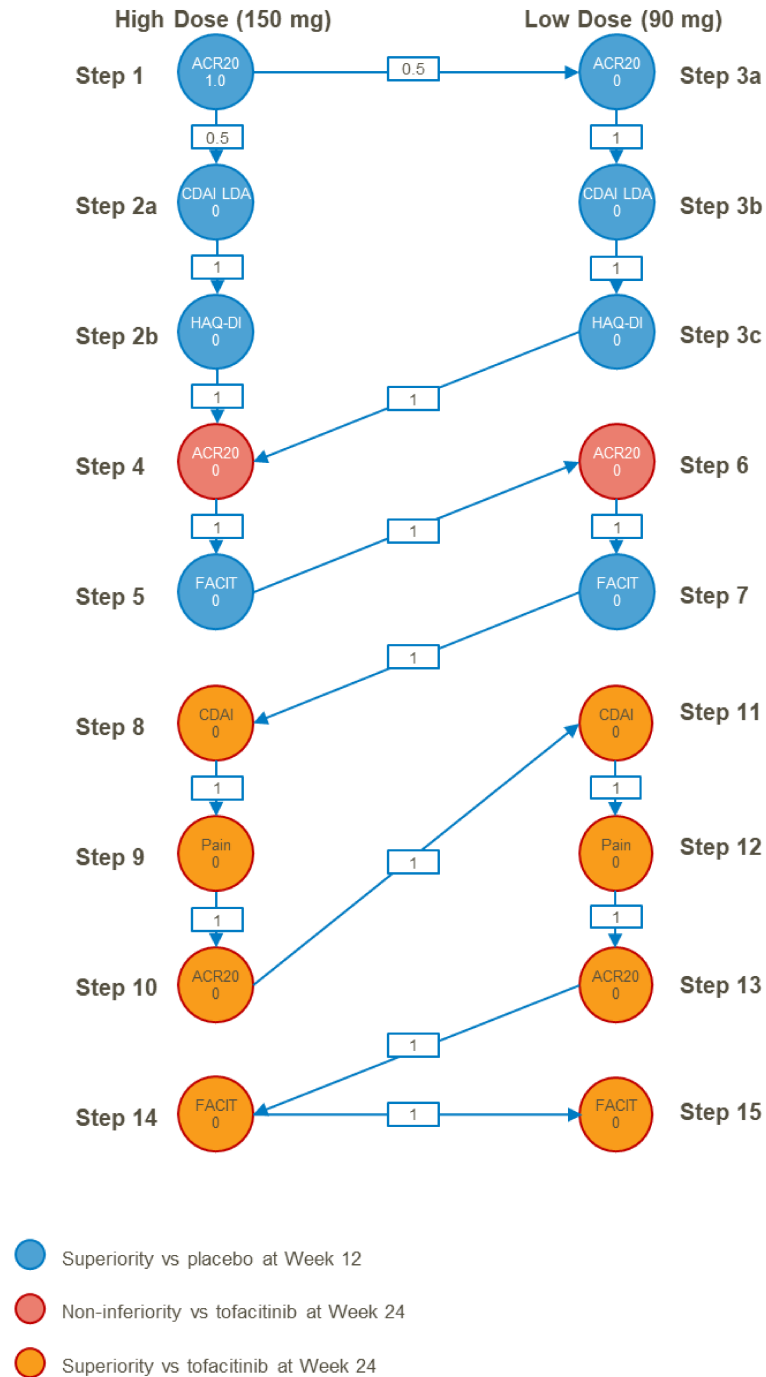

The numbers in the circles refer to the initial weighting of alpha. The numbers along the arrows refer to the weighting of alpha that is passed along to the next test. ACR,

American College of Rheumatology; CDAI, Clinical Disease Activity Index; HAQ-DI, Health Assessment Questionnaire-Disability Index; LDA, low disease activity.

Supplementary Figure 2A. Patient disposition for contrAst 1

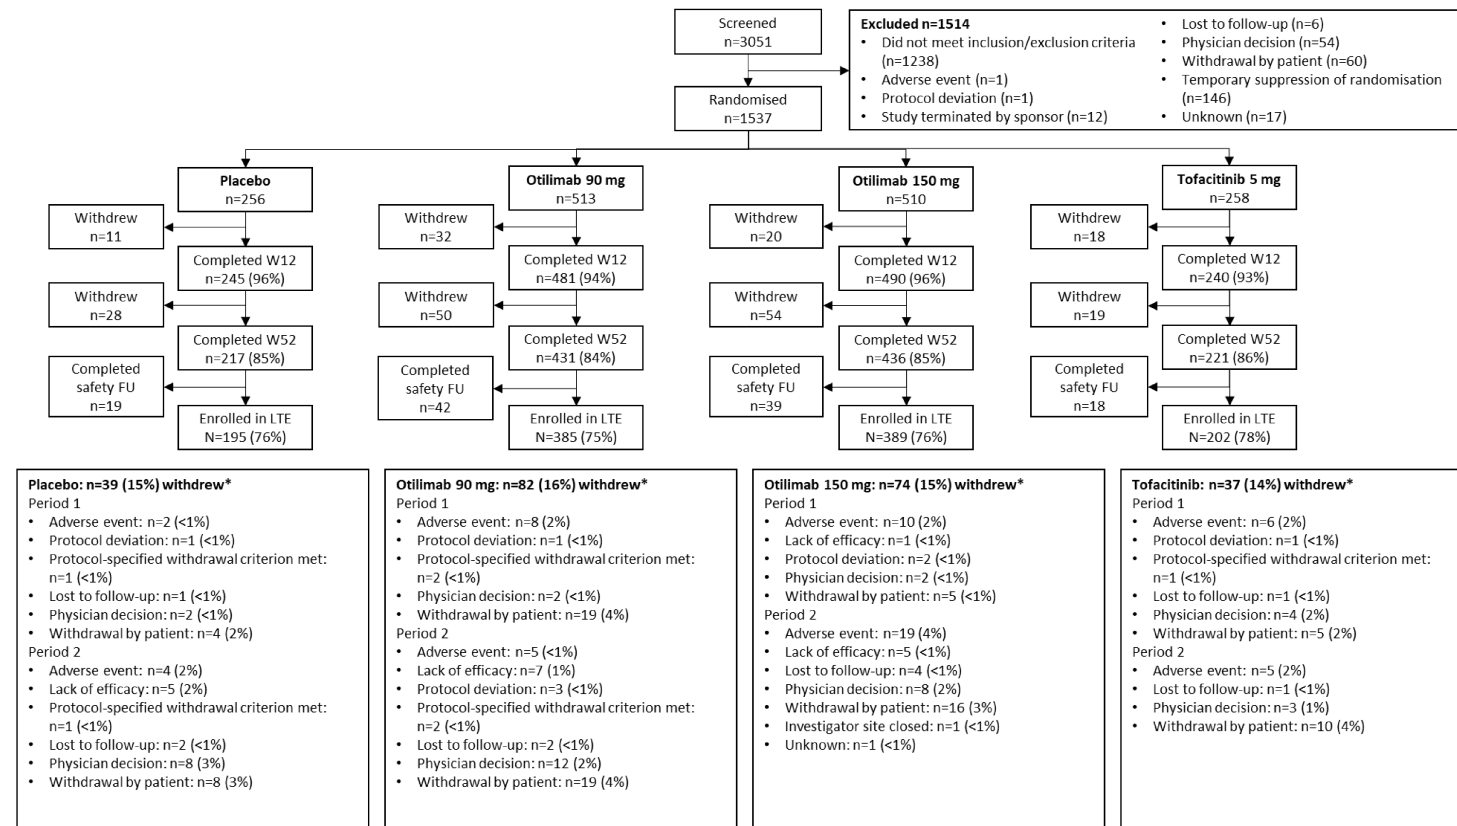

\*Only one primary reason for treatment discontinuation permitted. Period 1 defined as time from randomisation to Week 12, Period 2 defined as time from first dose post-Week 12 until date of study completion/withdrawal/treatment withdrawal plus FU, whichever is earlier. FU, follow-up; LTE, long-term extension; W, week.

Supplementary Figure 2B. Patient disposition for contrAst 2

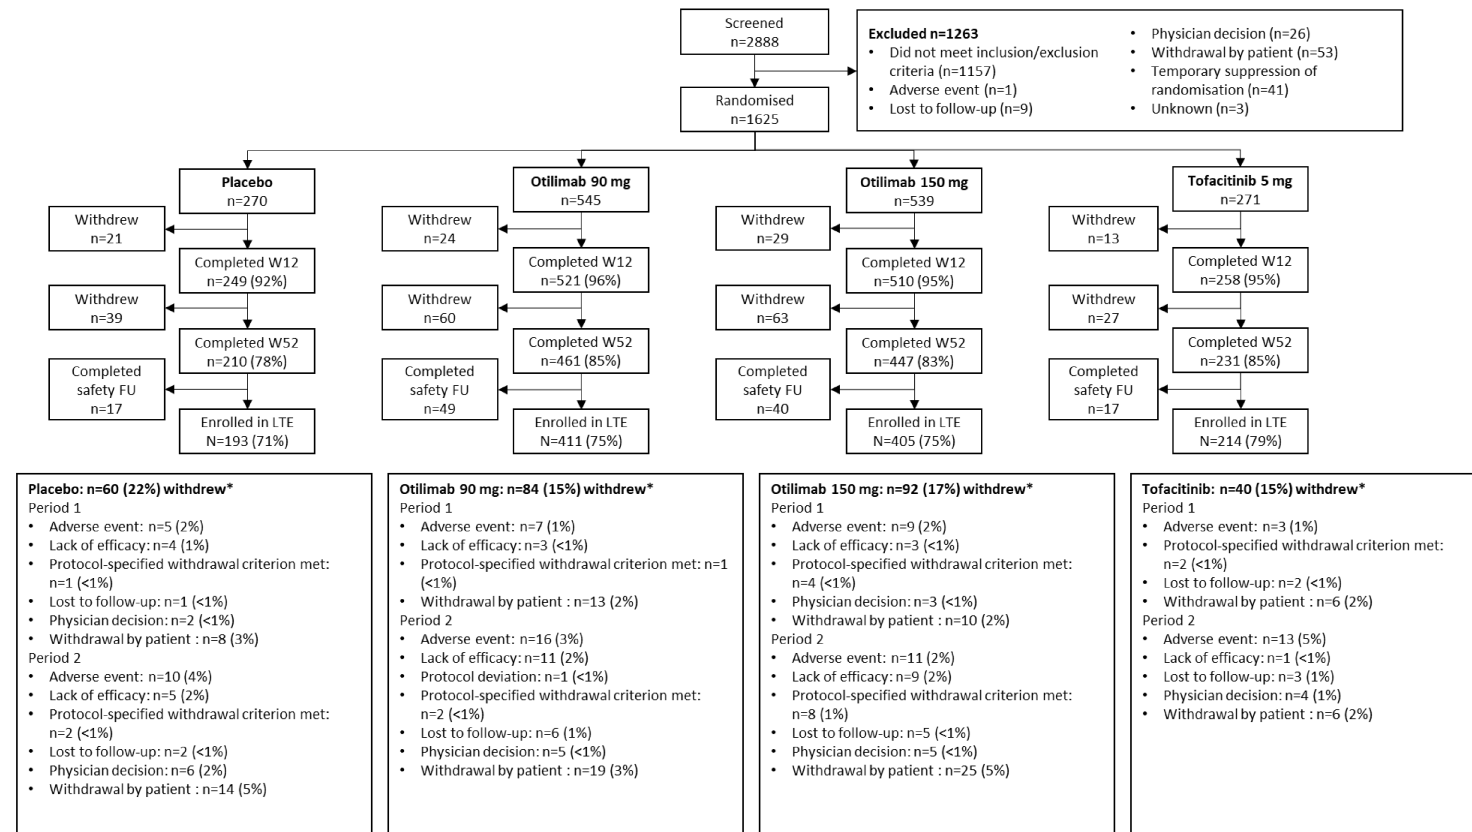

\*Only one primary reason for treatment discontinuation permitted. Period 1 defined as time from randomisation to Week 12, Period 2 defined as time from first dose post-Week 12 until date of study completion/withdrawal/treatment withdrawal plus FU, whichever is earlier. FU, follow-up; LTE, long-term extension; W, week.

**Supplementary Figure 3.** Proportion of A) ACR20 responders and B) CDAI-LDA responders and C) LS mean CFB in HAQ-DI Score at each assessment visit

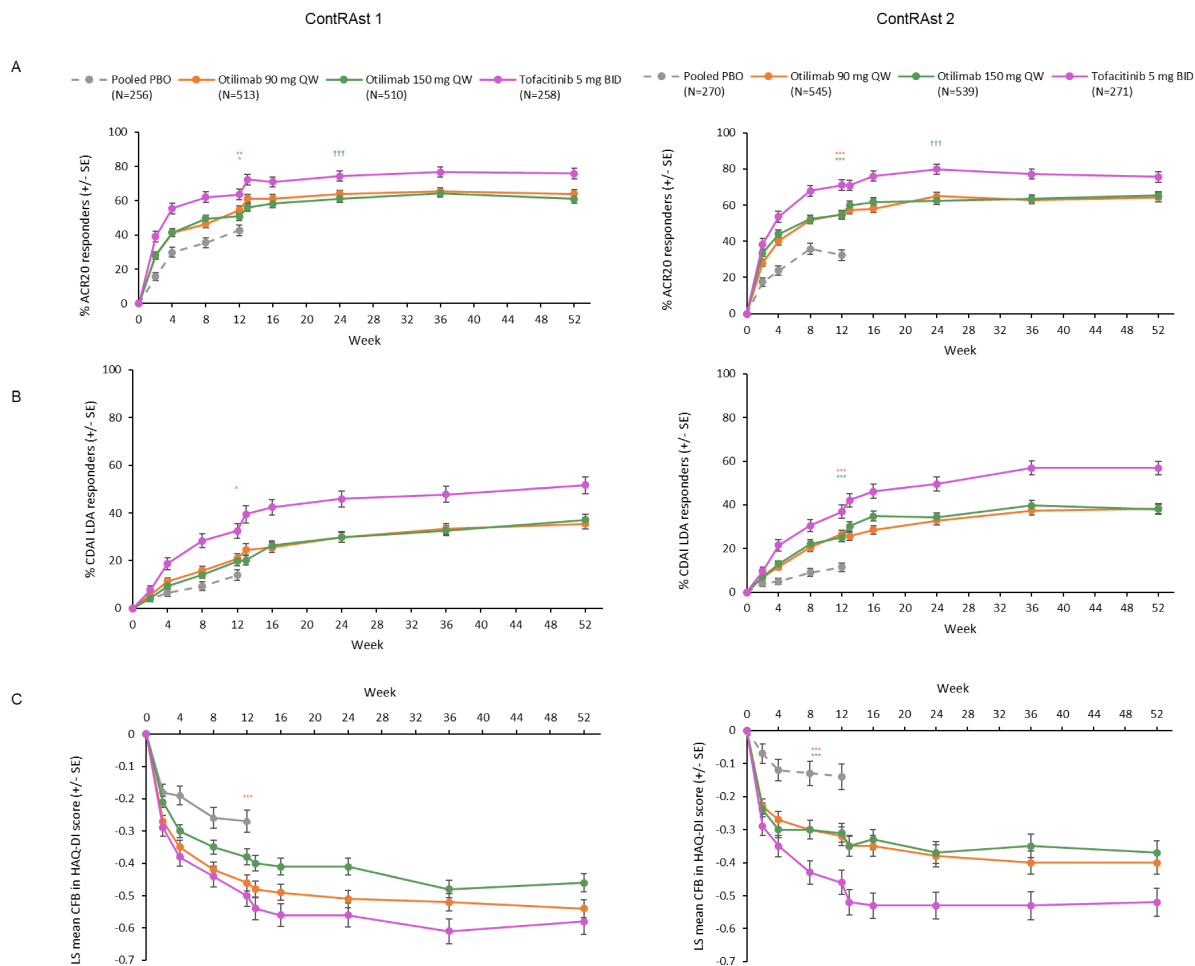

\* $P < 0.05$ ; \*\* $P < 0.01$ ; \*\*\* $P < 0.001$  for otilimab vs placebo per SAP; †††  $P < 0.001$  for otilimab vs tofacitinib per SAP. Comparison of tofacitinib vs placebo was not included in the SAP; however, statistical data are provided in the data tables.

ACR, American College of Rheumatology; BID, twice daily; CDAI, clinical disease activity index; CFB, change from baseline; LDA, low disease activity; LS, least squares; PBO, placebo; QW, once weekly; SAP, statistical analysis plan.

**Supplementary Figure 4.** Supplementary analysis\* of the proportion of patients achieving ACR20 at each assessment visit (non-responder imputation)

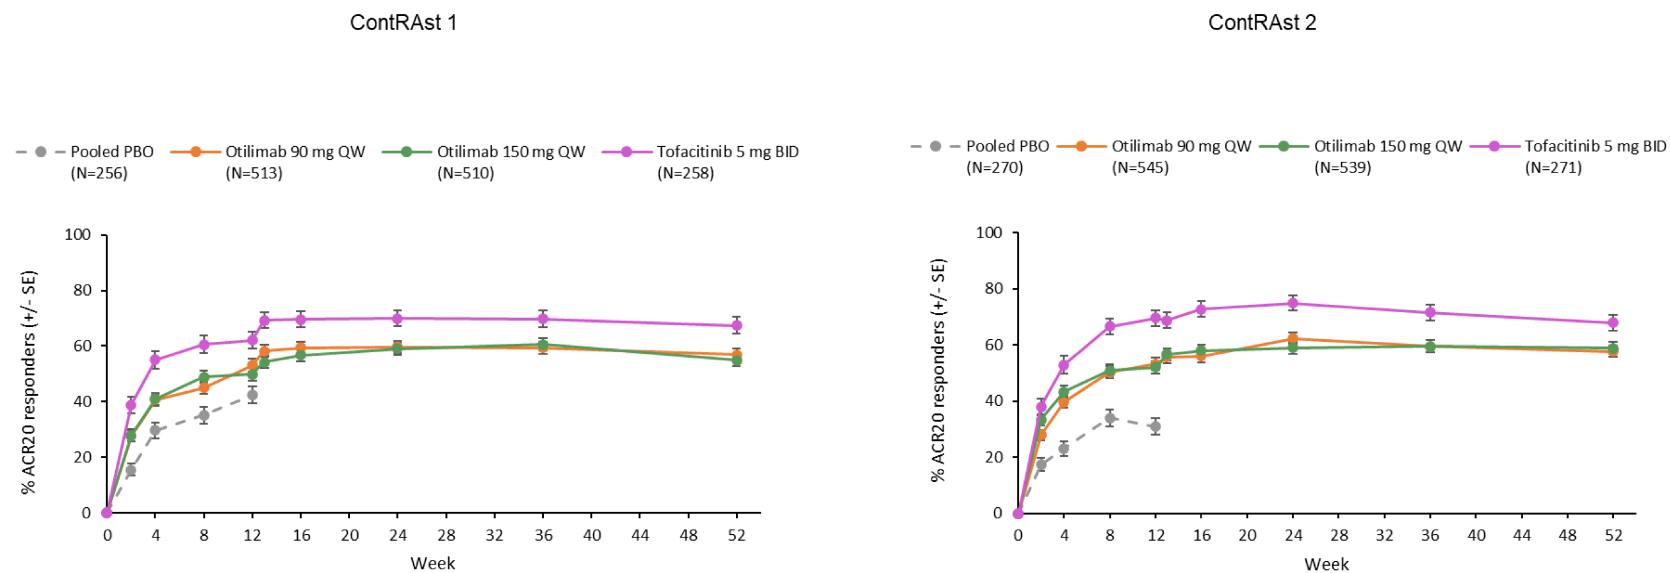

\*This supplementary analysis was not included in the multiple testing hierarchy, therefore P values are not provided. ACR, American College of Rheumatology; BID, twice daily; PBO, placebo; QW, once weekly; SE, standard error.

**Supplementary Figure 5.** Supplementary analysis\* of the proportion of patients achieving ACR20 at each assessment visit, splitting out pooled placebo arm

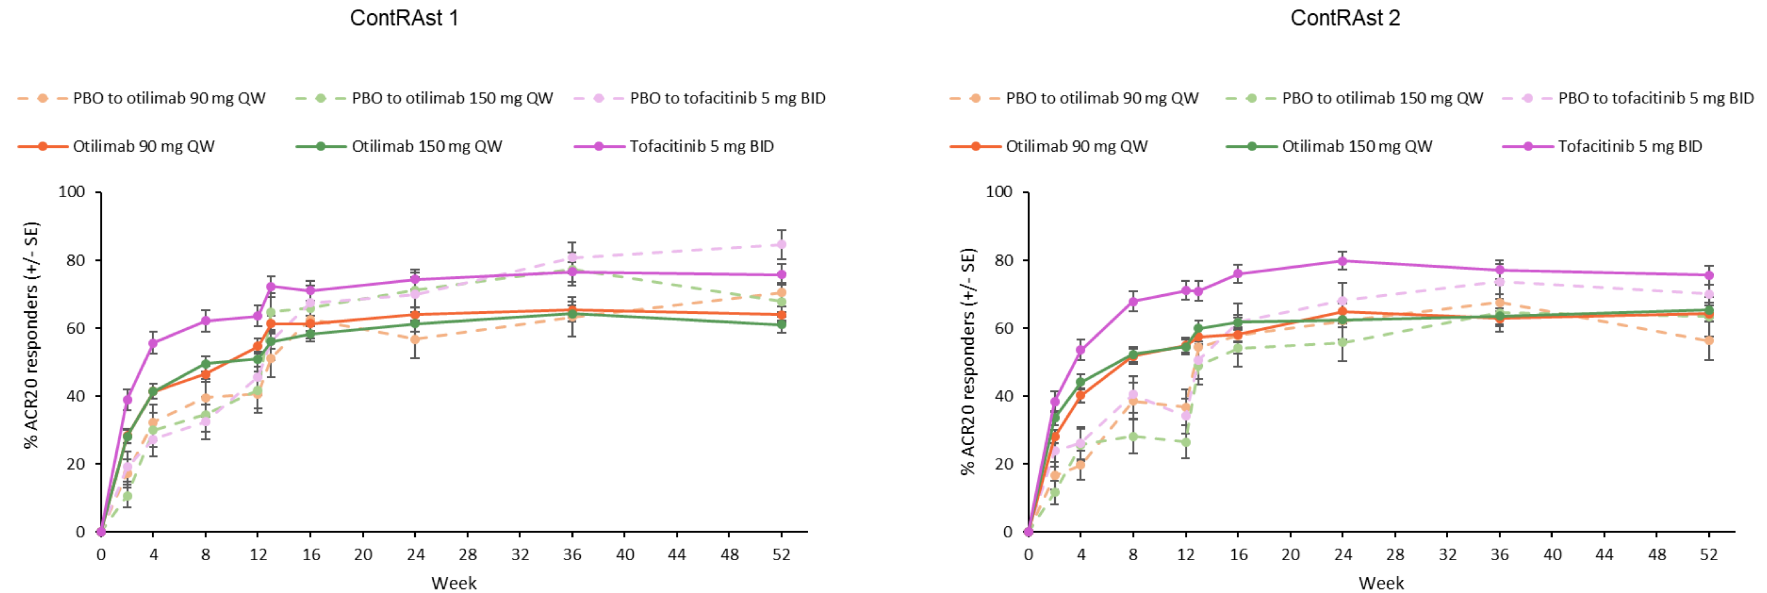

\*This supplementary analysis was not included in the multiple testing hierarchy, therefore P values are not provided. ACR, American College of Rheumatology; BID, twice daily; PBO, placebo; QW, once weekly; SE, standard error.



**Supplementary Figure 6. Subgroup analysis of ACR20 for A) otilimab vs placebo at Week 12 and B) otilimab vs tofacitinib at Week 24 in contRAst 1**

A

| Otilimab 90 mg                         | Pooled PBO responders, % (SE)<br>N=256 | Otilimab 90 mg QW responders, % (SE)<br>N=513 | OR (95% CI)       |
|----------------------------------------|----------------------------------------|-----------------------------------------------|-------------------|
| <b>Overall</b>                         | 42.7 (3.15)                            | 54.7 (2.31)                                   | 1.62 (1.19, 2.21) |
| <b>Sex</b>                             |                                        |                                               |                   |
| Female (n=603)                         | 41.7 (3.55)                            | 54.4 (2.60)                                   | 1.68 (1.18, 2.38) |
| Male (n=166)                           | 46.7 (6.84)                            | 55.8 (4.85)                                   | 1.42 (0.73, 2.77) |
| <b>Both RF- and Anti CCP antibody-</b> |                                        |                                               |                   |
| No (n=686)                             | 42.1 (3.28)                            | 56.1 (2.44)                                   | 1.76 (1.27, 2.44) |
| Yes (n=79)                             | 52.9 (11.51)                           | 43.5 (6.72)                                   | 0.69 (0.24, 1.99) |
| <b>Duration of RA</b>                  |                                        |                                               |                   |
| ≤5 years (n=309)                       | 50.3 (5.08)                            | 57.0 (3.59)                                   | 1.31 (0.80, 2.14) |
| >5–10 years (n=186)                    | 30.9 (6.03)                            | 53.5 (4.53)                                   | 2.58 (1.33, 5.00) |
| >10 years (n=274)                      | 42.4 (5.18)                            | 52.8 (3.88)                                   | 1.52 (0.91, 2.54) |

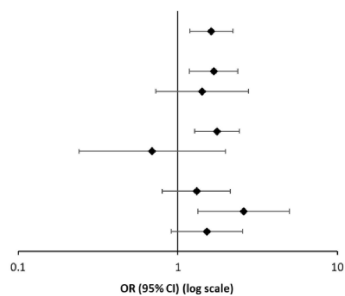

| Otilimab 150 mg                        | Pooled PBO responders, % (SE)<br>N=256 | Otilimab 150 mg QW responders, % (SE)<br>N=510 | OR (95% CI)       |
|----------------------------------------|----------------------------------------|------------------------------------------------|-------------------|
| <b>Overall</b>                         | 42.7 (3.15)                            | 50.9 (2.27)                                    | 1.39 (1.02, 1.89) |
| <b>Sex</b>                             |                                        |                                                |                   |
| Female (n=601)                         | 41.7 (3.55)                            | 50.8 (2.57)                                    | 1.44 (1.02, 2.04) |
| Male (n=165)                           | 46.7 (6.84)                            | 51.3 (4.82)                                    | 1.15 (0.59, 2.24) |
| <b>Both RF- and Anti CCP antibody-</b> |                                        |                                                |                   |
| No (n=686)                             | 42.1 (3.28)                            | 53.1 (2.40)                                    | 1.55 (1.12, 2.15) |
| Yes (n=76)                             | 52.9 (11.51)                           | 35.5 (6.66)                                    | 0.48 (0.16, 1.39) |
| <b>Duration of RA</b>                  |                                        |                                                |                   |
| ≤5 years (n=300)                       | 50.3 (5.08)                            | 51.4 (3.66)                                    | 1.05 (0.64, 1.72) |
| >5–10 years (n=186)                    | 30.9 (6.03)                            | 56.7 (4.49)                                    | 2.93 (1.51, 5.66) |
| >10 years (n=280)                      | 42.4 (5.18)                            | 46.5 (3.75)                                    | 1.18 (0.71, 1.96) |

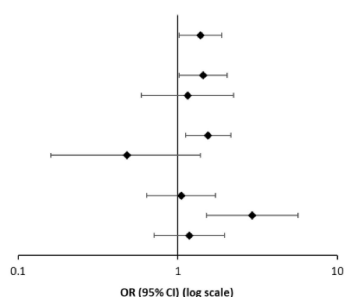

B

| Otilimab 90 mg                         | Tofacitinib 5 mg BID responders, % (SE)<br>N=258 | Otilimab 90 mg QW responders, % (SE)<br>N=513 | OR (95% CI)       |
|----------------------------------------|--------------------------------------------------|-----------------------------------------------|-------------------|
| <b>Overall</b>                         | 74.4 (2.95)                                      | 63.9 (2.29)                                   | 0.61 (0.43, 0.87) |
| <b>Sex</b>                             |                                                  |                                               |                   |
| Female (n=610)                         | 74.1 (3.28)                                      | 63.2 (2.59)                                   | 0.60 (0.40, 0.88) |
| Male (n=161)                           | 75.3 (6.46)                                      | 66.6 (4.61)                                   | 0.63 (0.28, 1.39) |
| <b>Both RF- and Anti CCP antibody-</b> |                                                  |                                               |                   |
| No (n=682)                             | 75.4 (3.07)                                      | 65.5 (2.39)                                   | 0.62 (0.43, 0.91) |
| Yes (n=83)                             | 61.1 (10.66)                                     | 50.2 (6.93)                                   | 0.62 (0.22, 1.76) |
| <b>Duration of RA</b>                  |                                                  |                                               |                   |
| ≤5 years (n=307)                       | 71.1 (4.90)                                      | 71.1 (3.35)                                   | 0.99 (0.56, 1.74) |
| >5–10 years (n=182)                    | 76.0 (6.14)                                      | 60.9 (4.56)                                   | 0.50 (0.23, 1.06) |
| >10 years (n=282)                      | 76.6 (4.37)                                      | 57.9 (3.88)                                   | 0.40 (0.22, 0.71) |

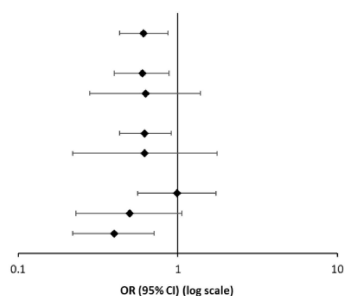

| Otilimab 150 mg                        | Tofacitinib 5 mg BID responders, % (SE)<br>N=258 | Otilimab 150 mg QW responders, % (SE)<br>N=510 | OR (95% CI)       |
|----------------------------------------|--------------------------------------------------|------------------------------------------------|-------------------|
| <b>Overall</b>                         | 74.4 (2.95)                                      | 61.3 (2.27)                                    | 0.55 (0.38, 0.78) |
| <b>Sex</b>                             |                                                  |                                                |                   |
| Female (n=608)                         | 74.1 (3.28)                                      | 60.2 (2.56)                                    | 0.52 (0.35, 0.76) |
| Male (n=160)                           | 75.3 (6.46)                                      | 65.5 (4.71)                                    | 0.58 (0.26, 1.30) |
| <b>Both RF- and Anti CCP antibody-</b> |                                                  |                                                |                   |
| No (n=682)                             | 75.4 (3.07)                                      | 62.2 (2.39)                                    | 0.54 (0.37, 0.78) |
| Yes (n=80)                             | 61.1 (10.66)                                     | 53.4 (7.03)                                    | 0.73 (0.26, 2.06) |
| <b>Duration of RA</b>                  |                                                  |                                                |                   |
| ≤5 years (n=298)                       | 71.1 (4.90)                                      | 63.8 (3.55)                                    | 0.72 (0.41, 1.25) |
| >5–10 years (n=182)                    | 76.0 (6.14)                                      | 61.7 (4.45)                                    | 0.51 (0.24, 1.10) |
| >10 years (n=288)                      | 76.6 (4.37)                                      | 58.5 (3.79)                                    | 0.42 (0.24, 0.74) |

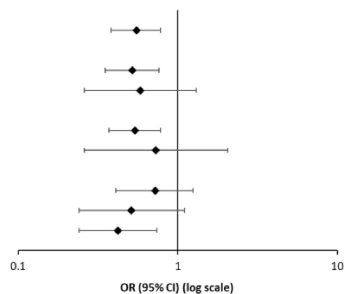

ACR, American College of Rheumatology; BID, twice daily; CCP, cyclic citrullinated peptide; CI, confidence interval; OR, odds ratio; PBO, placebo; QW, once weekly; RA, rheumatoid arthritis; RF, rheumatoid factor; SE, standard error.

### Supplementary Figure 7. Subgroup analysis of ACR20 for A) otilimab vs placebo at Week 12 and B) otilimab vs tofacitinib at Week 24 in contRAst 2

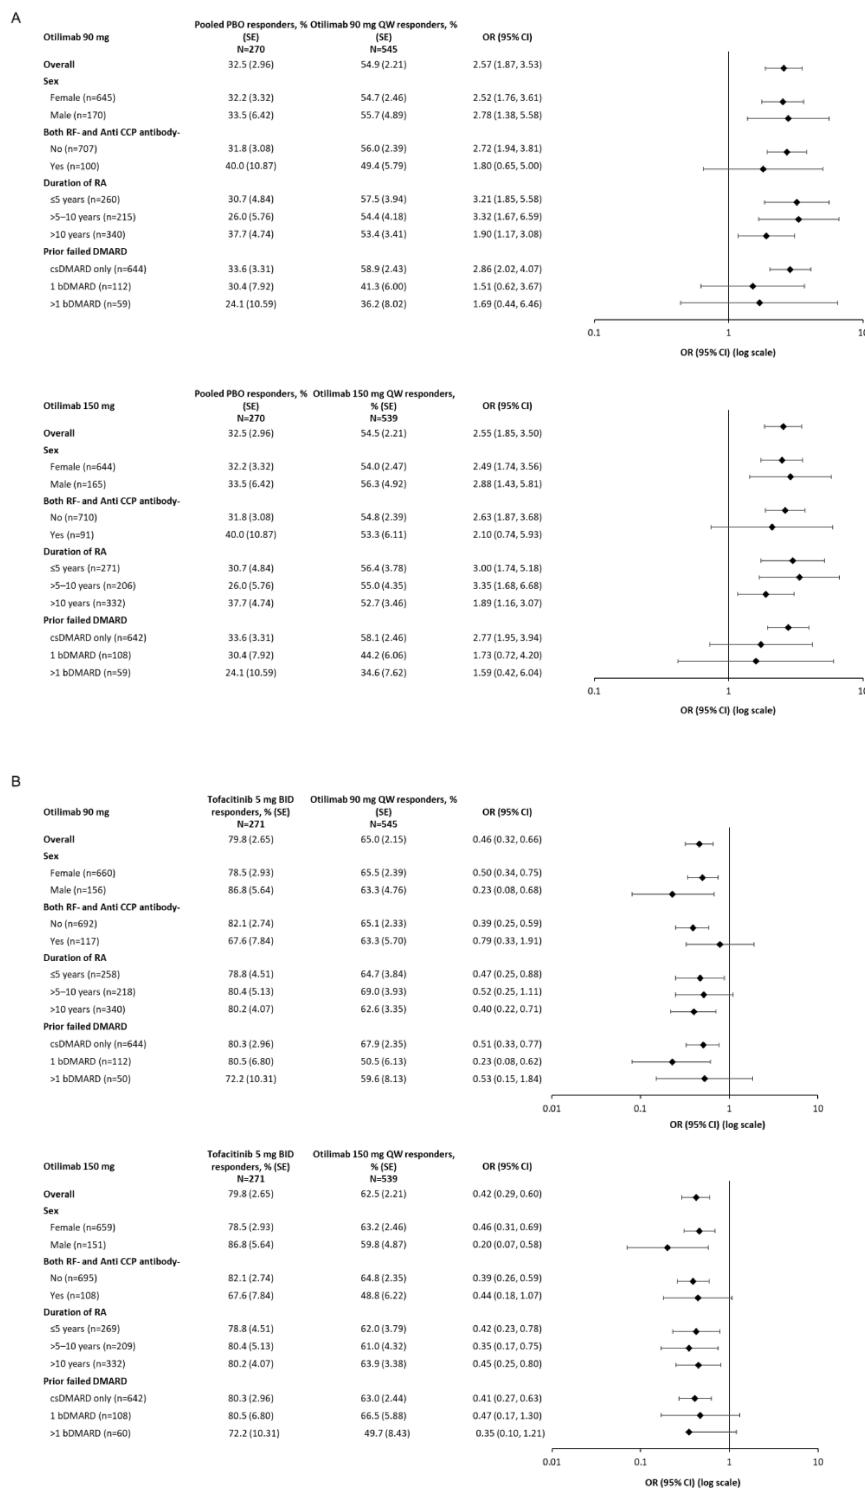

ACR, American College of Rheumatology; b/csDMARD, biologic/conventional synthetic disease-modifying anti-rheumatic drug; BID, twice daily; CCP, cyclic citrullinated peptide; CI, confidence interval; OR, odds ratio; PBO, placebo; QW, once weekly; RA, rheumatoid arthritis; RF, rheumatoid factor; SE, standard error.

**Supplementary Figure 8.** LS mean CFB in A) pain VAS, B) FACIT-Fatigue and C) CDAI at each assessment visit

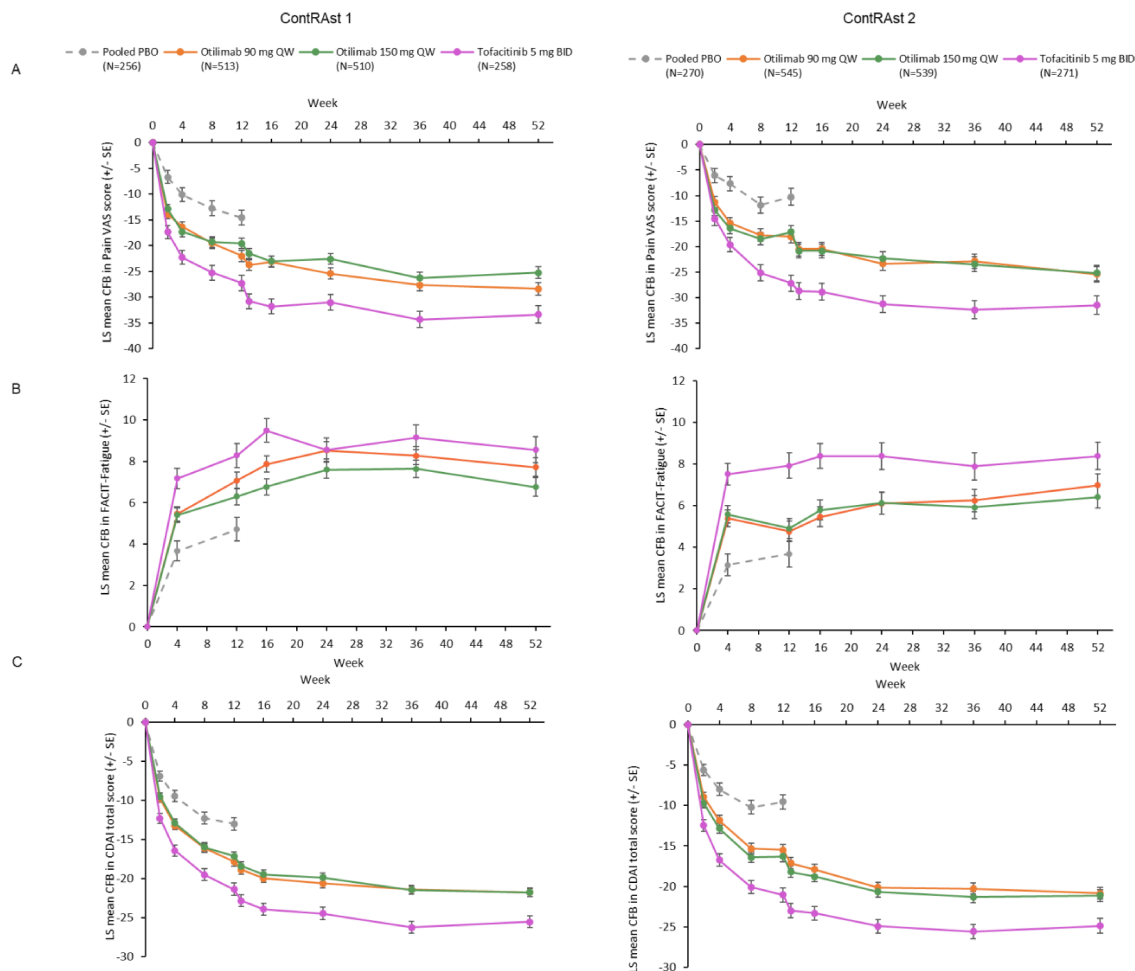

Due to the step-down multiple testing approach, statistical significance was not assessed, or cannot be claimed, for otilimab vs placebo for these endpoints, however, statistical data are provided in the data tables.

BID, twice daily; CDAI, clinical disease activity index; CFB, change from baseline; FACIT, Functional Assessment of Chronic Illness Therapy; LS, least squares; PBO, placebo; QW, once weekly; SE, standard error; VAS, visual analogue scale.

**Supplementary Figure 9.** Proportion of patients achieving CDAI remission (CDAI  $\leq 2.8$ ) at each assessment visit

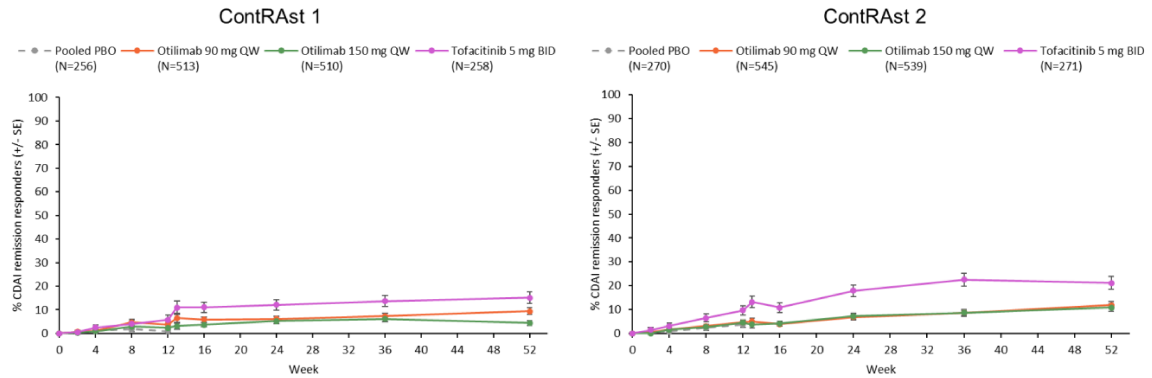

Due to the step-down multiple testing approach, statistical significance was not assessed, or cannot be claimed, for otilimab vs placebo for these endpoints, however, statistical data are provided in the data tables.

BID, twice daily; CDAI, clinical disease activity index; PBO, placebo, QW, once weekly; SE, standard error.

**Supplementary Figure 10.** Proportion of patients achieving ACR50 at A) Week 12, 24 and 52 and B) each assessment visit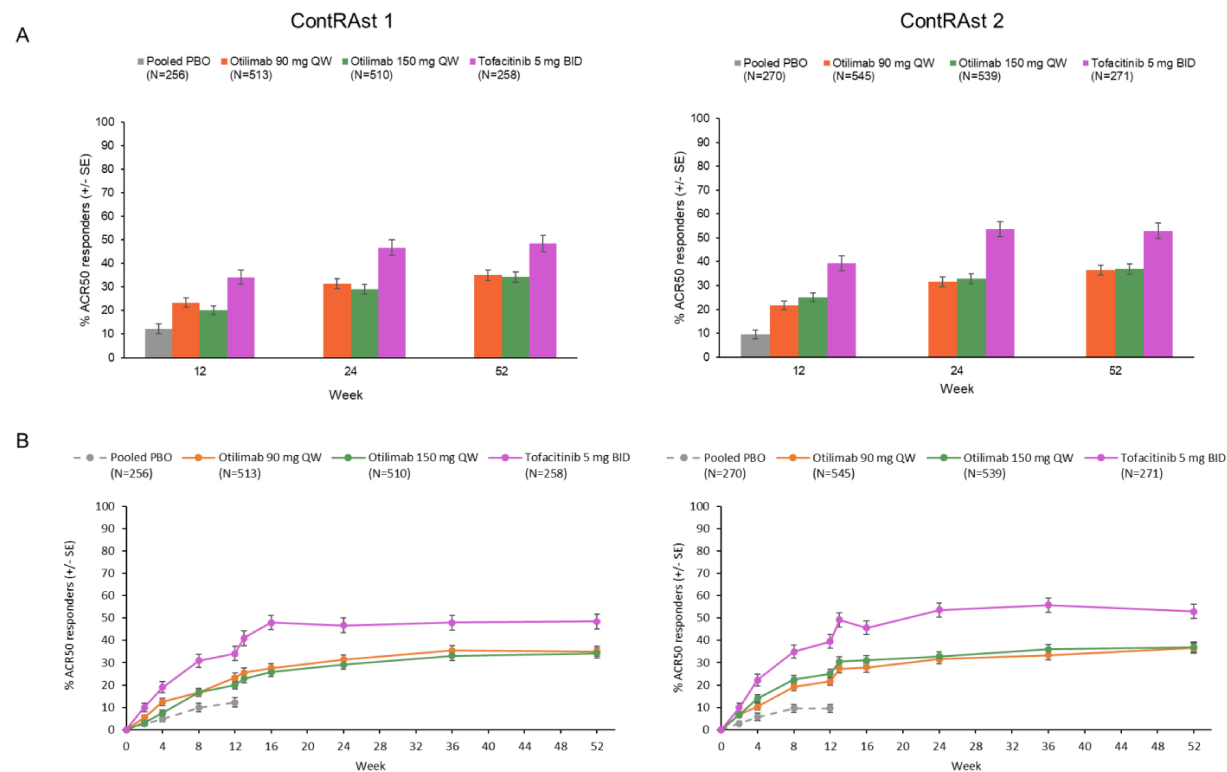

Due to the step-down multiple testing approach, statistical significance was not assessed, or cannot be claimed, for otilimab vs placebo for these endpoints; however, statistical data are provided in the data tables.

ACR, American College of Rheumatology; BID, twice daily; PBO, placebo; QW, once weekly; SE, standard error.

**Supplementary Figure 11.** Proportion of patients achieving ACR70 at A) Week 12, 24 and 52 and B) each assessment visit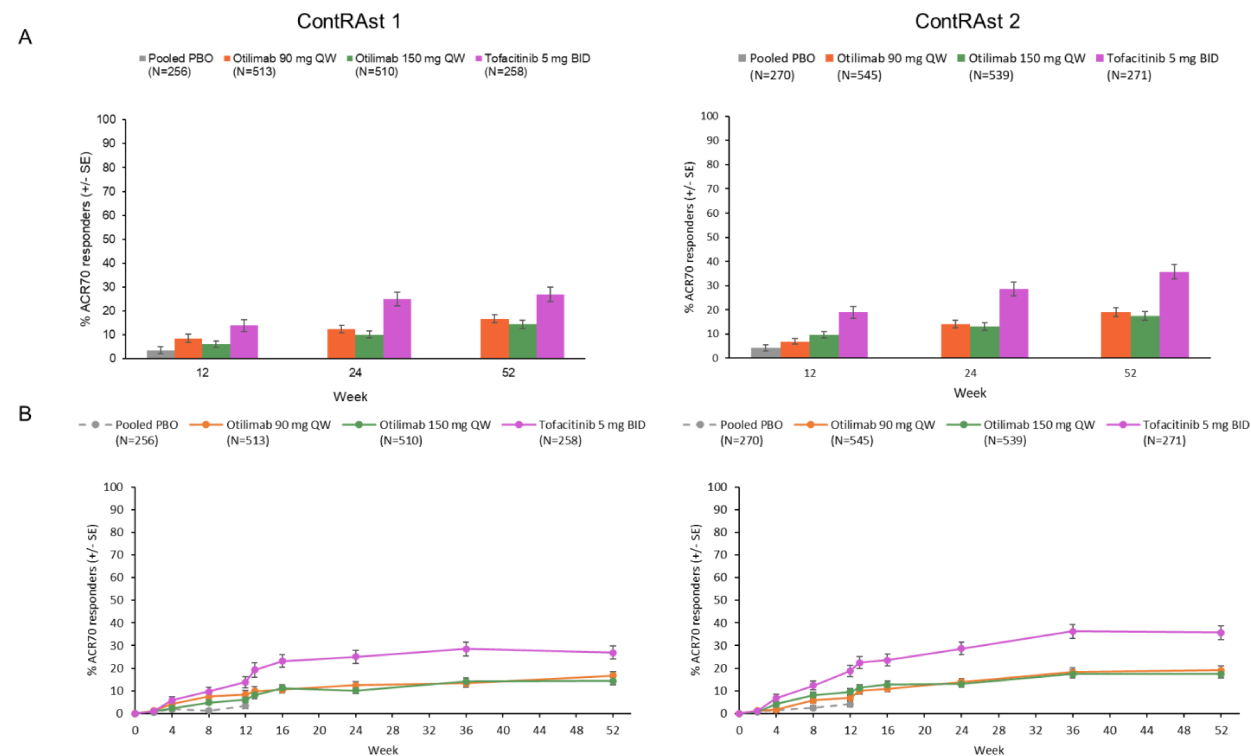

Due to the step-down multiple testing approach, statistical significance was not assessed, or cannot be claimed, for otilimab vs placebo for these endpoints; however, statistical data are provided in the data tables.

ACR, American College of Rheumatology; BID, twice daily; PBO, placebo; QW, once weekly; SE, standard error.



## Supplementary Figure 12. LS mean CFB in A) TJC68, B) SJC66, C) PtGA, D) PhGA and E) CRP

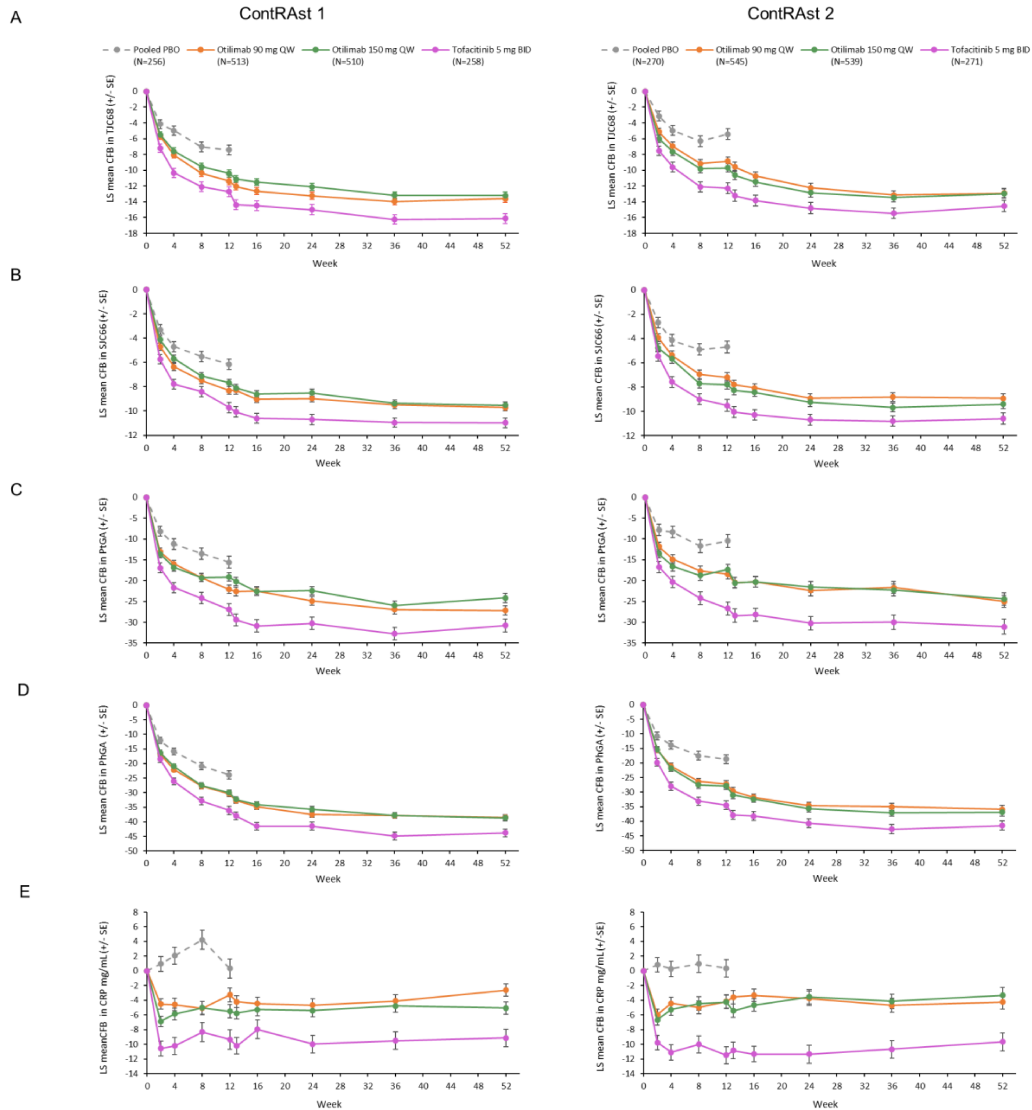

Due to the step-down multiple testing approach, statistical significance was not assessed, or cannot be claimed, for otilimab vs placebo for these endpoints, however, statistical data are provided in the data tables.

BID, twice daily; CFB, change from baseline; CRP, C-reactive protein; LS, least squares; PBO, placebo; PhGA, physician's global assessment; PtGA, patient's global assessment; QW, once weekly; SE, standard error; SJC, swollen joint count; TJC, tender joint count.

**Supplementary Figure 13.** A) LS mean CFB in DAS28-CRP and proportion of patients achieving B) DAS-28 CRP  $\leq 3.2$  and C) DAS28-CRP  $< 2.6$

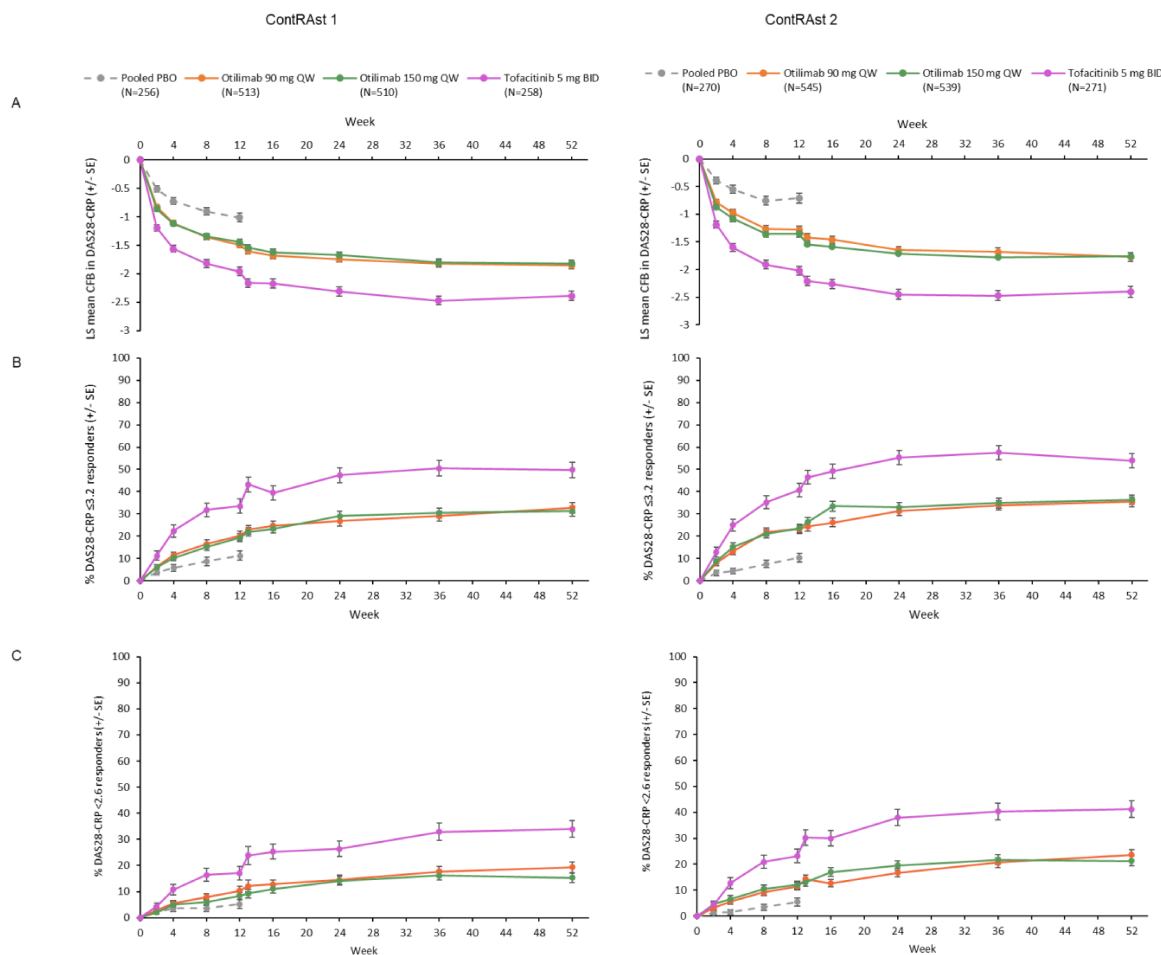

Due to the step-down multiple testing approach, statistical significance was not assessed, or cannot be claimed, for otilimab vs placebo for these endpoints; however, statistical data are provided in the data tables.

BID, twice daily; CFB, change from baseline; CRP, C-reactive protein; DAS28, disease activity score-28 joints; LS, least squares; PBO, placebo; QW, once weekly; SE, standard error.

**Supplementary Figure 14.** A) LS mean CFB in mTSS, and proportion of patients with a LS mean CFB in mTSS of B)  $\leq 0.5$  and C)  $\leq 0$

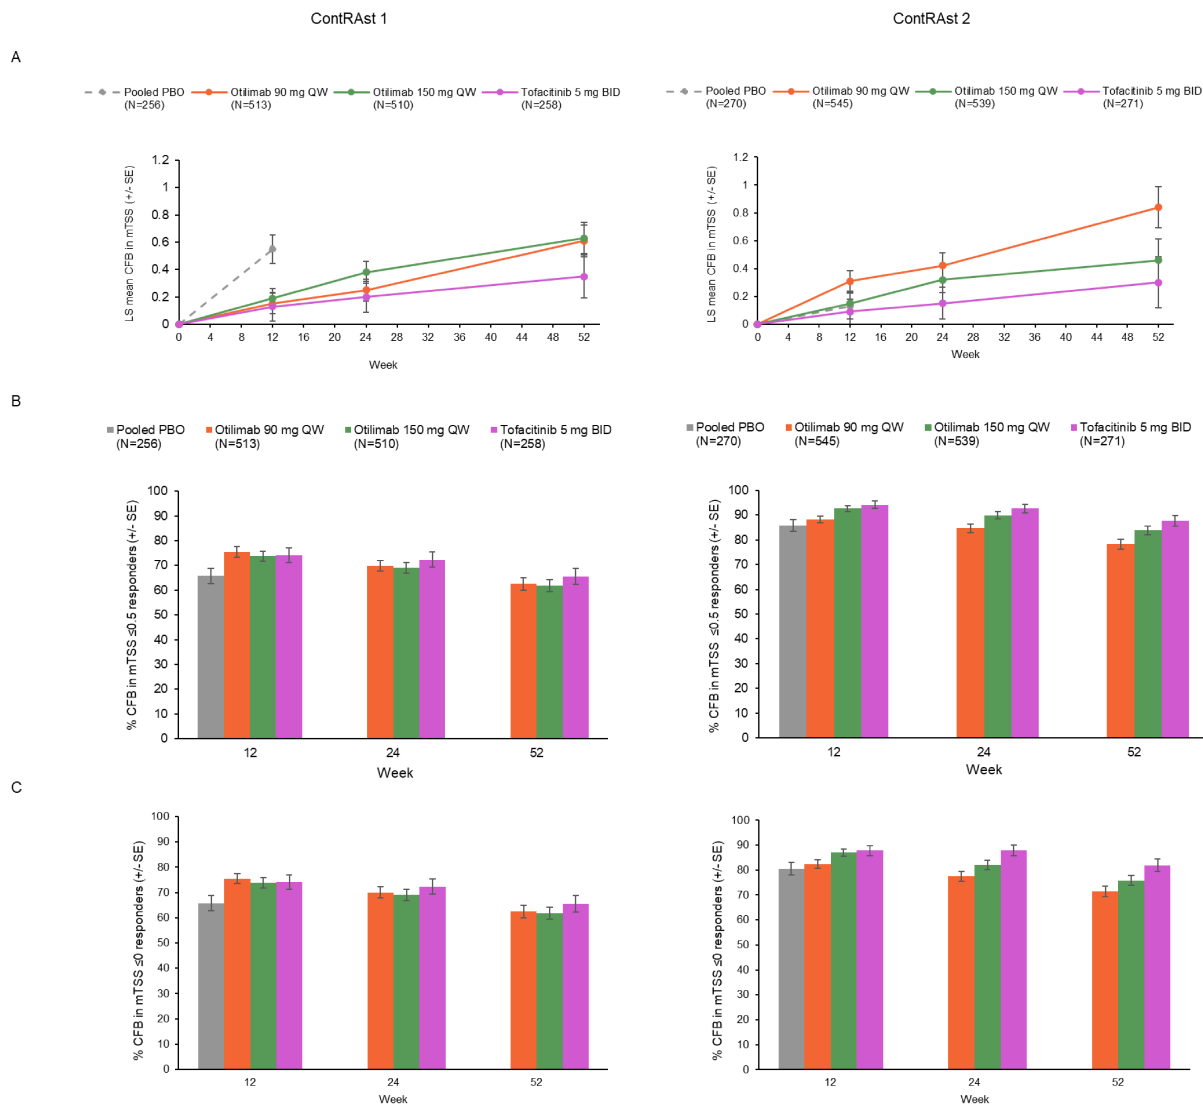

BID, twice daily; CFB, change from baseline; LS, least squares; mTSS, van der Heijde modified total Sharp score; PBO, placebo; QW, once weekly; SE, standard error.

### Supplementary Figure 15. Cumulative probability plots of individual CFB in mTSS at Week 12, 24 and 52 in contrRAst 1

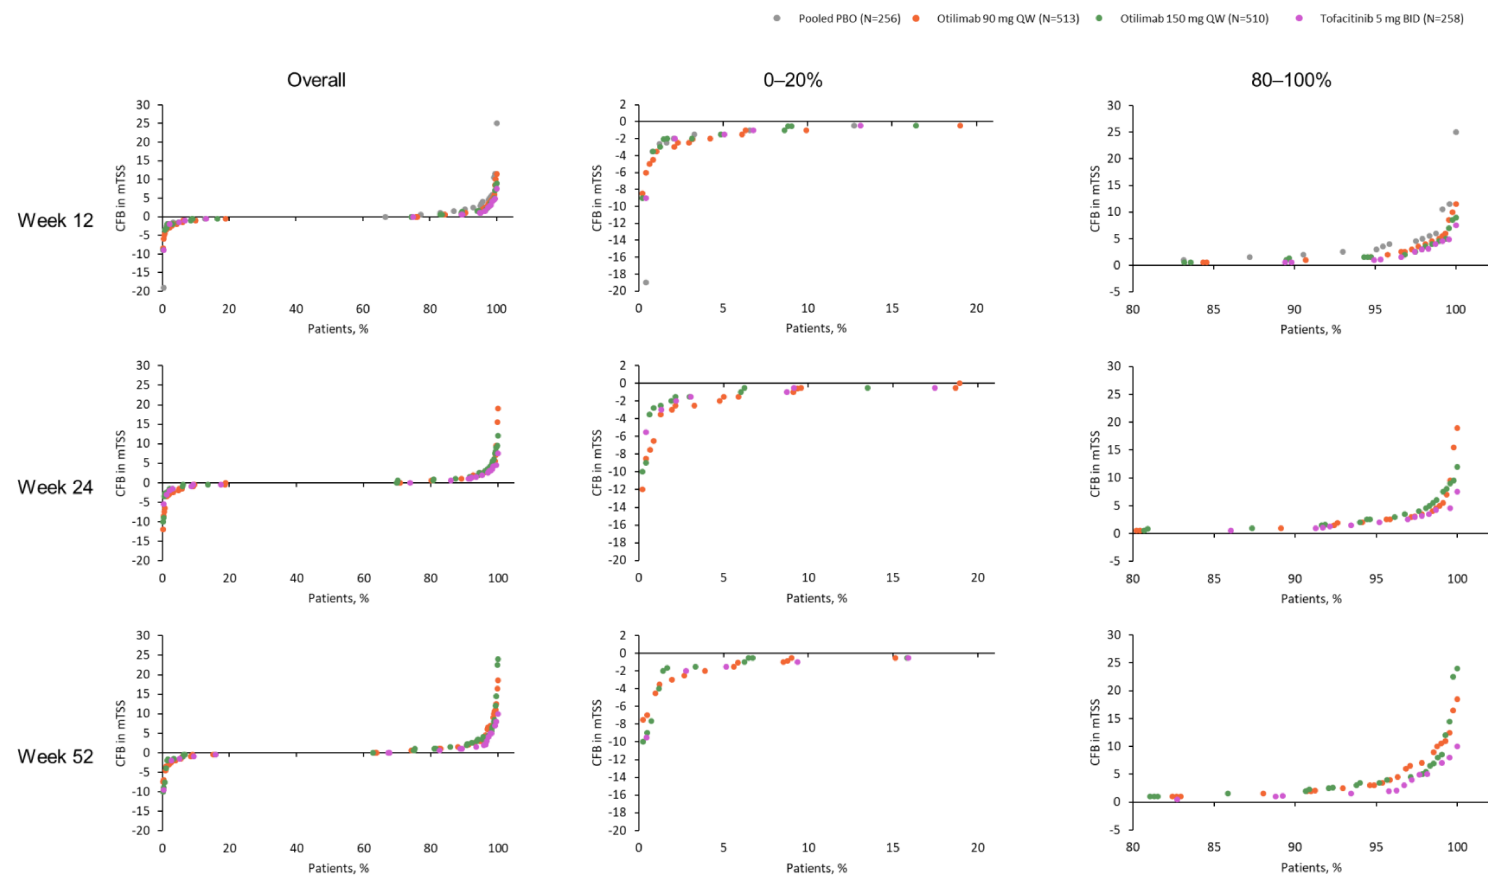

BID, twice daily; CFB, change from baseline; mTSS, van der Heijde modified total Sharp score; PBO, placebo; QW, once weekly.

**Supplementary Figure 16.** Cumulative probability plots of individual CFB in mTSS at Week 12, 24 and 52 in *contRAst* 2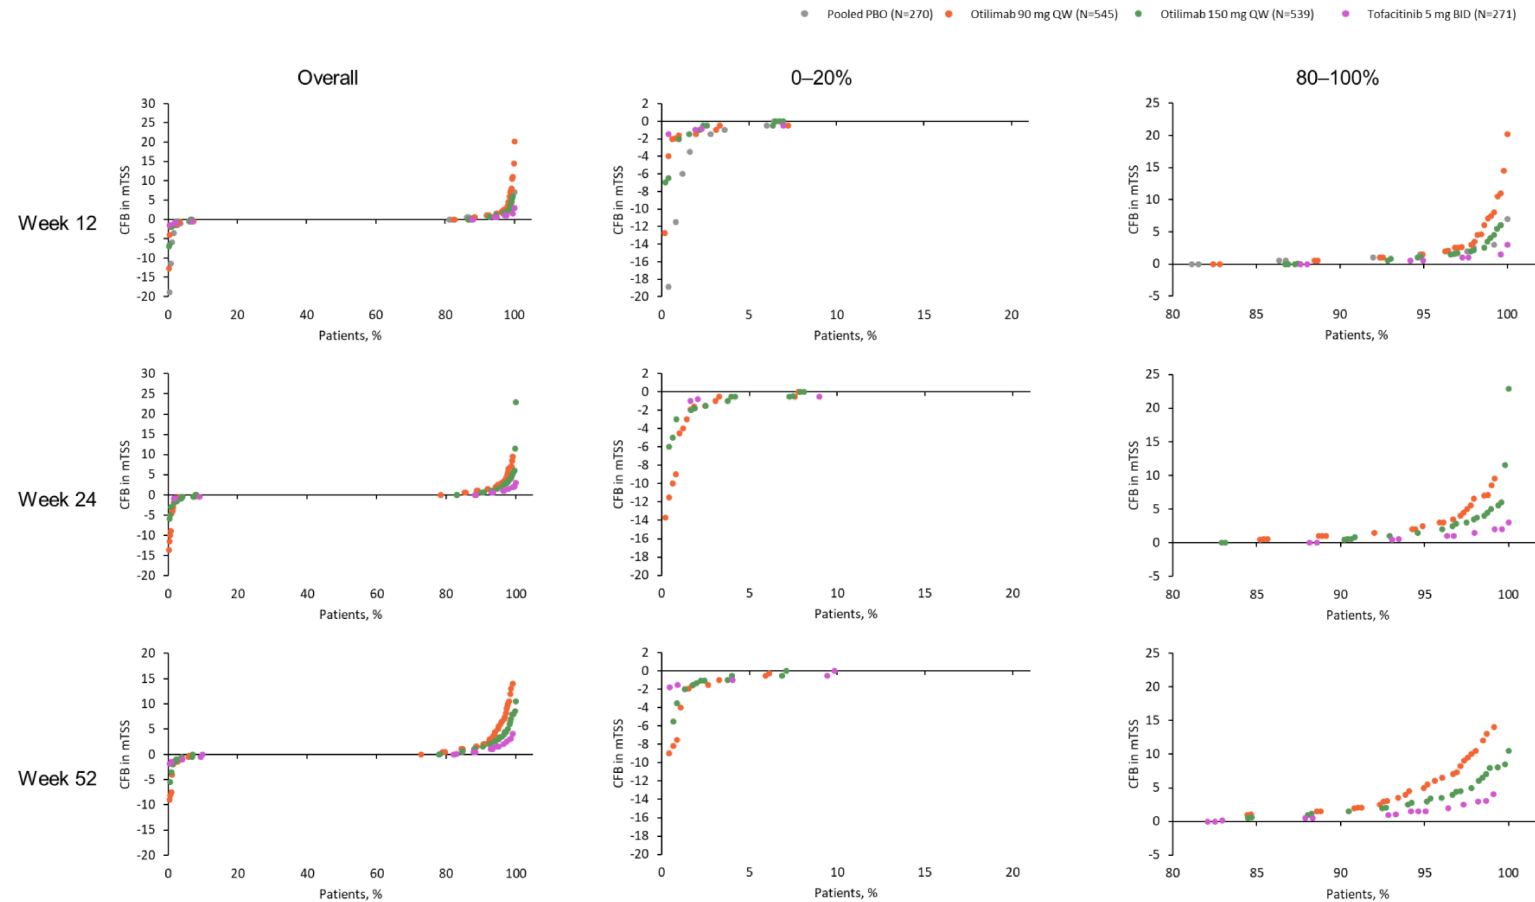

BID, twice daily; CFB, change from baseline; mTSS, van der Heijde modified total Sharp score; PBO, placebo; QW, once weekly.

Supplementary Figure 17. Mean serum otilimab concentrations over time

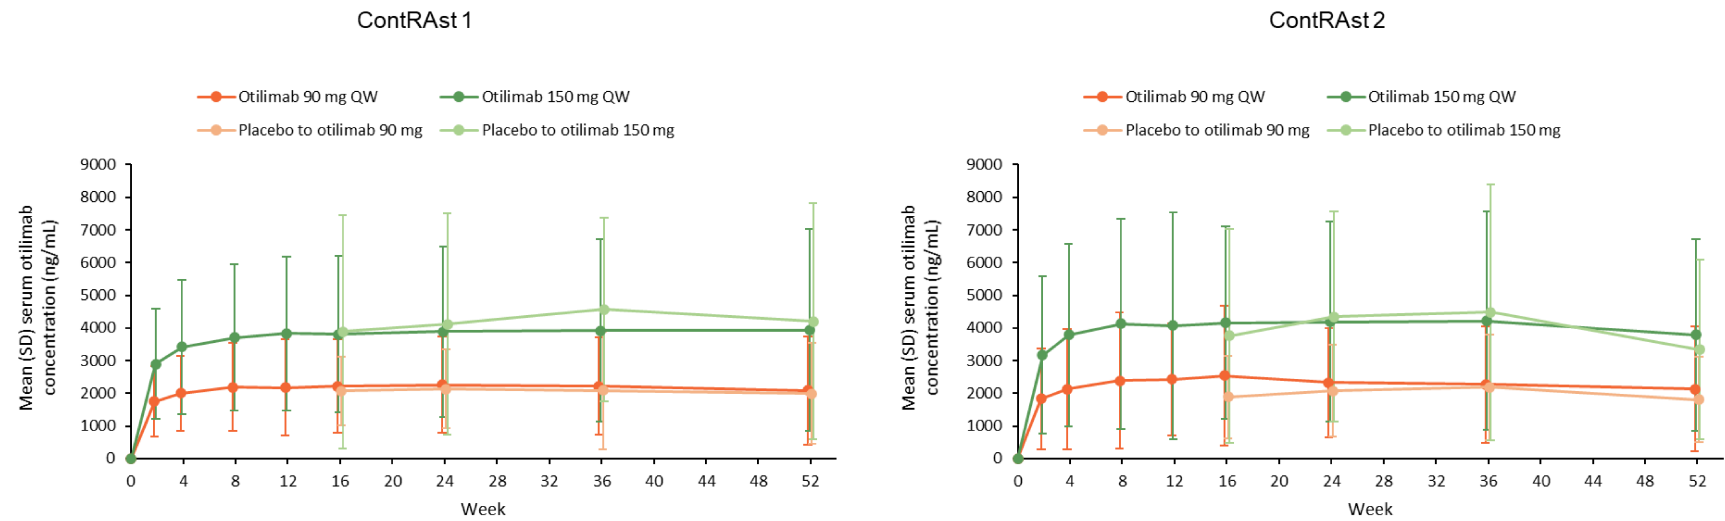

QW, once weekly; SD, standard deviation

**Supplementary Figure 18.** Serum otilimab–GM-CSF complex accumulation over time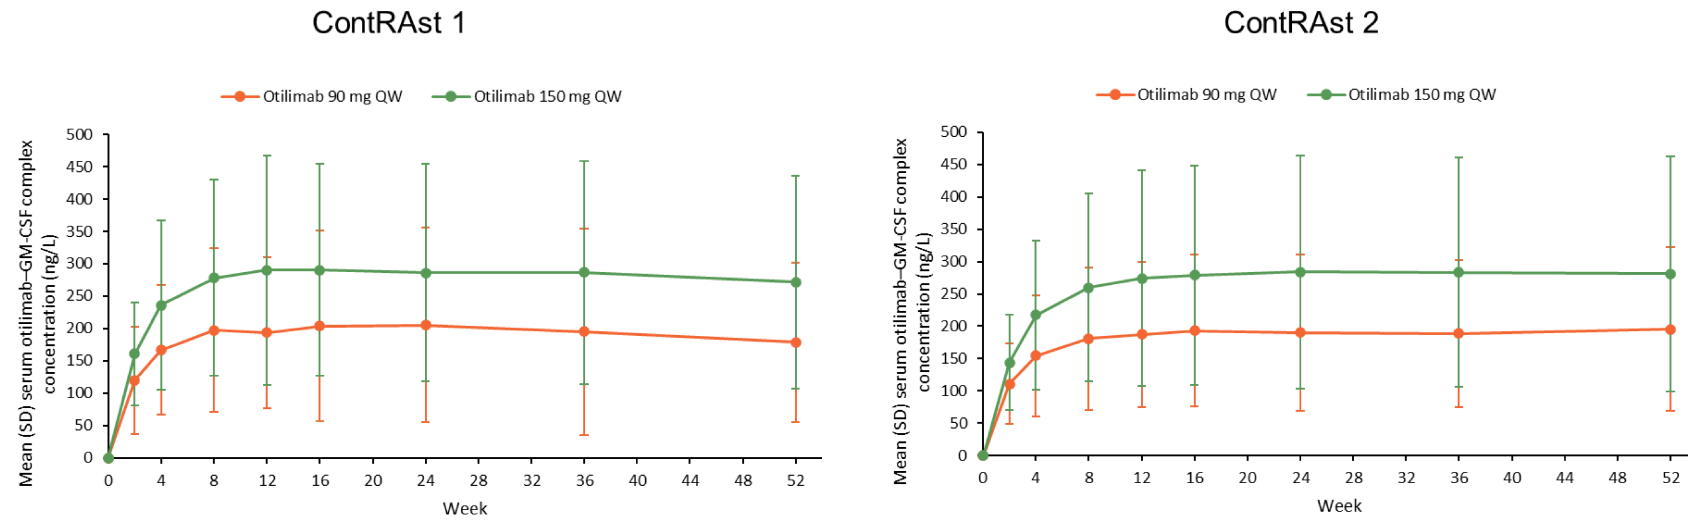

GM-CSF, granulocyte-macrophage colony-stimulating factor; QW, once weekly; SD, standard deviation

## Supplementary Figure 19. CFB in biomarkers up to Week 12

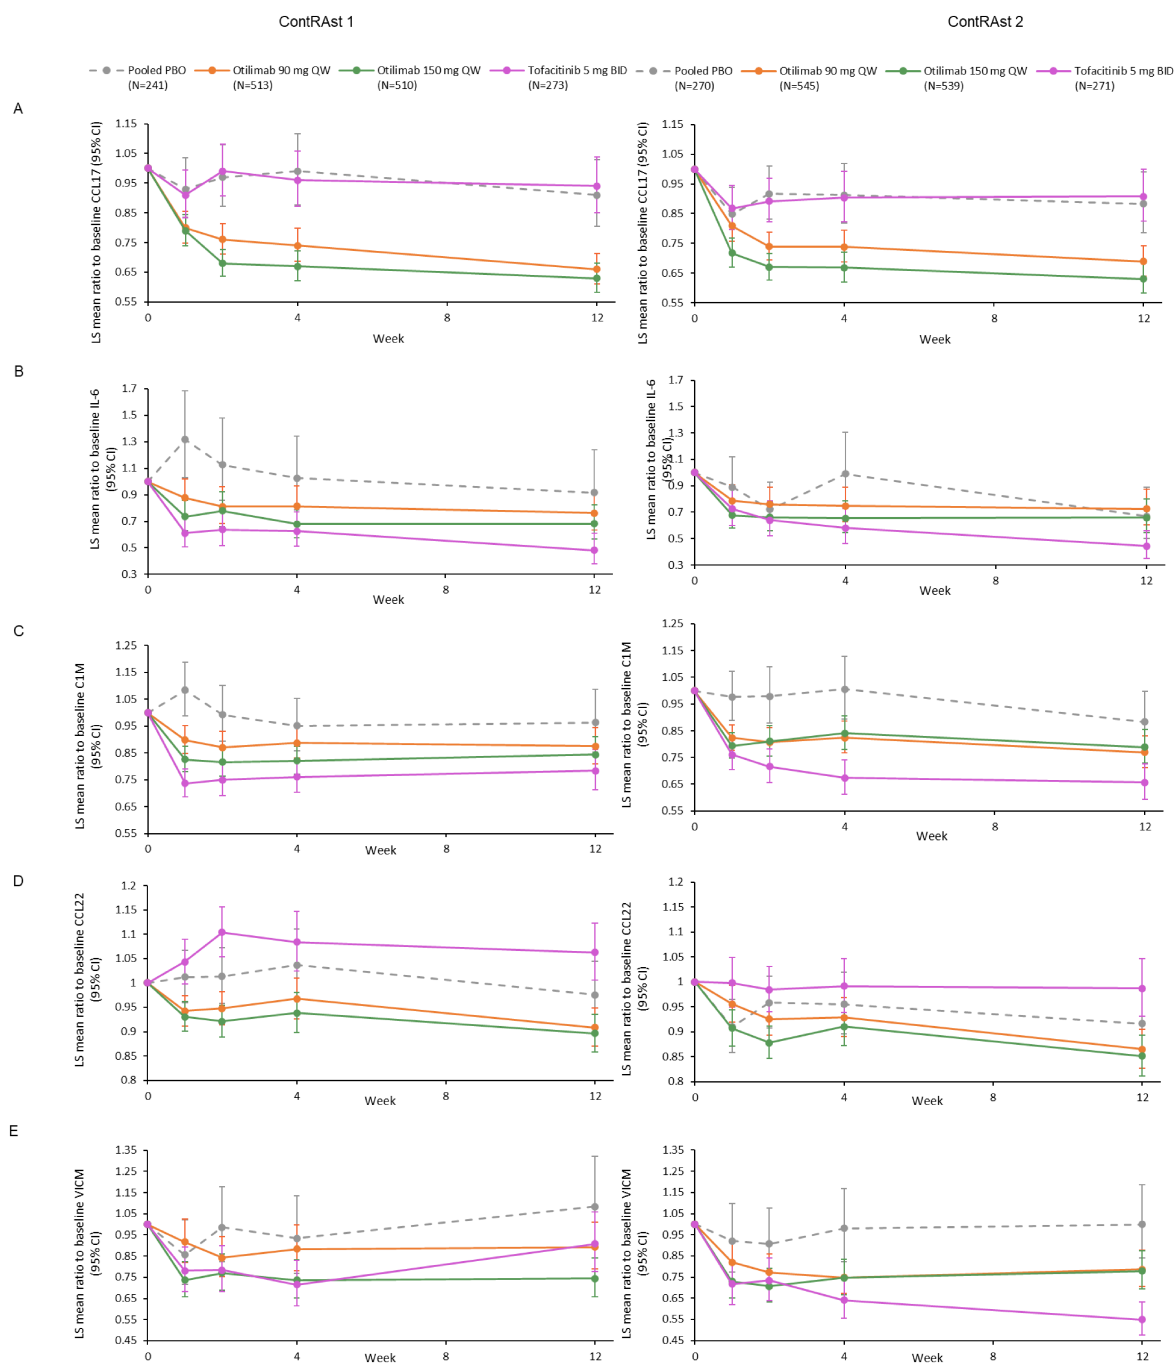

BID, twice daily; C1M, matrix-metalloprotease-degraded Type I collagen, CCL17/22, chemokine (C-C motif) ligand 17/22; CI, confidence interval; CFB, change from baseline; IL-6, interleukin 6; LS, least squares; QW, once weekly; VICM, citrullinated and MMP-degraded vimentin.



**Supplementary Figure 20.** CFB in A) CCL17, B) IL-6, C) CCL22 and D) CRP at Week 12 versus otilimab C<sub>min</sub> quartile

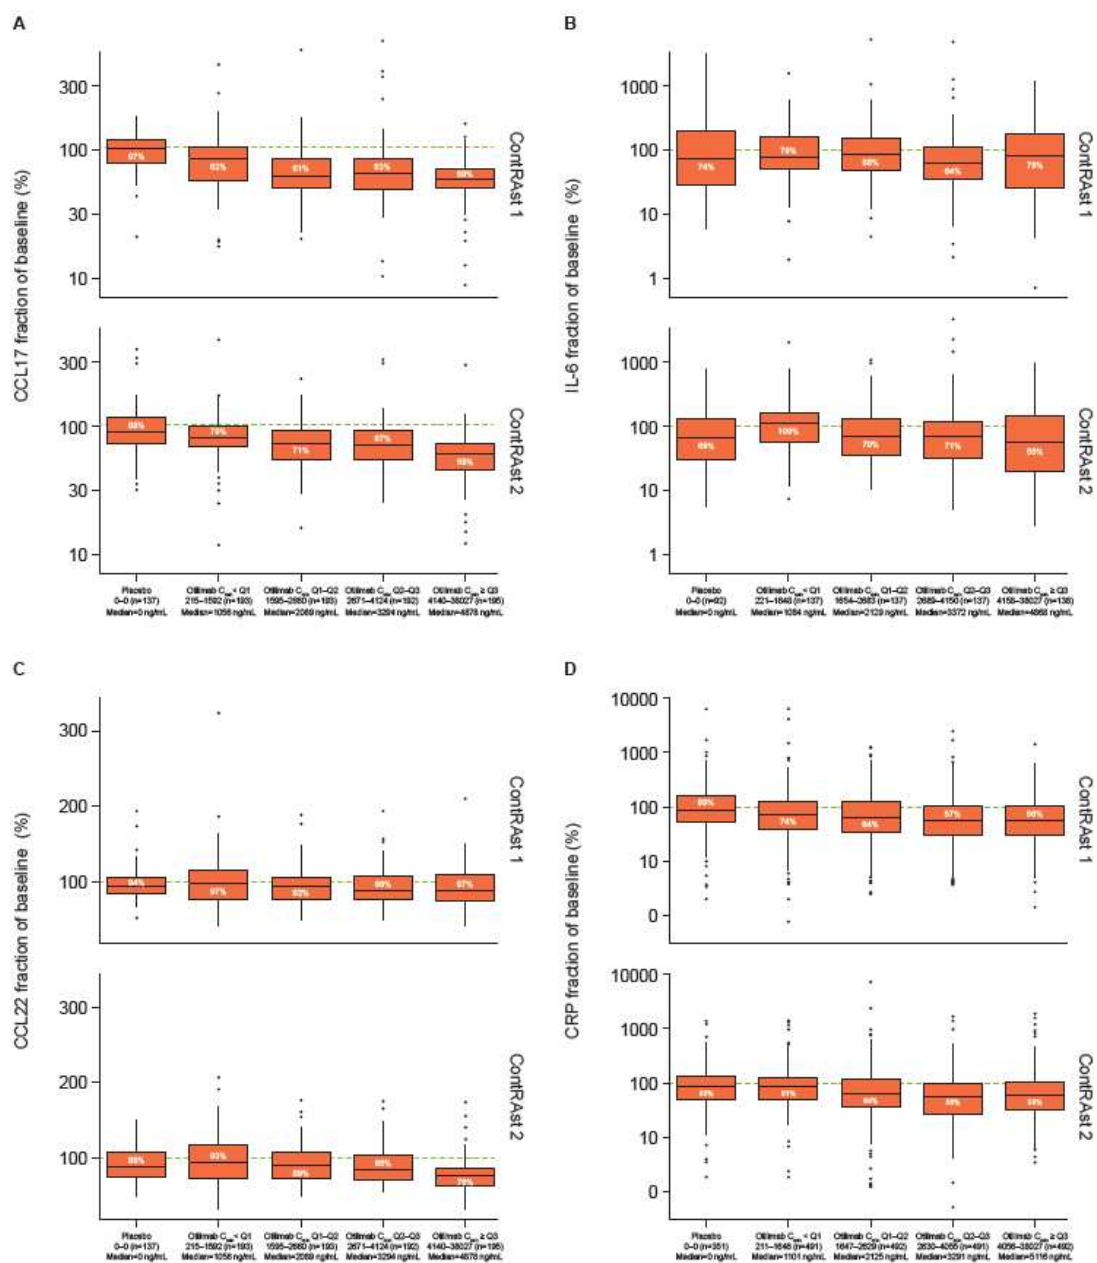

CCL17/22, chemokine (C-C motif) ligand 17/22; CI, confidence interval; CFB, change from baseline; CRP, C-reactive protein; IL-6, interleukin 6.

**Supplementary Table 1.** List of study sites and IEC/IRB

| Description and address of research facility/hospital/institution                                                                                                             | Name and address of IEC/IRB                                                                                                                                                 |
|-------------------------------------------------------------------------------------------------------------------------------------------------------------------------------|-----------------------------------------------------------------------------------------------------------------------------------------------------------------------------|
| <b>ContrAst 1</b>                                                                                                                                                             |                                                                                                                                                                             |
| <b>Argentina</b>                                                                                                                                                              |                                                                                                                                                                             |
| Hospital Privado Centro Medico de Cordoba S.A, Parque Velez Sarsfield, Avenue Naciones Unidas 346, Cordoba, Córdoba, X5016KEH, Argentina                                      | Consejo de Evaluación Ética de la Investigación en Salud, Avenue Velez Sarfield 2311, Area Marron, Oficina 3, Cordoba, Cordoba, 5000, Argentina                             |
| CEMIC, Av Galvan 4102, Ciudad Autonoma de Buenos Aires, Buenos Aires, C1431FWO, Argentina                                                                                     | Comité de Ética en Investigación de CEMIC, Galván 4102, Capital Federal, C1431FWO, Ciudad Autonoma de Buenos Aires, Buenos Aires, 1111, Argentina                           |
| Clinica Adventista Belgrano, Estomba 1710, Ciudad Autonoma Buenos Aires, Buenos Aires, C1430EGF, Argentina                                                                    | Comite Independiente De Etica Luis Maria Zieher, J .E Uriburu 774, Ciudadada Autonoma de Buenos Aires, Buenos Aires, 1111, Argentina                                        |
| Hospital Militar Central " Cirujano Mayor Dr. Cosme Argerich", Reumatologia, Piso 4 Cons 418, Avenue Luis M. Campos 726, Ciudad Autónoma de Buenos Aires, C1426BOR, Argentina | CIREC, A. Luis Maria Campos 726, Ciudad Autonoma de Buenos Aires, Ciudad Autonoma Buenos Aires, C1426BOR, Argentina                                                         |
| Mind Out Research, Jose Pedro Varela - 3901/3954, Ciudad Autonoma Buenos Aires, Buenos Aires, C1417, Argentina                                                                | Comite Independiente De Etica Luis Maria Zieher, J .E Uriburu 774, Ciudadada Autonoma de Buenos Aires, Buenos Aires, 1111, Argentina                                        |
| Hospital Italiano de La Plata, Calle 51 1725 entre 29 y 30, La Plata, Buenos Aires, B1900AXI, Argentina                                                                       | Administración Nacional de Medicamentos, Alimentos y Tecnología Médica (Argentina), Avenida de Mayo 869, Ciudad Autónoma de Buenos Aires, Buenos Aires, C1084AAD, Argentina |
| CORDIS S.A., España 1067, Salta, Salta, A4400ANW, Argentina                                                                                                                   | Administración Nacional de Medicamentos, Alimentos y Tecnología Médica (Argentina), Avenida de Mayo 869, Ciudad Autónoma de Buenos Aires, Buenos Aires, C1084AAD, Argentina |
| Instituto Medico de alta Complejidad San Isidro S.A (IMAC), Avenida Del Libertador 16958, San Isidro, Buenos Aires, 1643, Argentina                                           | Comite de Etica San Isidro, Avenida Libertador 16958, San Isidro, Buenos Aires, B1643CSQ, Argentina                                                                         |
| Aprillus Asistencia e Investigación de Arcis Salud SRL, Avenue Corrientes 2554 2do piso, Ciudad Autonoma de Buenos Aires, Buenos Aires, C1046AAQ, Argentina                   | Comité Independiente de Ética para Ensayos en Farmacología Clínica (FEFyM), Pte. J. E. Uriburu 774 1er Piso, C.A.B.A., Buenos Aires, C1027AAP, Argentina                    |
| Fundacion Respirar, Av. Cabildo 1548 1° A, Ciudad Autonoma de Buenos Aires, Buenos Aires, 1426, Argentina                                                                     | Administración Nacional de Medicamentos, Alimentos y Tecnología Médica (Argentina), Avenida de Mayo 869, Buenos Aires, C1084AAD, Argentina                                  |
| CER San Juan, Laprida 532, San Juan, San Juan, J5402DIL, Argentina                                                                                                            | Comite de Docencia e Investigacion Clinica de CER San Juan, Laprida 568 (E), San Juan, San Juan, J5402DIL, Argentina                                                        |
| Sanatorio Parque S.A., Boulevard Orono 860, Rosario, Santa Fe, S2000DSV, Argentina                                                                                            | Comite Provincial de Bioetica - Ministerio de Salud Provincia de Santa Fe, Maipu 835, 2° piso, Rosario, Santa Fe, Santa Fe, 2000, Argentina                                 |
| CCBR - Buenos Aires - AR, Ruiz Huidobro 4693, Ciudad Autonoma Buenos Aires, Buenos Aires, C1430CKE, Argentina                                                                 | Comite Independiente De Etica Luis Maria Zieher, J .E Uriburu 774, Ciudadada Autonoma de Buenos Aires, Buenos Aires, 1111, Argentina                                        |

|                                                                                                                           |                                                                                                                                                                             |
|---------------------------------------------------------------------------------------------------------------------------|-----------------------------------------------------------------------------------------------------------------------------------------------------------------------------|
| Instituto de Investigaciones Clinicas San Nicolas, Pellegrini 346, San Nicolas, Buenos Aires, B2900DMH, Argentina         | Administración Nacional de Medicamentos, Alimentos y Tecnología Médica (Argentina), Avenida de Mayo 869, Ciudad Autónoma de Buenos Aires, Buenos Aires, C1084AAD, Argentina |
| Sanatorio Alberdi SRL, Absalón Rojas 926/936, Santiago Del Estero, Santiago Del Estero, G4200DYB, Argentina               | Administración Nacional de Medicamentos, Alimentos y Tecnología Médica (Argentina), Avenida de Mayo 869, Ciudad Autónoma de Buenos Aires, Buenos Aires, C1084AAD, Argentina |
| Instituto de Investigaciones Clinicas San Nicolas, Pellegrini 346, San Nicolas, Buenos Aires, B2900DMH, Argentina         | Administración Nacional de Medicamentos, Alimentos y Tecnología Médica (Argentina), Avenida de Mayo 869, Ciudad Autónoma de Buenos Aires, Buenos Aires, C1084AAD, Argentina |
| Sanatorio Alberdi SRL, Absalón Rojas 926/936, Santiago Del Estero, Santiago Del Estero, G4200DYB, Argentina               | Administración Nacional de Medicamentos, Alimentos y Tecnología Médica (Argentina), Avenida de Mayo 869, Ciudad Autónoma de Buenos Aires, Buenos Aires, C1084AAD, Argentina |
| <b>Canada</b>                                                                                                             |                                                                                                                                                                             |
| Aggarwal and Associates Limited, Room 201, 490 Bramalea Road, Brampton, Ontario, L6T 0G1, Canada                          | Western Institutional Review Board, 1019 39th Avenue Southeast, Suite 120, Puyallup, Washington, 98374, Canada                                                              |
| Centre de Recherche Musculo-Squelettique, 1119 Suite. Marguerite Street, Trois-Rivieres, Québec, G8Z 1Y2, Canada          | Western Institutional Review Board, 1019 39th Avenue Southeast, Suite 120, Puyallup, Washington, 98374, Canada                                                              |
| LMC Clinical Research dba Manna Research Inc. Burlington South, 2119 Lakeshore Road, Burlington, Ontario, L7R 1A4, Canada | Western Institutional Review Board, 1019 39th Avenue Southeast, Suite 120, Puyallup, Washington, 98374, Canada                                                              |
| <b>China</b>                                                                                                              |                                                                                                                                                                             |
| China-Japan Union Hospital of Jilin University, Number 148 Ziyou Road, Changchun, 130033, China                           | Ethics Committee of China-Japan Union Hospital of Jilin University, Cardiology Department, Number 148 Ziyou Road, Changchun, Jilin, 130033, China                           |
| Jilin Province People's Hospital, Number 1183 Gongnong Street, Changchun, Jilin, 130021, China                            | Ethics Committee of Jilin Province People's Hospital, Number 1183 Gongnong Street, Changchun, Jilin, 130021, China                                                          |
| The First Affiliated Hospital of Bengbu Medical College, No.287 Changhuai Road, Bengbu, Anhui, 233004, China              | Ethics Committee of The First Affiliated Hospital of Bengbu Medical College, No.287 Changhuai Road, Bengbu, Anhui, 233004, China                                            |
| Jiangxi Pingxiang People's Hospital, Number 8 Wugongshanzhong Dadao, Pingxiang, Jiangxi, 337055, China                    | Ethics Committee of Jiangxi Pingxiang People's Hospital, Number 8 Wugongshanzhong Dadao, Pingxiang, Jiangxi, 337055, China                                                  |
| The Affiliated Hospital of Inner Mongolia Medical University, No.1 North Tongdao Road, Huhehaote, Hohhot, 10050, China    | Ethics Committee of The Affiliated Hospital of Inner Mongolia Medical University, No.1 North Tongdao Road, Huhehaote, Hohhot, 10050, China                                  |
| ZhuZhou Central Hospital, No.116 South Changjiang Road, ZhuZhou, Hunan, 412007, China                                     | Ethics Committee of ZhuZhou Central Hospital, No.116 South Changjiang Road, ZhuZhou, Hunan, 412007, China                                                                   |
| Jiangxi Jiujiang 1st People's Hospital, No48 South Taling Rd, Jiujiang, Jiangxi, 332000, China                            | Ethics Committee of Jiangxi Jiujiang 1st People's Hospital, No48 South Taling Rd, Jiujiang, Jiangxi, 332000, China                                                          |
| Xuzhou Central Hospital, No.199 South Jiefang Road, Xuzhou, Jiangsu, 221009, China                                        | Ethics Committee of Xuzhou Central Hospital, No.199 South Jiefang Road, Xuzhou, Jiangsu, 221009, China                                                                      |

|                                                                                                                              |                                                                                                                                                     |
|------------------------------------------------------------------------------------------------------------------------------|-----------------------------------------------------------------------------------------------------------------------------------------------------|
| West China Hospital, Sichuan University, No.37 Guoxue Lane, Wuhou District, Chengdu, Sichuan, 610041, China                  | Clinical Trial Ethics Committee of West China Hospital, Sichuan University, No.37 Guoxue Alley Chengdu, Chengdu, Sichuan, 610041, China             |
| Yancheng First People's Hospital, No. 66 South Renmin Road, Yancheng, Jiangsu, 224001, China                                 | Medical Ethics Committee of Yancheng First People's Hospital, Number 166 Yulong West Road, Tinghu District, Yancheng, Jiangsu, 224000, China        |
| The Affiliated Hospital of Guilin Medical University, No.15 Lequn Road, Guilin, Guangxi, 541001, China                       | Ethics Committee of The Affiliated Hospital of Guilin Medical University, No.15 Lequn Road, Guilin, Guangxi, 541001, China                          |
| Subei People Hospital, No. 98 West Nantong Road, Yangzhou, 225000, China                                                     | Ethics Committee of Northern Jiangsu People's Hospital, No. 98 West Nantong Road, Yangzhou, Jiangsu, 225001, China                                  |
| Shanghai Huashan Hospital, 12 Wulumuqi Middle Road, Shanghai, 200040, China                                                  | Ethics Committee of Huashan Hospital, Fudan University, No. 12, Urumqi Middle Road, Jing'an District, Shanghai, Shanghai, 200040, China             |
| The First Affiliated Hospital of Sun Yat-sen University, No. 58 Zhongshan Second Road, Guangzhou, 510080, China              | Ethics Committee of The First Affiliated Hospital, Sun Yat-sen University, Number 58 Zhongshan Second Road, Guangzhou, Guangzhou, 510080, China     |
| The Third Xiangya Hospital of Central South University, No 138 Tongzipo Road, Yuelu District, Changsha, Hunan, 410013, China | Ethics Committee of The Third Xiangya Hospital of Central South University, No 138 Tongzipo Road, Yuelu District, Changsha, Hunan, 410013, China    |
| Guanghua Hospital, No.540 Xinhua Road, Shanghai, 200052, China                                                               | Ethics Committee of Guanghua Hospital of Integrated Traditional Chinese and Western Medicine, No.540 Xinhua Road, Shanghai, Shanghai, 200052, China |
| <b>Czechia</b>                                                                                                               |                                                                                                                                                     |
| Fakultní nemocnice Plzeň, Dr. E. Benese 13, Plzeň, 305 99, Czechia                                                           | Fakultní nemocnice Plzeň, Dr. E. Benese 13, Plzeň, 305 99, Czechia                                                                                  |
| MEDICAL PLUS s.r.o., Obchodní 1507, Uherské Hradiště, 686 01, Czechia                                                        | Etická komise pro multicentrické klinické hodnocení Fakultní nemocnice Motole, Dermatovenologické oddělení, V Uvalu 84, Praha 5, 150 06, Czechia    |
| Clintrial s.r.o., Pocerňická 1427/16, Praha 10, 10000, Czechia                                                               | Clintrial s.r.o, Pocerňická 1427/16, Praha 10, 10000, Czechia                                                                                       |
| Fakultní nemocnice v Motole, V Uvalu 84, Prague, 150 06, Czechia                                                             | Etická komise Fakultní nemocnice v Motole pro multicentrická klinická hodnocení, V Uvalu 84, Praha 5, 150 06, Czechia                               |
| Revmatologie s.r.o., Halasovo náměstí 597/1, Brno, 638 00, Czechia                                                           | Etická komise pro multicentrické klinické hodnocení Fakultní nemocnice v Motole, V Uvalu 84, Praha 5, 150 06, Czechia                               |
| Vesalion s.r.o., Bozdechova 619/6, Ostrava, 70200, Czechia                                                                   | Etická komise pro multicentrické klinické hodnocení Fakultní nemocnice v Motole, V Uvalu 84, Praha 5, 150 06, Czechia                               |
| FNsP u sv. Anny v Brně, Pekarská 53, Brno, 65691, Czechia                                                                    | Etická komise Fakultní nemocnice u sv. Anny v Brně, Pekarská 53, Brno, 656 91, Czechia                                                              |
| Affidea Praha s.r.o., Sustova 1930/2, Praha 11, 148 00, Czechia                                                              | Etická komise Fakultní nemocnice v Motole pro multicentrická klinická hodnocení, V Uvalu 84, Praha 5, 150 06, Czechia                               |
| MUDr. Gabriela Simková ordinace lékařů specialistů interní revmatologie, Unhošťská 2533, Kladno, 272 01, Czechia             | Etická komise Revmatologický ústav, Na Slupi, Praha 2, 128 50, Czechia                                                                              |
| Revmatologická ordinace, Tabořská 57, Praha 4, 140 00, Czechia                                                               | Etická komise Fakultní nemocnice v Motole pro multicentrická klinická hodnocení, V Uvalu 84, Praha 5, 150 06, Czechia                               |

|                                                                                                                   |                                                                                                                                            |
|-------------------------------------------------------------------------------------------------------------------|--------------------------------------------------------------------------------------------------------------------------------------------|
| MUDR. Zuzana URBANOVA Revmatologie, Petra Rezka 1090/3, Praha 4 Nusle, 140 00, Czechia                            | Eticka komise pro multicentricke klinicke hodnoceni Fakultni nemocnice v Motole, V Uvalu 84, Praha 5, Czechia                              |
| Revmatologicky ustav, Na Slupi 450/4, Praha 2, 128 50, Czechia                                                    | Eticka komise Revmatologicky ustav, Na Slupi, Praha 2, 128 50, Czechia                                                                     |
| PV-Medical s.r.o., Stefanikova 477, Zlin, 760 01, Czechia                                                         | Eticka komise Fakultni nemocnice v Motole pro multicentricka klinicka hodnoceni, V Uvalu 84, Praha 5, 150 06, Czechia                      |
| <b>Hungary</b>                                                                                                    |                                                                                                                                            |
| Csongrad Megyei Dr. Bugyi Istvan Korhaz, Sima Ferenc u. 44-58., Szentes, 6600, Hungary                            | Egeszsegugyi Tudomanyos Tanacs Klinikai Farmakologiai Etikai Bizottsaga, Alkotmany u.25, H - 1372, Postafioek 450, Budapest, 1054, Hungary |
| Revita Reumatologiai Rendelo, Margit krt. 50-52., Budapest, 1023, Hungary                                         | Egeszsegugyi Tudomanyos Tanacs Klinikai Farmakologiai Etikai Bizottsaga, Alkotmany u.25, H - 1372, Postafioek 450, Budapest, 1054, Hungary |
| Vital Medical Center, Jozsef Attila utca 17, Veszprem, H-8200, Hungary                                            | Egeszsegugyi Tudomanyos Tanacs Klinikai Farmakologiai Etikai Bizottsaga, Alkotmany u.25, H - 1372, Postafioek 450, Budapest, 1054, Hungary |
| Obudai Egészségügyi Centrum Kft, Lajos utca 74-76., Budapest, 1036, Hungary                                       | Egeszsegugyi Tudomanyos Tanacs Klinikai Farmakologiai Etikai Bizottsaga, Alkotmany u.25, H - 1372, Postafioek 450, Budapest, 1054, Hungary |
| Drug Research Center (DRC), Ady Endre street.12, Balatonfured, 8230, Hungary                                      | Egeszsegugyi Tudomanyos Tanacs Klinikai Farmakologiai Etikai Bizottsaga, Alkotmany u.25, H - 1372, Postafioek 450, Budapest, 1054, Hungary |
| Deli Klinika, Kuny Domokos u.13-15, Budapest, 1012, Hungary                                                       | Egeszsegugyi Tudomanyos Tanacs Klinikai Farmakologiai Etikai Bizottsaga, Alkotmany u.25, H - 1372, Postafioek 450, Budapest, 1054, Hungary |
| Szent Borbala Korhaz, Semmelweis u.9., Tatabanya, 2800, Hungary                                                   | Egeszsegugyi Tudomanyos Tanacs Klinikai Farmakologiai Etikai Bizottsaga, Alkotmany u.25, H - 1372, Postafioek 450, Budapest, 1054, Hungary |
| Clinexpert, Kaszásdűlő utca 5, Budapest, 1033, Hungary                                                            | Egeszsegugyi Tudomanyos Tanacs Klinikai Farmakologiai Etikai Bizottsaga, Alkotmany u.25, H - 1372, Postafioek 450, Budapest, 1054, Hungary |
| Principal SMO Kft, Rókus utca 10, Baja, 6500, Hungary                                                             | Egeszsegugyi Tudomanyos Tanacs Klinikai Farmakologiai Etikai Bizottsaga, Alkotmany u.25, H - 1372, Postafioek 450, Budapest, 1054, Hungary |
| DRC Gyógyszervizsgáló Központ Kft., Ady Endre utca 12., Balatonfured, 8230, Hungary                               | Egeszsegugyi Tudomanyos Tanacs Klinikai Farmakologiai Etikai Bizottsaga, Alkotmany u.25, H - 1372, Postafioek 450, Budapest, 1054, Hungary |
| Pest Megyei Flór Ferenc Kórház, Semmelweis Tér 1, Kistarcsa, 2143, Hungary                                        | Egeszsegugyi Tudomanyos Tanacs Klinikai Farmakologiai Etikai Bizottsaga, Alkotmany u.25, H - 1372, Postafioek 450, Budapest, 1054, Hungary |
| Vita Verum Medical Egeszsegugyi Szolgáltato Bt., Building # 95, Berényi út. 72-100, Székesfehérvár, 8000, Hungary | Egeszsegugyi Tudomanyos Tanacs Klinikai Farmakologiai Etikai Bizottsaga, Alkotmany u.25, H - 1372, Postafioek 450, Budapest, 1054, Hungary |
| <b>India</b>                                                                                                      |                                                                                                                                            |

|                                                                                                                                             |                                                                                                                                                                                     |
|---------------------------------------------------------------------------------------------------------------------------------------------|-------------------------------------------------------------------------------------------------------------------------------------------------------------------------------------|
| Sri Nidan Hospital and Hope Fertility Centre, 27, Vidut Nagar A, Jaipur, 302006, India                                                      | Swastic Independent Ethics Committee, B-130, Modi Nagar, Ajmer Road, Jaipur, Rajasthan, 302019, India                                                                               |
| Shree Giriraj Multispeciality Hospital, 27 Navjyot Park Corner, 150 Feet Ring Road, Rajkot, 360005, India                                   | Shree Giriraj Hospital Research Ethics Committee, 150 Feet Ring Rd, 27 Navjyot Park Main Road, Amin marg Cross Road, Rajkot, Gujarat, 360005, India                                 |
| 7-Orange Hospital, Pawana Nagar Housing Society, Pimpri-Chinchwad, 411033, India                                                            | Institutional Ethics Committee of Sai Sneh Hospital and Diagnostic Center, 7 Orange Hospital, Pawana Nagar Housing Society, Pimpri Chinchwad, Pune, Maharashtra, 411033, India      |
| Government Medical College & Shri Sayajirao General Hospital (SSGH), Jail Road, Raopura, Vadodara, Gujarat, 390001, India                   | Institutional Ethics Committee For Human Research Medical College Baroda, Government Medical College, Jail Road, Vadodara, Gujarat, 390001, India                                   |
| Nirmal Hospital Pvt. Ltd., Ring Road, Surat, 395002, India                                                                                  | Nirmal Hospital Private Limited Ethics Committee, Nirmal Hospital Private Limited Ethics Committee, Ring Road, Surat, Gujarat, 395002, India                                        |
| Institute of Post Graduate Medical Education And Research, 244 A.J.C. Bose Road, Kolkata, 700020, India                                     | IPGME&R Research Oversight Committee, 244, Acharya Jagdish Chandra Bose Road, Kolkata, West Bengal, 700020, India                                                                   |
| Sushruta Multispecialty Hospital and Research Centre Pvt. Ltd., Vidyanagar, P. B. Road, Hubli, Karnataka, 580021, India                     | Sushruta Multispeciality Hospital & Res Cen Pvt. Ltd., P. B. Road, Vidyanagar, Hubli, Karnataka 580021, India                                                                       |
| Sujata Birla Hospital & Medical Research Centre, Nashik Pune Highway, Opp. Bytco college, Nashik, 422101, India                             | Yash Society Institutional Ethics Committee, Opp Bytco College, Nashik Pune Road, Nashik, Maharashtra, 422101, India                                                                |
| Suretech Hospital & Research Centre Ltd, 13 A, Banerjee Marg, Dhantoli, Nagpur, 440012, India                                               | Suretech Hospital & Research Centre Ltd., 13-A, Banerjee Marg, Dhantoli, Nagpur, Maharashtra, 440012, India                                                                         |
| Sir Ganga Ram Hospital, Department of Internal Medicine, Rajinder Nagar, Delhi, 110060, India                                               | Sir Ganga Ram Hospital Ethics Committee, Room No 1496. IV Floor, Old Building, Sir Ganga Ram Hospital, Old Rajender Nagar, New Delhi, Delhi, 110060, India                          |
| Maharaja Agrasen Hospital, West Punjabi Bagh, New Delhi, 110026, India                                                                      | Institutional Ethics Committee, Maharaja Agrasen Hospital, New Delhi, Delhi, 110026, India                                                                                          |
| S.R.Kalla Memorial Gastro and General Hospital, 78, Dhuleshwar Garden, Behind HSBC Bank, Sardar Patel Marg, C Scheme, Jaipur, 302001, India | S. R. Kalla Memorial Ethical Committee for Human Research, 78, Dhuleshwar Garden, Behind HDFC Bank, Sardar Patel Marg, C Scheme, Jaipur, Rajasthan, 302001, India                   |
| Deenanath Mangeshkar Hospital and Research Centre, Erandawane, Pune, 411004, India                                                          | Institutional Ethics Committee, Deenanath Mangeshkar Hospital & Research Center, Erandawane, Pune, Maharashtra, 411004, India                                                       |
| Chopda Medicare & Research Centre, Magnum Heart Institute, 3/5 Patil Lane No.1, Laxmi Nagar, Nashik, 422005, India                          | Magna-Care Ethics Committee, Chopda Medicare and Research Centre Pvt.ltd, Magnum Heart Inst, Patil Lane No 1, Near KBH Vidyalaya, Canada Corner, Nashik, Maharashtra, 422005, India |
| Ruby Hall Clinic, Pune, 40 Sasoon Road, Pune, 411001, India                                                                                 | Institutional Ethics Committee, Poona Medical Research Foundation Pune, E4-C to E4-F, 4th Floor, Fifth Avenue, Pune, Maharashtra, 411001, India                                     |
| Synexus Affiliate - B.J. Medical College and Civil Hospital, D-4, OPD Building, Asarwa, Ahmedabad, 380016, India                            | Ethics Committee, B. J. Medical College and Civil Hospital, Asarwa, Gate no. 3, Civil Hospital Road, Ahmedabad, Gujarat, 380016, India                                              |

|                                                                                                                                                     |                                                                                                                                                                  |
|-----------------------------------------------------------------------------------------------------------------------------------------------------|------------------------------------------------------------------------------------------------------------------------------------------------------------------|
| Rheumatic Disease Clinic, 4th Floor, Vedanta Institute of Med Sciences, Ahmedabad, 380009, India                                                    | Avron Multi Speciality Hospitals Ethics Committee, 4, Shantiniketan Park, Nr. Sardar Patel Colony, Ahmedabad, Gujarat, 380013, India                             |
| Lifepoint Multispecialty Hospital, Sr. No.145-1, Mumbai Bypass Road, Near Hotel Sayaji, Pune, 411057, India                                         | Life Point - Ethics Committee, Lifepoint Multispeciality Hospital Pvt. Ltd, 145/1, Mumbai-Bangalore Highway, Wakad, Pune, Maharashtra, 411057, India             |
| Shree Hospital & Critical Care Centre, 799, Omnagar, Sakkardara Square, Umred Road, Nagpur, 440009, India                                           | Shree Hospital Ethics Committee, Nagpur, Maharashtra, 440009, India                                                                                              |
| St. Theresas Hospital, Sanathnagar, Hyderabad, 500018, India                                                                                        | Ethics Committee St. Theresa's Hospital, Erragadda, Sanath Nagar, Hyderabad, Andhra Pradesh, 500018, India                                                       |
| Sterling Hospital, Opp. Inox Multiplex, Race course Circle (West), Vadodara, 390007, India                                                          | Sterling Ethics Committee, 4th Floor, Phase-1, Sterling Hospital, Opp. Inox, Race Course Circle (West), Vadodara, Gujarat, 390007, India                         |
| Swastik Rheumatology Clinic, B101 (office) Shilp Aaron, Ahmedabad, 380054, India                                                                    | Sangini Hospital Ethics Committee, 206-8, Sangini Complex, Near Parimal Garden, Ambawadi, Ellisbridge, Ahmedabad, Gujarat, 380006, India                         |
| Avron Hospitals, Near Sardar Patel Colony, 4, Shantiniketan Park, Ahmedabad, 380013, India                                                          | Avron Multi Speciality Hospitals Ethics Committee, 4, Shantiniketan Park, Nr. Sardar Patel Colony, Ahmedabad, Gujarat, 380013, India                             |
| Panchsheel Hospital, Near Sabarmati Police Station, High-Way, Ramnagar, Ahmedabad, 380005, India                                                    | Panchshil Institutional Ethics Committee, Ahmedabad, Gujarat, 380007, India                                                                                      |
| JSS Medical College, Mahathma Gandhi Road, Jagadguru Sri Shivaratheeshwara Hospital, Mysore, 570004, India                                          | Institutional Ethics Committee, JSS Medical College & Hospital, B. M. Road, Sri Shivarathreeshwara Nagara, New Banimantap Extn, Mysore, Karnataka, 570015, India |
| KLES Dr. Prabhakar Kore Hospital & MRC, Nehru Nagar, Belagavi, 590010, India                                                                        | Ethics Committee of the KLE University, Nehru Nagar, JNMC Campus, Belgaum, Karnataka, 590010, India                                                              |
| <b>Italy</b>                                                                                                                                        |                                                                                                                                                                  |
| Azienda Ospedaliera Universitaria Integrata Verona (Ospedale Borgo Trento), Reumatologia, Piazzale Aristide Stefani 1, Verona, Verona, 37126, Italy | Comitato Etico per la Sperimentazione Clinica delle Provincie di Verona e Rovigo, P.le Stefani, 1, Verona, Verona, 37126, Italy                                  |
| <b>Latvia</b>                                                                                                                                       |                                                                                                                                                                  |
| Riga Eastern Clinical University Hospital, Hipokrata street .2, Riga, LV 1038, Latvia                                                               | Ethics Committee for Clinical Trials of Medicinal Products, Aizkraukles street 21 – 113, Riga, LV1006, Latvia                                                    |
| M & M Centre, Gaujas Street 11, Adazi, LV2164, Latvia                                                                                               | Ethics Committee for Clinical Trials of Medicinal Products, Aizkraukles street 21 – 113, Riga, LV1006, Latvia                                                    |
| Dainas Saulites-Kandevicas private practice in Cardiology and Rheumatology, Aldaru 20/24, Liepaja, LV-3401, Latvia                                  | Ethics Committee for Clinical Trials of Medicinal Products, Aizkraukles street 21 – 113, Riga, LV1006, Latvia                                                    |
| <b>Lithuania</b>                                                                                                                                    |                                                                                                                                                                  |
| Siauliai Republican Hospital, Public Institution, V.Kudirkos g. 99, Siauliai, 76231, Lithuania                                                      | Lithuanian Bioethics Committee, Studentu street. 45A, Vilnius, LT-08107, Lithuania                                                                               |
| Klaipeda University Hospital, Liepojos g. 41, Klaipeda, LT-92288, Lithuania                                                                         | Lithuanian Bioethics Committee, Studentu street. 45A, Vilnius, LT-08107, Lithuania                                                                               |
| Kaunas District Hospital, Department of Rheumatology, Hipodromo 13, Kaunas, LT-45130, Lithuania                                                     | Lithuanian Bioethics Committee, Studentu street. 45A, Vilnius, LT-08107, Lithuania                                                                               |

|                                                                                                                           |                                                                                                                                               |
|---------------------------------------------------------------------------------------------------------------------------|-----------------------------------------------------------------------------------------------------------------------------------------------|
| Centro Outpatient Clinic, Pylimo street. 3/1, Vilnius, LT-01117, Lithuania                                                | Lithuanian Bioethics Committee, Studentu street. 45A, Vilnius, LT-08107, Lithuania                                                            |
| VAKK, JSC, Gaiziunu g. 3a, Kaunas, LT-50128, Lithuania                                                                    | Lithuanian Bioethics Committee, Studentu street. 45A, Vilnius, LT-08107, Lithuania                                                            |
| <b>Malaysia</b>                                                                                                           |                                                                                                                                               |
| Hospital Sibul, Bt. 5 1/2, Sibul, 96000, Malaysia                                                                         | Medical Research Ethics Committee-UMMC, Lembah Pantai, Kuala Lumpur, 59100, Malaysia                                                          |
| Hospital Tengku Ampuan Rahimah, Lebuhraya Selayang-Kepong, Batu Caves, Batu Caves, 68100, Malaysia                        | Medical Research Ethics Committee-UMMC, Lembah Pantai, Kuala Lumpur, 59100, Malaysia                                                          |
| Tuanku Ja'afar Hospital, Jalan Rasah, Seremban, Negeri Sembilan, 70300, Malaysia                                          | Medical Research Ethics Committee-UMMC, Lembah Pantai, Kuala Lumpur, 59100, Malaysia                                                          |
| University Malaya Medical Centre, Clinical Investigation Centre, 5th Floor, Menara Timur, Kuala Lumpur, 59100, Malaysia   | Medical Research Ethics Committee-UMMC, Lembah Pantai, Kuala Lumpur, 59100, Malaysia                                                          |
| Hospital Selayang, Lebuhraya Selayang-Kepong, Batu Caves, 68100, Malaysia                                                 | Medical Research Ethics Committee-UMMC, Lembah Pantai, Kuala Lumpur, 59100, Malaysia                                                          |
| Sarawak General Hospital, Jalan Tun Ahmad Zaidi Aduce, Kuching, 93586, Malaysia                                           | Medical Research Ethics Committee-UMMC, Lembah Pantai, Kuala Lumpur, 59100, Malaysia                                                          |
| <b>Mexico</b>                                                                                                             |                                                                                                                                               |
| Diseño y Planeacion en Investigacion Medica S.C., Col Arcos Vallarta, Morelos 2203, Guadalajara, Jalisco, 44130, Mexico   | Comite de Etica, Investigacion Biomedica para el Desarrollo de Farmacos, Calzada Club Atlas No.16,Col. Country Club,v, Jalisco, 45680, Mexico |
| Centro de Investigacion Clinica de Morelia SC, Virrey de Mendoza No 1998-621, Morelia, Michoacán, 58070, Mexico           | COFEPRIS, Oklahoma 14, Col. Nápoles, Delegación Benito Juárez, Mexico, 03810, Mexico                                                          |
| Mexico Centre for Clinical Research S.A de C.V, Amores 709 Col. Del Valle, 3100, Mexico                                   | MCCR Comité de Ética del México Center for Clinical Research, Amores N° 709 Col del Valle Delegacion Benito Juarez, México DF, 3100, Mexico.  |
| Hospital Aranda de la Parra, Hidalgo 329, Leon, Guanajuato, 37000, Mexico                                                 | COFEPRIS, Oklahoma 14, Col. Nápoles, Delegación Benito Juárez, Mexico, 03810, Mexico                                                          |
| Trials in Medicine S.C., Alvaro Obregon 121 piso 15 oficina 1504, Mexico, 6700, Mexico                                    | COFEPRIS, Oklahoma 14, Col. Nápoles, Delegación Benito Juárez, Mexico, 03810, Mexico                                                          |
| Centro de Investigacion y Atencion Integral Durango CIAID, Paseo de Los Pinos 617, Durango, Durango, 34270, Mexico        | COFEPRIS, Oklahoma 14, Col. Nápoles, Delegación Benito Juárez, Mexico, 03810, Mexico                                                          |
| Centro Medico del Angel, Col. Zona Centro, Av Lerdo No. 1025--1 Entre B y C, Mexicali, Baja California Sur, 21100, Mexico | COFEPRIS, Oklahoma 14, Col. Nápoles, Delegación Benito Juárez, Mexico, 03810, Mexico                                                          |
| <b>Poland</b>                                                                                                             |                                                                                                                                               |
| Centrum Kliniczno-Badawcze Lekarze Spółka Partnerska, Ul. Studzienna 35-36/A, Elblag, 82-300, Poland                      | Kom Bioet przy Okręgowej Izbie Lek,arskiej Wielkopolskiej Izby Lekarskiej, ul. Nowowiejskiego 51, Poznań, 61-734, Poland                      |
| Reumed Zespol Poradni Specjalistycznych Filia nr 2, ul. Onyksowa 10, Lublin, 20-582, Poland                               | Kom Bioet przy Okręgowej Izbie Lekarskiej Wielkopolskiej Izby Lekarskiej, Nowowiejskiego, Poznań, 61-734, Poland                              |
| KO-MED Centra Kliniczne Sp. z o.o., 11 Listopada 78, Staszow, 28-200, Poland                                              | Kom Bioet przy Okręgowej Izbie Lekarskiej Wielkopolskiej Izby Lekarskiej, Nowowiejskiego, Poznań, 61-734, Poland                              |



|                                                                                                 |                                                                                                                  |
|-------------------------------------------------------------------------------------------------|------------------------------------------------------------------------------------------------------------------|
| Synexus Polska Sp. z o.o. Oddział w Gdyni, ul. Luzycka 3c, Gdynia, 81-537, Poland               | Kom Bioet przy Okręgowej Izbie Lekarskiej Wielkopolskiej Izby Lekarskiej, Nowowiejskiego, Poznań, 61-734, Poland |
| Synexus Polska Sp. z o.o., ul. Konckiego 3, Katowice, 40-040, Poland                            | Kom Bioet przy Okręgowej Izbie Lekarskiej Wielkopolskiej Izby Lekarskiej, Nowowiejskiego, Poznań, 61-734, Poland |
| Synexus Polska sp. z o.o. Oddział w Poznaniu, ul. Głogowska 31/33, Poznan, 60-702, Poland       | Kom Bioet przy Okręgowej Izbie Lekarskiej Wielkopolskiej Izby Lekarskiej, Nowowiejskiego, Poznań, 61-734, Poland |
| Nasz Lekarz Przychodnie Medyczne, ul. Stefana Batorego 18-22, Torun, 87-100, Poland             | Kom Bioet przy Okręgowej Izbie Lekarskiej Wielkopolskiej Izby Lekarskiej, Nowowiejskiego, Poznań, 61-734, Poland |
| Solumed s.c, ul. Dąbrowskiego 77, Poznan, 60-101, Poland                                        | Kom Bioet przy Okręgowej Izbie Lekarskiej Wielkopolskiej Izby Lekarskiej, Nowowiejskiego, Poznań, 61-734, Poland |
| Synexus Polska Sp. z o.o. Oddział w Łodzi, ul. Składowa 35, Łodz, 90-127, Poland                | Kom Bioet przy Okręgowej Izbie Lekarskiej Wielkopolskiej Izby Lekarskiej, Nowowiejskiego, Poznań, 61-734, Poland |
| Globe Badania Kliniczne, UL. KUSOCINSKIEGO 3A, Klodzko, 57-300, Poland                          | Kom Bioet przy Okręgowej Izbie Lekarskiej Wielkopolskiej Izby Lekarskiej, Nowowiejskiego, Poznań, 61-734, Poland |
| Narodowy Instytut Geriatrii, ul. Spartanska 1, Warszawa, 02-672, Poland                         | Kom Bioet przy Okręgowej Izbie Lekarskiej Wielkopolskiej Izby Lekarskiej, Nowowiejskiego, Poznań, 61-734, Poland |
| Amicare Sp. z o.o. Sp.k, ul. gen. Lucjana Zeligowskiego 46 lok. 10, Łodz, 90-644, Poland        | Kom Bioet przy Okręgowej Izbie Lekarskiej Wielkopolskiej Izby Lekarskiej, Nowowiejskiego, Poznań, 61-734, Poland |
| Twoja Przychodnia - Centrum Medyczne Nowa Sol, ul. Głowackiego 8D / 2, Nowa Sol, 67-100, Poland | Kom Bioet przy Okręgowej Izbie Lekarskiej Wielkopolskiej Izby Lekarskiej, Nowowiejskiego, Poznań, 61-734, Poland |
| Centrum Medyczne Oporow, Solskiego 4A/1, Wrocław, 52-416, Poland                                | Kom Bioet przy Okręgowej Izbie Lekarskiej Wielkopolskiej Izby Lekarskiej, Nowowiejskiego, Poznań, 61-734, Poland |
| ClinicMed Daniluk, Nowak Spółka Jawna, ul. Stoleczna 7 lok. 200, Białystok, 15-879, Poland      | Kom Bioet przy Okręgowej Izbie Lekarskiej Wielkopolskiej Izby Lekarskiej, Nowowiejskiego, Poznań, 61-734, Poland |
| Centrum Medyczne Pratia Gdynia, Chrzanowskiego 3/5, Gdynia, 81-338, Poland                      | Kom Bioet przy Okręgowej Izbie Lekarskiej Wielkopolskiej Izby Lekarskiej, Nowowiejskiego, Poznań, 61-734, Poland |
| ETYKA Ośrodek Badan Klinicznych, ul. 1 Maja 13, Olsztyn, 10-117, Poland                         | Kom Bioet przy Okręgowej Izbie Lekarskiej Wielkopolskiej Izby Lekarskiej, Nowowiejskiego, Poznań, 61-734, Poland |
| Centrum Badan Klinicznych S.C., ul. Sniadeckich 7/2, Poznan, 60-773, Poland                     | Kom Bioet przy Okręgowej Izbie Lekarskiej Wielkopolskiej Izby Lekarskiej, Nowowiejskiego, Poznań, 61-734, Poland |
| Centrum Medyczne All-Med, ul. Henryka Sienkiewicza 23, Krakow, 30-033, Poland                   | Kom Bioet przy Okręgowej Izbie Lekarskiej Wielkopolskiej Izby Lekarskiej, Nowowiejskiego, Poznań, 61-734, Poland |
| NZOZ OSTEO-MEDIC, Wiejska 81, Białystok, 15-351, Poland                                         | Kom Bioet przy Okręgowej Izbie Lekarskiej Wielkopolskiej Izby Lekarskiej, Nowowiejskiego, Poznań, 61-734, Poland |
| KO-MED Centra Kliniczne Zamosc, ul. Peowiakow 1, Zamosc, 22-400, Poland                         | Kom Bioet przy Okręgowej Izbie Lekarskiej Wielkopolskiej Izby Lekarskiej, Nowowiejskiego, Poznań, 61-734, Poland |
| Rheuma Medicus Zakład Opieki Zdrowotnej, ul. Pruszkowska 6, Warszawa, 02-118, Poland            | Kom Bioet przy Okręgowej Izbie Lekarskiej Wielkopolskiej Izby Lekarskiej, Nowowiejskiego, Poznań, 61-734, Poland |

|                                                                                                                                                      |                                                                                                                                               |
|------------------------------------------------------------------------------------------------------------------------------------------------------|-----------------------------------------------------------------------------------------------------------------------------------------------|
| Synexus Polska sp. z o.o. Oddział we Wrocławiu, Ul. Marii. Curie-Skłodowskiej 12, Wrocław, 50-381, Poland                                            | Kom Bioet przy Okręgowej Izbie Lekarskiej Wielkopolskiej Izby Lekarskiej, Nowowiejskiego, Poznań, 61-734, Poland                              |
| 1 Wojskowy Szpital Kliniczny w Lublinie, al. Raclawickie 23, Lublin, 20-049, Poland                                                                  | Kom Bioet przy Okręgowej Izbie Lekarskiej Wielkopolskiej Izby Lekarskiej, Nowowiejskiego, Poznań, 61-734, Poland                              |
| Silmedic sp. z o.o., ul. Sikorskiego 30 lok 70, Katowice, 40-282, Poland                                                                             | Kom Bioet przy Okręgowej Izbie Lekarskiej Wielkopolskiej Izby Lekarskiej, Nowowiejskiego, Poznań, 61-734, Poland                              |
| NBR Polska Tomasz Kłodawski, ul. 29 Listopada 18A lok. 4, Warszawa, 00-465, Poland                                                                   | Kom Bioet przy Okręgowej Izbie Lekarskiej Wielkopolskiej Izby Lekarskiej, Nowowiejskiego, Poznań, 61-734, Poland                              |
| Synexus Polska Sp. z o.o. Oddział w Częstochowie, Waly Generała Jozefa Dwernickiego 43/45, Częstochowa, 42202, Poland                                | Kom Bioet przy Okręgowej Izbie Lekarskiej Wielkopolskiej Izby Lekarskiej, Nowowiejskiego, Poznań, 61-734, Poland                              |
| Synexus Polska SCM Sp. z o.o. Gdansku, Beniowskiego 23, Gdansk, 80-382, Poland                                                                       | Kom Bioet przy Okręgowej Izbie Lekarskiej Wielkopolskiej Izby Lekarskiej, Nowowiejskiego, Poznań, 61-734, Poland                              |
| Centrum Medyczne Plejady, ul. Szafrana 5D/U2, U4, U5, Kraków, 30-363, Poland                                                                         | Kom Bioet przy Okręgowej Izbie Lekarskiej Wielkopolskiej Izby Lekarskiej, Nowowiejskiego, Poznań, 61-734, Poland                              |
| Synexus Polska Sp. z o.o., ul. Leszno 12, Warszawa, 01-192, Poland                                                                                   | Kom Bioet przy Okręgowej Izbie Lekarskiej Wielkopolskiej Izby Lekarskiej, Nowowiejskiego, Poznań, 61-734, Poland                              |
| RCMed, ul. Zeromskiego 41A, Sochaczew, 96-500, Poland                                                                                                | Kom Bioet przy Okręgowej Izbie Lekarskiej Wielkopolskiej Izby Lekarskiej, Nowowiejskiego, Poznań, 61-734, Poland                              |
| KO-MED Centra Kliniczne Lublin II, ul. Przerwy - Tetmajera 21, Lublin, 20-362, Poland                                                                | Kom Bioet przy Okręgowej Izbie Lekarskiej Wielkopolskiej Izby Lekarskiej, Nowowiejskiego, Poznań, 61-734, Poland                              |
| <b>Russian Federation</b>                                                                                                                            |                                                                                                                                               |
| Pavlov First Saint Petersburg State Medical University, 6-8, L'va Tolstogo street, Saint Petersburg, 197022, Russian Federation                      | Pavlov First Saint Petersburg State Medical University, 6-8, L'va Tolstogo street, Saint Petersburg, 197022, Russian Federation               |
| Siberian State Medical University, 2, Moscovsky trakt, Tomsk, 634050, Russian Federation                                                             | Siberian State Medical University, 2, Moscovsky trakt, Tomsk, 634050, Russian Federation                                                      |
| Soloviev Hospital, 11 Zagorodny Sad, Yaroslavl, 150003, Russian Federation                                                                           | Clinical Hospital for Emergency Care n.a. N.V. Solovyov, 11, Zagorodny sad, Yaroslavl, 150003, Russian Federation                             |
| Kemerovo Regional Clinical Hospital, 22, Oktyabrsky pr., Kemerovo, 650066, Russian Federation                                                        | Kemerovo Regional Clinical Hospital, 22, Oktyabrsky pr., Kemerovo, 650066, Russian Federation                                                 |
| City Rheumatology Center, Hospital #25, 30, Bolshaya Podyacheskaya, Saint-Petersburg, 190068, Russian Federation                                     | Clinical Rheumatological Hospital # 25, 30, Bolshaya Pod'yacheskay street, Saint-Petersburg, 190068, Russian Federation                       |
| City Clinical Hospital #15 n.a. O.M. Filatov, 23, Veshnyakovskaya ul., Moscow, 111539, Russian Federation                                            | City Clinical Hospital #15 n.a. O.M. Filatov, 23, Veshnyakovskaya ul. Moscow, 111539, Russian Federation                                      |
| State Institute of Public Health, 45-49, Lunacharskogo pr., Saint-Petersburg, 194291, Russian Federation                                             | State Healthcare Institution "Leningrad Regional Clinical Hospital", 45-49 Lunacharskogo street, Saint Petersburg, 194291, Russian Federation |
| Departmental Hospital on Station Smolensk of OJSC Russian Railways, 15, 1st Krasnoflotsky lane, Smolensk, 214025, Russian Federation                 | Departmental Hospital on Station Smolensk of OJSC Russian Railways, 15, 1st Krasnoflotsky lane, Smolensk, 214025, Russian Federation          |
| TSBIH Krasnoyarsk Interdistrict Clin Hospital of Emergency Medical Care, NSKarpovich, 17, Kurchatova street, Krasnoyarsk, 660062, Russian Federation | Clinical Hospital of Emergency Medical Care n.a. N.S. Karpovich 17, Kurchatova street, Krasnoyarsk, 660062, Russian Federation                |

|                                                                                                                                                           |                                                                                                                                                                   |
|-----------------------------------------------------------------------------------------------------------------------------------------------------------|-------------------------------------------------------------------------------------------------------------------------------------------------------------------|
| Family polyclinic Number 4, Stanzionnaya street, 33, Korolev, 141060, Russian Federation                                                                  | Family polyclinic Number 4, Stanzionnaya street, 33, Korolev, 141060, Russian Federation                                                                          |
| State Autonomous Healthcare Institution of Yaroslavl region Hospital # 3, 61,Mayakovskogo street, Yaroslavl, 150007, Russian Federation                   | Local Ethics Committee at State Autonomous Healthcare Institution of Yaroslavl region Hospital # 3, 61,Mayakovskogo street, Yaroslavl, 150007, Russian Federation |
| Yaroslavl Medical Academy, Rheumatology department of Regional Clinical Hospital, Yakovlevskaya street, 7, Yaroslavl, 150062, Russian Federation          | Yaroslavl Regional Clinical Hospital, Cardiovascular department, 7, Yakovlevskaya street, Yaroslavl, 150062, Russian Federation                                   |
| Tver Regional clinical hospital, 105, Peterburgskoe shosse, Tver, 170036, Russian Federation                                                              | Tver Regional clinical hospital, 105, Peterburgskoe shosse, Tver, 170036, Russian Federation                                                                      |
| Centre of Common Medical Practice LLC, 7/1, Krylova street, Novosibirsk, 630091, Russian Federation                                                       | Centre of Common Medical Practice LLC, 7/1, Krylova street, Novosibirsk, 630091, Russian Federation                                                               |
| Joint-Stock Company "Family Medicine Center", 1, Nachdiva Vasilyeva, Ekaterinburg, 620043, Russian Federation                                             | Joint-Stock Company "Family Medicine Center", 1, Nachdiva Vasilveya, Ekaterinburg, 620043, Russian Federation                                                     |
| LLC Practical Medicine, room XII, Birulevskaya street, 1/3, Moscow, 115404, Russian Federation                                                            | LLC Practical Medicine, Room XII, Birulevskaya street 1/3, Moscow, 115404, Russian Federation                                                                     |
| LLC ULTRAMED, 19/12, Krasnykh Zor corner Chkalova street, Omsk, 644024, Russian Federation                                                                | LLC ULTRAMED, 19/12, Krasnykh Zor corner Chkalova street, Omsk, 644024, Russian Federation                                                                        |
| State Budget Healthcare Institution of Yaroslavl Region 'Clinical hospital n.a. N.A. Semashko, 12, Gagarina street, Yaroslavl, 150023, Russian Federation | Clinical Hospital n.a. Semashko N.A. 7, Semashko, Yaroslavl, 150002, Russian Federation                                                                           |
| SIH Saratov City Clinical Hospital # 2 n.a. V.I. Razumovskiy, 141, Chernyshevskogo street, Saratov, 410028, Russian Federation                            | SIH Saratov City Clinical Hospital # 2 n.a. V.I. Razumovskiy, 141, Chernyshevskogo street, Saratov, 410028, Russian Federation                                    |
| Ulyanovsk Regional Clinical Hospital, 7, ul. III-go Internatsionala, Ulyanovsk, 432063, Russian Federation                                                | Ulyanovsk Regional Clinical Hospital, 7, ul. III-go Internatsionala, Ulyanovsk, 432063, Russian Federation                                                        |
| FSBI "Scientific Research Institute of Rheumatology" of MS, Kashirskoye shosse, 34 A, Moscow, 115522, Russian Federation                                  | Rheumatology Research Institute, Kashirskoye shosse, 34 A, Moscow, Russian Federation, 115522                                                                     |
| <b>Serbia</b>                                                                                                                                             |                                                                                                                                                                   |
| Institute of Treatment and Rehabilitation "Niska Banja", Srpskih Junaka 2., Niska Banja, 18205, Serbia                                                    | Ethics Committee of Serbia, Vojvode Stepe 458, Belgrade, 11221, Serbia                                                                                            |
| Institute of Rheumatology, Resavska 69, Belgrade, 11000, Serbia                                                                                           | Ethics Committee of Serbia, Vojvode Stepe 458, Belgrade, 11221, Serbia                                                                                            |
| Institute of Rheumatology, Resavska 69, Belgrade, 11000, Serbia                                                                                           | Ethics Committee of Serbia, Vojvode Stepe 458, Belgrade, 11221, Serbia                                                                                            |
| Institute of Rheumatology, Resavska 69, Belgrade, 11000, Serbia                                                                                           | Ethics Committee of Serbia, Vojvode Stepe 458, Belgrade, 11221, Serbia                                                                                            |
| Institute of Rheumatology, ., Resavska 69, Belgrade, 11000, Serbia                                                                                        | Ethics Committee of Serbia, Vojvode Stepe 458, Belgrade, 11221, Serbia                                                                                            |
| Special Hospital for Rheumatic Diseases, Futoska 68, Novi Sad, 21112, Serbia                                                                              | Ethics Committee of Serbia, Vojvode Stepe 458, Belgrade, 11221, Serbia                                                                                            |
| Clinical Centre Kragujevac, Clinic for Neurology, Zmaj Jovina 30, Kragujevac, 34000, Serbia                                                               | Ethics Committee of Serbia, Vojvode Stepe 458, Belgrade, 11221, Serbia                                                                                            |
| <b>South Africa</b>                                                                                                                                       |                                                                                                                                                                   |
| University of Pretoria Clinical Research Unit, Room 2-54 Pathology Building, Dr Savage Road, Pretoria, 1, South Africa                                    | University of Pretoria, Level 4, Room 4-59, Tswelopele Building opposite BMW building, Pretoria, 0002, South Africa                                               |

|                                                                                                                             |                                                                                                                                                                    |
|-----------------------------------------------------------------------------------------------------------------------------|--------------------------------------------------------------------------------------------------------------------------------------------------------------------|
| latros International, 20 Captain Proctor Street, Bloemfontein, 9301, South Africa,                                          | Pharma Ethics, 123 Amcor Road, 123 Amcor Road,0157, South Africa                                                                                                   |
| Synexus SA Stanza Clinical Research Centre, 2 Shilovane Street Mamelodi East, Pretoria, Gauteng, 122, South Africa          | Pharma Ethics, 123 Amcor Road, 123 Amcor Road,0157, South Africa                                                                                                   |
| Dr Halland & Louw Practice, Hennie Winterbach Avenue, Cape Town, 7500, South Africa                                         | Pharma Ethics, 123 Amcor Road, 123 Amcor Road,0157, South Africa                                                                                                   |
| Dr Halland & Louw Practice, Hennie Winterbach Avenue, Cape Town, 7500, South Africa                                         | Pharma Ethics, 123 Amcor Road, 123 Amcor Road,0157, South Africa                                                                                                   |
| Newtown Clinical Research Centre, Suite 3, Newgate Centre, 104 Jeppe Street, Johannesburg, 2113, South Africa               | Pharma Ethics, 123 Amcor Road, 123 Amcor Road,0157, South Africa                                                                                                   |
| Tiervlei Trial Centre, Mike Pienaar Boulevard, Cape Town, 7530, South Africa                                                | Pharma Ethics, 123 Amcor Road, 123 Amcor Road,0157, South Africa                                                                                                   |
| Naidoo, A, Suite 509, Umhlanga Netcare Medical Centre,, Durban, KwaZulu- Natal, 4319, South Africa                          | Pharma Ethics, 123 Amcor Road, 123 Amcor Road,0157, South Africa                                                                                                   |
| Synexus SA Watermeyer Clinical Research Centre, Ground Floor Synexus Building, Pretoria, Gauteng, 184, South Africa         | Pharma Ethics, 123 Amcor Road, 123 Amcor Road,0157, South Africa                                                                                                   |
| Clinresco Centres (Pty) Ltd, Central Professional Suites, 20 Central Avenue Kempton Park, Gauteng, 1619, South Africa       | Pharma Ethics, 123 Amcor Road, 123 Amcor Road,0157, South Africa                                                                                                   |
| Synexus Helderberg Clinical Research Centre, Suite 7G and H Arun Place, Sir Lowrys Pass Road, Cape Town, 7130, South Africa | Pharma Ethics, 123 Amcor Road, 123 Amcor Road,0157, South Africa                                                                                                   |
| Charlotte Maxeke Johannesburg Academic Hospital, Jubilee Road, Johannesburg, 2193, South Africa                             | Wits Health Consortium, 31 Princess of Wales Terrace, Parktown, Johannesburg, 2193, South Africa                                                                   |
| Dr Spargo Private Practice, Room 201, 2nd Floor, The Park, Park Road, Pinelands, Cape Town, 7405, South Africa              | Pharma Ethics, 123 Amcor Road, 123 Amcor Road,0157, South Africa                                                                                                   |
| Winelands Medical Research Centre, 14A Oewer Park, Stellenbosch, 7600, South Africa                                         | Pharma Ethics, 123 Amcor Road, 123 Amcor Road,0157, South Africa                                                                                                   |
| <b>Spain</b>                                                                                                                |                                                                                                                                                                    |
| Hospital Gregorio Marañón, C/ Dr. Esquerdo, 46, Madrid, 28007, Spain                                                        | Hospital General Universitario, Pabellón de Gobierno, Primera Planta, C/ Dr. Esquerdo 46, Madrid,28007,spain                                                       |
| Hospital Clínico de Santiago, Travesía de Choupana, s/n, Santiago de Compostela. La Coruña., 15706, Spain                   | Hospital Gregorio Marañón, Comité Ético de Investigación Clínica, Fundación Investigación Biomédica, Pabellón de Gobierno, C/ Dr. Esquerdo, 46, Madrid,28007,spain |
| Complejo Hospitalario Universitario A Coruña, Xubias de Arriba, 84, La Coruña, 15006, Spain                                 | Hospital Gregorio Marañón, Comité Ético de Investigación Clínica, Fundación Investigación Biomédica, Pabellón de Gobierno, C/ Dr. Esquerdo, 46, Madrid,28007,spain |
| Hospital Universitario Reina Sofia, Avda Menendez Pidal S/N, Cordoba, 14004, Spain                                          | Hospital Gregorio Marañón, Comité Ético de Investigación Clínica, Fundación Investigación Biomédica, Pabellón de Gobierno, C/ Dr. Esquerdo, 46, Madrid,28007,spain |
| Institut Universitari Dexeus (Instituto Oncológico Dr. Rosell), C/Sabino Arana, 5-19, Barcelona, 8028, Spain                | Hospital Gregorio Marañón, Comité Ético de Investigación Clínica, Fundación Investigación Biomédica, Pabellón de Gobierno, C/ Dr. Esquerdo, 46, Madrid,28007,spain |
| Hospital General Universitario de Elche, Cami, de la Almazara, 11, Elche, 03203, Spain                                      | Hospital Gregorio Marañón, Comité Ético de Investigación Clínica, Fundación Investigación Biomédica, Pabellón de Gobierno, C/ Dr. Esquerdo, 46, Madrid,28007,spain |

|                                                                                                                                                                                    |                                                                                                                                                                                      |
|------------------------------------------------------------------------------------------------------------------------------------------------------------------------------------|--------------------------------------------------------------------------------------------------------------------------------------------------------------------------------------|
| Hospital Cruces, Plaza de Cruces S/N, Baracaldo/Vizcaya, 48903, Spain                                                                                                              | Hospital Gregorio Marañón, Comité Ético de Investigación Clínica, Fundación Investigación Biomédica, Pabellón de Gobierno, C/ Dr. Esquerdo, 46, Madrid,28007,spain                   |
| Hospital Clinico Universitario de Santiago, Servicio de Reumatología, Avenida Choupana, s/n, Santiago de Compostela, 15706, Spain                                                  | Hospital Gregorio Marañón, Comité Ético de Investigación Clínica, Fundación Investigación Biomédica, Pabellón de Gobierno, C/ Dr. Esquerdo, 46, Madrid,28007,spain                   |
| Hospital Clínico Universitario de Valencia, Avda. Blasco Ibañez, 17, Valencia, 46010, Spain                                                                                        | Hospital Gregorio Marañón, Comité Ético de Investigación Clínica, Fundación Investigación Biomédica, Pabellón de Gobierno, C/ Dr. Esquerdo, 46, Madrid,28007,spain                   |
| Hospital Puerta de Hierro, C/ Manuel de Falla, 1, Majadahonda (Madrid), 28222, Spain                                                                                               | Hospital Gregorio Marañón, Comité Ético de Investigación Clínica, Fundación Investigación Biomédica, Pabellón de Gobierno, C/ Dr. Esquerdo, 46, Madrid,28007,spain                   |
| <b>Ukraine</b>                                                                                                                                                                     |                                                                                                                                                                                      |
| Lviv National Medical University, 4 Nekrasova street., Lviv, 79010, Ukraine                                                                                                        | LEC CNE of LRC Lviv Reg Clin Hospital, 7, Chernihivska St., Lviv, 79010, Ukraine                                                                                                     |
| Medical Center of Edelweiss Medics LLC, 8-B, Raisy Okipnoyi St., Kyiv, 2002, Ukraine                                                                                               | LEC LLC Treatment and Diagnostic Center ADONIS Plus, 8-B, Raisy Okipnoyi Street, Kyiv , 02002, Ukraine                                                                               |
| Limited Liability Company Medical Center "Salutem", 46A, Soborna Street., Vinnytsia, 21050, Ukraine                                                                                | LEC Med Center Saliutem LLC, 46A, Soborna Street, Vinnytsia, 21050, Ukraine                                                                                                          |
| Medical Center of Limited Liability Company Medical Clinic Blagomed, 20, Esplanadna street, office 417, Kyiv, 1023, Ukraine                                                        | LEC Mun.Inst.Kyiv Reg.Oncolog. Dispensary, 20, Esplanadna street., office 417, Kyiv, 01023, Ukraine                                                                                  |
| Clinical Treatment & Diagnostic Center of LLC SIMEDGROUP, 91-A, Fedkovycha Street., Ivano-Frankivsk, 76008, Ukraine                                                                |                                                                                                                                                                                      |
| M.D.Strazhesko Institute of Cardiology AMS Ukraine, 5 Narodnogo Opolchenija Street., Kyiv, 3680, Ukraine                                                                           | Central Ethics Commission of the Ministry of Health of Ukraine, 5, Narodnoho Opolchennia St., Kyiv, 03680, Ukraine                                                                   |
| GI L.T.Malaya Therapy Institute of NAMSU, 2A, Prosp. Postysheva Avenue, Kharkiv, 61039, Ukraine                                                                                    | LEC State Institution L.T. Mala Institute of Therapy of Academy of Medical Sciences of Ukraine, 2A, Prosp.Liubovi Maloyi Avenue, Kharkiv, 61039, Ukraine                             |
| Medical Clinical Investigational Center MC LLC Health Clinic, Department of Gastroenterology, Hepatology and Endocrinology, Rm 166, 1 Striletska Street, Vinnytsia, 21009, Ukraine | The Ethics Commission at Medical Center of LLC Health Clinic, prym.166, 1, Striletska Street., Vinnytsia, 21009, Ukraine                                                             |
| National Medical Univ.O.O.Bogomolets, Kyiv Clinical Hospital #3, 26 P. Zaporozhtca street, Kyiv, 2125, Ukraine                                                                     | The Ethics Commission at CNE Kyiv City Clinical Hospital #3 of Executive Body of Kyiv City Council (Kyiv City State Administration), 26, P.Zaporozhtsia Street, Kyiv, 02125, Ukraine |
| City Clinical Hospital #3, 100, Holovna Street, Chernivtsi, 58000, Ukraine                                                                                                         | The Ethics Commission at CNE City Clinical Hospital #3 of Chernivtsi City Council, 100, Holovna Street, Chernivtsi, 58000, Ukraine                                                   |
| GI L.T.Malaya Therapy National Institute of the NAMS of Ukraine, 2-a, Prosp. Liubov Malaya Avenue, Kharkiv, 61039, Ukraine                                                         | The Ethics Commission and Deontology at Government Institution L.T.Malaya Therapy National Institute of NAMS of Ukraine, 2a, prosp. Luibovi Maloi Avenue, Kharkiv, 61039, Ukraine    |
| Medical Center 'Ok!Clinic+' of International Institute of Clinical Trials LLC, 121, Kharkivske shosse street, Kyiv, 2091, Ukraine                                                  | LEC Medical Center LLC Ok!Clinic+, 121, Kharkivske shose Street, Kyiv, 02091, Ukraine                                                                                                |

|                                                                                                                                        |                                                                                                                                                                            |
|----------------------------------------------------------------------------------------------------------------------------------------|----------------------------------------------------------------------------------------------------------------------------------------------------------------------------|
| Ctr of Reconstructive & Restorative Medicine-<br>Odessa National Medical Uni, Valikhovskiy<br>Lane, 2, Odesa, 65000, Ukraine           | LEC Center for Reconstructive and Restorative<br>Medicine (University Hospital) Odessa National<br>MUH U, 8, Tenysta Street, Odesa, 65009,<br>Ukraine                      |
| MC of Sub Prod Unit Med Scient Pract Union<br>Medbud of PJSc HC Kyivmiskbud, 17, Prosp.<br>Lobanovskogo Avenue Kyiv, 3037, Ukraine     | LEC Medical-Practical Association Medbud of<br>PJSC Kyivmiskbud, 17, Prospekt Lobanovskoho<br>Avenue, Kyiv, 03037, Ukraine                                                 |
| Zaporizhzhia City Multidisciplinary Clinical<br>Hospital #9, 1 Shchaslyva St, Zaporizhzhia,<br>69065, Ukraine                          | LEC CNE City Hospital #9 of Zaporizhzhia City<br>Council, Building.1, Shchaslyva Street,<br>Zaporizhzhia, 69065, Ukraine                                                   |
| LLC Treatment-Diagnostic Center ADONIS plus,<br>8b, Raisy Okipnoi, Kyiv, 2002, Ukraine                                                 | LEC LLC Treatment and Diagnostic Center<br>ADONIS Plus 8-B, Raisy Okipnoyi<br>St. Kyiv ,02002, Ukraine                                                                     |
| CI Cherkasy RH of Cherkasy Regional Council,<br>3, Mendelieieva Street , Cherkasy, 18009,<br>Ukraine                                   | LEC LLC Treatment and Diagnostic Center<br>ADONIS Plus, 8-B, Raisy Okipnoyi Street, LLC<br>Treatment-Diagnostic Center ADONIS plus,<br>Kyiv, 02002, Ukraine                |
| LLC Medical Center Concilium Medical,<br>17,Hlybochyt'ska St., Kyiv, 4054, Ukraine                                                     | LEC LLC Medical Centre CONSILIUM<br>MEDICAL, 17, Glybochyt'ska Street, Kyiv,<br>04050, Ukraine                                                                             |
| Odessa Regional Clinical Hospital, 26,<br>Zabolotnogo Street., Odessa, 65025, Ukraine                                                  | LEC Communal Institution Odesa Regional<br>Clinical Hospital, 26, Acad. Zabolotnyi Street,<br>Odesa, 65025, Ukraine                                                        |
| CHI Kharkiv City Clinical Hospital #13, 137,<br>Prosp. Haharina Avenue, Kharkiv, 61124,<br>Ukraine                                     | LEC CNE City Clinical Hospital #13 of Kharkiv<br>City Council, 137, Prosp. Gagarina Avenue<br>Kharkiv, 61124, Ukraine                                                      |
| Military&Medical Clinical Ctr of Lvivof State<br>Border Guard Service-Ukraine, 107,<br>Lychakiv'ska St., Lviv, 79049, Ukraine          | LEC CNE Vinnytsia City Clinical Hospital #1, 96,<br>Khmelnyske shose Street, Vinnytsia, 21029,<br>Ukraine                                                                  |
| CNE Vinnytsya City Clinical Hospital #1,<br>96,Khmelnyske shose St., Vinnytsia, 21029,<br>Ukraine                                      | LEC CNE Vinnytsia City Clinical Hospital #1, 96,<br>Khmelnyske shose Street, Vinnytsia, 21029,<br>Ukraine                                                                  |
| Kyiv regional clinical hospital, 1, Baggoutiv'ska<br>street, Kyiv, 4107, Ukraine                                                       | LEC CNE of Kyiv Regional Council Kyiv<br>Regional Clinical Hospital, 1, Bahhovutiv'ska<br>Street, Kyiv, 04107, Ukraine                                                     |
| CI City Hospital #1, 21A, Chumachenka St.,<br>Zaporizhzhia, 69014, Ukraine                                                             | LEC CI City Hospital #1, 21-A Chumachenko<br>Street, Zaporizhzhia, 69104, Ukraine                                                                                          |
| Medical Center Clinic of Modern Rheumatology,<br>20, Central blvd, Zaporizhzhia, 69005, Ukraine                                        | The Ethics Commission at LLC "Suchasna<br>klinika", prym. 210, 20 Tsentralnyi Blvd.,<br>Zaporizhzhia,69600, Ukraine                                                        |
| Regional Clinical Hosp n a O F Herbachevskiy<br>of Zhytomyr Regional Council, 3 Chervonoho<br>Khresta street, Zhytomyr, 10002, Ukraine | LEC O.F.Herbachevskiy Reg.Clin.Hospital of<br>Zhytomyr RC, 3, Chervonoho Khresta Street,<br>Zhytomyr, 10002, Ukraine                                                       |
| Kyiv City Clinical Hospital #3, 26,<br>P.Zaporozht'sia St., Kyiv, 2125, Ukraine                                                        | LEC Kyiv City Maternity House #6, 26, Petra<br>.Zaporozht'sia Street, Kyiv, 02125, Ukraine                                                                                 |
| SRI of Invalid Rehabilitation -EST Complex,<br>Vinnytsia M.I.Pyrogov NMU MOHU, 104<br>Khmelnyske Shosse, Vinnytsya, 21029, Ukraine     | LEC Scient.&Research Instit.of Invalid<br>Rehabilitation of Vinnytsia M.I.Pyrogov<br>Nat.Med.Univer. 104, Khmelnyske Shose St.,<br>Vinnytsia, 21029, Ukraine               |
| CI of TRC Ternopil UH, 1, Klinichna St.,<br>Ternopil, 46002, Ukraine                                                                   | The Ethics Commission at CNE Ternopil<br>University Hospital of Ternopil Regional Council,<br>1, Klinichna Street, Ternopil, 46002, Ukraine                                |
| M.I. Pyrogov Vinnytsia RCH, Pyrogo'va St., 46,<br>Vinnytsia, 21018, Ukraine                                                            | LEC Vinnytsia M.I.Pyrogov Regional Clinical<br>Hospital, 46, Pyrogo'va Street, Vinnytsia, 21018,<br>Ukraine                                                                |
| CE Volyn Regional Clinical Hospital,<br>21,prosp.Presidenta Hrushevskoho, Lutsk,<br>43005, Ukraine                                     | The Ethics Commission at Communal<br>Enterprise Volyn Regional Clinical Hospital of<br>Volyn Regional Council, 21, prosp.Presidenta<br>Hrushevskoho, Lutsk, 43005, Ukraine |

|                                                                                                                                              |                                                                                                                                                                                             |
|----------------------------------------------------------------------------------------------------------------------------------------------|---------------------------------------------------------------------------------------------------------------------------------------------------------------------------------------------|
| CNE Consultative - Diagnostic Center of Pecherskyi District of Kyiv, 13, Pidvysotskogo Str, Kyiv, 1103, Ukraine                              | The Ethics Commission at CNE Consultative and Diagnostic Center of Pecherskyi District of Kyiv, 13, Pidvysotskoho Street, Kyiv, 01103, Ukraine                                              |
| Multidisciplinary Medical Center of Odesa National Medical University, 9, Pastera St, Odesa, 65026, Ukraine                                  | LEC Multifield Med.Center of Odesa NMU (University Clinic #1), 9, Pastera Street, Odesa, 65026, Ukraine                                                                                     |
| CI Lutsk GCH Volyn Regional Center, 13, Prosp.Vidrozhennia Avenue Lutsk, 43024, Ukraine                                                      | The Ethics Commission at CE Medical Association of Lutsk City Territorial Community, Volyn Regional Center of Cardiovascular Pathology, 13, Prosp.Vidrozhennia Avenue 43024, Lutsk, Ukraine |
| CNE City Clinical Hospital #8 of KCC, 266-g, Saltivske Shose St., Kharkiv, 61176, Ukraine                                                    | The Ethics Commission at Communal Noncommercial Enterprise City Clinical Hospital #8 of Kharkiv City Council, 266 h, Saltivske shose Street, Kharkiv, 61176, Ukraine                        |
| Regional Clinical Hospital, 91 Fedkovycha street, Ivano-Frankivsk, 76008, Ukraine                                                            | LEC CNE Reg Clinical Hospital Ivano-Frank RC, 91, Fedkovycha Street, Ivano-Frankivsk, 76008, Ukraine                                                                                        |
| Railway Transport Kyiv CH#2-Healthcare Ctr Branch of PJSC Ukrainian Railway, 9, Povitroflotsky prosp, Kyiv, 3049, Ukraine                    | LEC Kyiv CI Hosp on Railway Transport #2 of Healthcare Center branch of JSC "Ukrainian Railway", 9, Povitroflotsky prosp, Kyiv, 03049, Ukraine                                              |
| Poltava Regional Clinical Hospital, 23 Shevchenko Street., Poltava, 36011, Ukraine                                                           | LEC Poltava Reg.Clin.Hosp.n.a.M.V.Sklifosovskogo, 23, Shevchenka Street, Poltava, 36011, Ukraine                                                                                            |
| Private Small Enterprise Medical Center Pulse, 34, Timirazieva St., Vinnytsia, 21001, Ukraine                                                | LEC Private Small Enterprise Med. Center Pulse, 34, Timirazieva Street, Vinnytsia, 21001, Ukraine                                                                                           |
| <b>United Kingdom</b>                                                                                                                        |                                                                                                                                                                                             |
| MeDiNova East London Clinical Studies Centre, Blackburn House, 22 - 26 Eastern Road, Romford, Essex, RM1 3PJ, United Kingdom                 | South Central-Berkshire B Research Ethics Committee, Whitefriars Level 3, Block B Lewins Mead Bristol BS1 2NT.                                                                              |
| MeDiNova Ltd, North London Clinical Studies Centre, Mount Vernon Hospital, Rickmansworth Road, Northwood, Middlesex, HA6 2RN, United Kingdom | South Central-Berkshire B Research Ethics Committee, Whitefriars Level 3, Block B Lewins Mead Bristol BS1 2NT.                                                                              |
| Medinova Warwickshire Quality Research Site, 42 Station Rd, Kenilworth, Warwickshire, CV8 1JD, United Kingdom                                | South Central-Berkshire B Research Ethics Committee, Whitefriars Level 3, Block B Lewins Mead Bristol BS1 2NT.                                                                              |
| <b>United States of America</b>                                                                                                              |                                                                                                                                                                                             |
| Well Pharma Medical Research Corporation, Suite 100, 7000 Southwest 62 Avenue, South Miami, Florida, 33143, United States                    | Copernicus Group, Suite 200, 5000 Centregreen Way, Cary, 27513, North Carolina, United States.                                                                                              |
| Arizona Arthritis and Rheumatology Research, 9520 W. Palm Ln. Suite 220, Phoenix, Arizona, 85037, United States.                             | Copernicus Group, Suite 200, 5000 Centregreen Way, Cary, North Carolina, 27513, United States.                                                                                              |
| Oklahoma Medical Research Foundation, 630 24th Avenue, SW, Norman, Oklahoma, 73069, United States                                            | Oklahoma Medical Research Foundation, MS22, 825 N.E. 13th St, Oklahoma City, 73104, Oklahoma, United States                                                                                 |
| Omega Research MetroWest, LLC, Suite 400, 1743 Park Center Drive, Orlando, Florida, 32835, United States.                                    | Copernicus Group, Suite 200, 5000 Centregreen Way, Cary, North Carolina, 27513, United States.                                                                                              |
| Precision Comprehensive Clinical Research Solutions, 5009 Heritage Avenue, Colleyville, Texas, 76034, United States.                         | Copernicus Group, Suite 200, 5000 Centregreen Way, Cary, North Carolina, 27513, United States.                                                                                              |
| Arizona Arthritis and Rheumatology Research, 4550 E Bell Rd, Phoenix, Arizona, 85032, United States.                                         | Copernicus Group, Suite 200, 5000 Centregreen Way, Cary, North Carolina, 27513, United States.                                                                                              |

|                                                                                                                              |                                                                                                                                                     |
|------------------------------------------------------------------------------------------------------------------------------|-----------------------------------------------------------------------------------------------------------------------------------------------------|
| Advanced Rheumatology of Houston, Suite 120, 10857 Kuykendahl Road, The Woodlands, Texas, 77382, United States.              | Copernicus Group, Suite 200, 5000 Centregreen Way, Cary, North Carolina, 27513, United States.                                                      |
| University of South Florida - Parent, MDC-81, 13330 USF Laurel Drive, Tampa, Florida, 33612, United States                   | Western Institutional Review Board-Copernicus Group incorporated, Suite 120, 1019 39th Avenue. S.E, Puyallup, 98374-2115, Washington, United States |
| Northside Hospital, 1000 Johnson Ferry Rd NE, Atlanta, Georgia, 30342-1606, United States                                    | Western Institutional Review Board-Copernicus Group incorporated, Suite 120, 1019 39th Avenue. S.E, Puyallup, 98374-2115, Washington, United States |
| Pinnacle Research Group LLC, Suite 200, 409 East 10th Street, Anniston, Alabama, 36207, United States                        | Copernicus Group, Suite 200, 5000 Centregreen Way, Cary, 27513, North Carolina, United States                                                       |
| Physicians Research Institute, Suite 120, 3901 Pine Lake Rd, Lincoln, Nebraska, 68516, United States.                        | Copernicus Group, Suite 200, 5000 Centregreen Way, Cary, North Carolina, 27513, United States.                                                      |
| Pioneer Research Solutions, 21212 Northwest Fwy #375, Cypress, Texas, 77429, United States                                   | Copernicus Group, Suite 200, 5000 Centregreen Way, Cary, 27513, North Carolina, United States                                                       |
| Trinity Medical Group Health Center - Medical Arts, 400 East Burdick Expressway, Minot, North Dakota, 58701, United States   | Trinity Hospitals IRB, One Burdick Expressway West, Minot, 58701, North Dakota, United States                                                       |
| Accurate Clinical Management - Partner, Suite 200, 11920 Astoria Boulevard, Houston, Texas, 77089, United States.            | Copernicus Group, Suite 200, 5000 Centregreen Way, Cary, North Carolina, 27513, United States.                                                      |
| Assuta Medical Group, Suite 1407, 12922 Victory Boulevard, North Hollywood, California, 91606, United States.                | Copernicus Group, Suite 200, 5000 Centregreen Way, Cary, North Carolina, 27513, United States.                                                      |
| Lakes Research LLC, 5801 NW 151 St., Miami Lakes, Florida, 33014, United States                                              | Copernicus Group, Suite 200, 5000 Centregreen Way, Cary, 27513, North Carolina, United States                                                       |
| Arthritis & Osteoporosis Clinic, Suite 101, 611 W Hwy 6, Waco, 76710, Texas, United States                                   | Copernicus Group, Suite 200, 5000 Centregreen Way, Cary, 27513, North Carolina, United States                                                       |
| Arthritis Clinic Of Central Texas, Building 2, Suite 2203, 1340 Wonder World Drive, San Marcos, Texas, 78666, United States. | Copernicus Group, Suite 200, 5000 Centregreen Way, Cary, North Carolina, 27513, United States.                                                      |
| La Salud Research Clinic, Suite 203, 8415 Southwest 24th Street, Miami, Florida, 33155, United States                        | Copernicus Group, Suite 200, 5000 Centregreen Way, Cary, 27513, North Carolina, United States                                                       |
| Piedmont Arthritis Clinic, P.A., 3 St. Francis Drive, Greenville, South Carolina, 29601, United States                       | Copernicus Group IRB, Suite 200, 5000 Centregreen Way, Cary, North Carolina, 27513 United States                                                    |
| Arthritis Consultants, Suite 240, 522 N. New Ballas, St. Louis, Missouri, 63141, United States                               | Copernicus Group IRB, Suite 200, 5000 Centregreen Way, Cary, North Carolina, 27513 United States                                                    |
| Great Lakes Clinical Trials, 5149 North Ashland Avenue, Chicago, Illinois, 60640, United States                              | Copernicus Group IRB, Suite 200, 5000 Centregreen Way, Cary, North Carolina, 27513 United States                                                    |
| Javed Rheumatology Associates INC, Suite 103, 550 Stanton Christiana Road, Newark, Delaware, 19713, United States            | Copernicus Group IRB, Suite 200, 5000 Centregreen Way, Cary, North Carolina, 27513 United States                                                    |
| Bay Area Arthritis and Osteoporosis, 1355 Providence Road, Brandon, Florida, 33511, United States                            | Copernicus Group IRB, Suite 200, 5000 Centregreen Way, Cary, North Carolina, 27513 United States                                                    |
| University of Florida, Jacksonville, Suite 220, 4555 Emerson Street, Jacksonville, Florida, 32207, United States             | WIRB, Suite 120, 1019 39th Avenue SE, Puyallup, Washington, 98374, United States                                                                    |



|                                                                                                                                   |                                                                                                                                                      |
|-----------------------------------------------------------------------------------------------------------------------------------|------------------------------------------------------------------------------------------------------------------------------------------------------|
| Arizona Arthritis & Rheumatology, #170, 4550 E. Bell Rd., Phoenix, Arizona, 85032, United States                                  | Copernicus Group IRB, Suite 200, 5000 Centregreen Way, Cary, North Carolina, 27513 United States                                                     |
| Medvin Clinical Research, 6673 Foothill Blvd, Tujunga, California, 91042, United States                                           | Copernicus Group, Suite 200, 5000 Centregreen Way, Cary, North Carolina, 27513, United States                                                        |
| Inland Rheumatology Clinical Trials, Inc., 1238 East Arrow Highway, Upland, California, 91786, United States                      | WIRB, Suite 120, 1019 39th Avenue SE, Puyallup, Washington, 98374, United States                                                                     |
| Chicago Clinical Research Institute, 611 West Roosevelt Road, Chicago, Illinois, 60607, United States                             | Copernicus Group IRB, Suite 200, 5000 Centregreen Way, Cary, North Carolina, 27513 United States                                                     |
| Arizona Arthritis and Rheumatology Research, 9520 W. Palm Ln. Suite 220, Phoenix, Arizona, 85037, United States                   | Copernicus Group IRB, Suite 200, 5000 Centregreen Way, Cary, North Carolina, 27513 United States                                                     |
| Cincinnati Rheumatic Disease Study Group, Inc. (CRDSG), Suite 26, 10495 Montgomery Road, Cincinnati, Ohio, 45242, United States   | Copernicus Group IRB, Suite 200, 5000 Centregreen Way, Cary, North Carolina, 27513 United States                                                     |
| Piedmont Healthcare, Inc, Suite 500, 1800 Howell Mill Road, Atlanta, Georgia, 30318, United States                                | Western Institutional Review Board-Copernicus Group incorporated, Suite 120, 1019 39th Avenue. S.E, Puyallup, 98374-2115, Washington, United States. |
| The Center for Rheumatology and Bone Research, Suite 306, 2730 University Blvd, West, Wheaton, Maryland, 20902, United States     | Copernicus Group, Suite 200, 5000 Centregreen Way, Cary, 27513, North Carolina, United States                                                        |
| BayCare Medical Group Inc., 4612 N Habana Avenue First Floor, Tampa, Florida, 33614, United States                                | Copernicus Group, Suite 200, 5000 Centregreen Way, Cary, 27513, North Carolina, United States                                                        |
| Medvin Clinical Research, 500 W. San Bernardino Rd., Suite A, Covina, California, 91722, United States                            | Copernicus Group, Suite 200, 5000 Centregreen Way, Cary, 27513, North Carolina, United States                                                        |
| Accurate Clinical Management, LLC., 2222 Greenhouse Road, Houston, Texas, 77084, United States.                                   | Copernicus Group, Suite 200, 5000 Centregreen Way, Cary, North Carolina, 27513, United States.                                                       |
| Arthritis & Osteoporosis Clinic of Brazos Valley, Suite 204, 1721 Birmingham Drive, College Station, Texas, 77845, United States. | Copernicus Group, Suite 200, 5000 Centregreen Way, Cary, North Carolina, 27513, United States.                                                       |
| Rheumatology Center of San Diego, PC, Suite 220, 16516 Bernardo Center Dr., San Diego, California, 92128, United States.          | Copernicus Group, Suite 200, 5000 Centregreen Way, Cary, North Carolina, 27513, United States.                                                       |
| Innovation Medical Research Center, Inc, 9299 SW 152nd Street, Palmetto Bay, Florida, 33157, United States.                       | Copernicus Group, Suite 200, 5000 Centregreen Way, Cary, North Carolina, 27513, United States.                                                       |
| Sun Valley Arthritis Center, LTD, 6818 W. Thunderbird Rd, Peoria, Arizona, 85381, United States                                   | Copernicus Group, Suite 200, 5000 Centregreen Way, Cary, 27513, North Carolina, United States                                                        |
| Lynn Health Science Institute, Suite 800, 3555 NW 58th Street, Oklahoma City, Oklahoma, 73112, United States                      | Copernicus Group IRB, Suite 200, 5000 Centregreen Way, Cary, North Carolina, 27513, United States                                                    |
| Sweet Hope Research Specialty, Inc., 14160 Palmetto Frontage Rd, Miami Lakes, Florida, 33016, United States                       | Copernicus Group, Suite 200, 5000 Centregreen Way, Cary, 27513, North Carolina, United States                                                        |
| Centre for Rheumatology, Immunology and Arthritis, 2900 West Cypress Creek Road, Fort Lauderdale, Florida, 33309, United States   | Copernicus Group, Suite 200, 5000 Centregreen Way, Cary, 27513, North Carolina, United States                                                        |
| Florida Medical Clinic, 38135 Market Square, Zephyrhills, Florida, 33540, United States                                           | Copernicus Group, Suite 200, 5000 Centregreen Way, Cary, 27513, North Carolina, United States                                                        |

|                                                                                                                                             |                                                                                                                                                                   |
|---------------------------------------------------------------------------------------------------------------------------------------------|-------------------------------------------------------------------------------------------------------------------------------------------------------------------|
| Advent Health Medical Group, Suite 321, 13601 Bruce B Downs Boulevard, Tampa, Florida, 33613, United States                                 | Copernicus Group, Suite 200, 5000 Centregreen Way, Cary, 27513, North Carolina, United States                                                                     |
| Medvin Clinical Research, 12456 Washington Boulevard, Whittier, California, 90602, United States.                                           | Copernicus Group, Suite 200, 5000 Centregreen Way, Cary, North Carolina, 27513, United States.                                                                    |
| Future Care Solution, LLC, 10101 SW 40th Street, Miami, Florida, 33165, United States.                                                      | Copernicus Group, Suite 200, 5000 Centregreen Way, Cary, North Carolina, 27513, United States.                                                                    |
| International Medical Research, Suite 110, 1893 N. Clyde Morris Blvd., Daytona Beach, Florida, 32117, United States.                        | Copernicus Group, Suite 200, 5000 Centregreen Way, Cary, North Carolina, 27513, United States.                                                                    |
| Millennium Physicians Association, LLP, 17323 Red Oak Drive, Houston, Texas, 77090, United States.                                          | Copernicus Group, Suite 200, 5000 Centregreen Way, Cary, North Carolina, 27513, United States.                                                                    |
| Better Health Clinical Research, Suite 100, 1665 Highway 34 East, Newnan, Georgia, 30265, United States.                                    | Copernicus Group, Suite 200, 5000 Centregreen Way, Cary, North Carolina, 27513, United States.                                                                    |
| West Texas Clinical Research, Suite 2C, 3809 22nd Street, Lubbock, Texas, 79410, United States.                                             | Copernicus Group, Suite 200, 5000 Centregreen Way, Cary, North Carolina, 27513, United States.                                                                    |
| Mansfield Health Center, 200 Copeland Dr., Mansfield, Massachusetts, 2048, United States.                                                   | Copernicus Group, Suite 200, 5000 Centregreen Way, Cary, North Carolina, 27513, United States.                                                                    |
| Brigham and Women's Hospital, 75 Francies Street, Boston, Massachusetts, 02115, United States.                                              | None                                                                                                                                                              |
| STAT Research, Suite 100B, 600 Aviator Court, Vandalia, Ohio, 45377, United States                                                          | Copernicus Group, Suite 200, 5000 Centregreen Way, Cary, 27513, North Carolina, United States                                                                     |
| <b>ContrASt 2</b>                                                                                                                           |                                                                                                                                                                   |
| <b>Argentina</b>                                                                                                                            |                                                                                                                                                                   |
| Sanatorio Allende S.A., Av. Hipólito Yrigoyen 384, Córdoba, Córdoba, X5000JHQ, Argentina                                                    | Administración Nacional de Medicamentos, Alimentos y Tecnología Médica, Avenida de Mayo 869, Ciudad Autónoma de Buenos Aires, Buenos Aires, C1084AAD, Argentina   |
| Clinica Adventista Belgrano, Estomba 1710, Ciudad Autonoma Buenos Aires, Buenos Aires, C1430EGF, Argentina                                  | Comite de Etica en Investigacion Clinica, Buenos Aires, Larrea 1381 3A, CABA, C1117ABK, Argentina                                                                 |
| Expertia S.A- Mautalen Salud e Investigación, Azcuenaga 1860, Ciudad Autonoma Buenos Aires, Buenos Aires, C1128AAE, Argentina               | Administración Nacional de Medicamentos, Alimentos y Tecnología Médica, Avenida de Mayo 869, Ciudad Autónoma de Buenos Aires, Buenos Aires, C1084AAD, Argentina   |
| Centro de Investigaciones Reumatologicas, Las Piedras 108, San Miguel de Tucumán, Tucumán, T4000BRD, Argentina                              | - Administración Nacional de Medicamentos, Alimentos y Tecnología Médica, Avenida de Mayo 869, Ciudad Autónoma de Buenos Aires, Buenos Aires, C1084AAD, Argentina |
| Centro de Investigaciones Reumatologicas y Osteologicas, J. E. Uriburu 1170, Ciudad Autonoma de Buenos Aires, Buenos Aires, 1111, Argentina | Comité de Ética en Investigación Clínica, Parana 755, 6 ° A y B, Ciudad Autonoma de Buenos Aires, Buenos Aires, C1017AAO, Argentina                               |
| Centro Polivalente de Asistencia e Inv. Clinica CER, Laprida 532 Este, San Juan, San Juan, 5400, Argentina                                  | CEIC Dr. Stambouljian, Parana 755 6to A y B, Ciudad Autónoma de Buenos Aires, Buenos Aires, C1017AAP, Argentina                                                   |
| Centro Reumatologico strusberg, Emilio Olmos 247 1° piso, Cordoba, Córdoba, X5000EDC, Argentina                                             | Centro Reumatologico strusberg, Emilio Olmos 247 1° piso, Cordoba, Córdoba, X5000EDC, Argentina                                                                   |

|                                                                                                                                                            |                                                                                                                                             |
|------------------------------------------------------------------------------------------------------------------------------------------------------------|---------------------------------------------------------------------------------------------------------------------------------------------|
| Centro Medico Privado de Reumatologia, Lavalle 506, San Miguel de Tucuman, Tucumán, T4000AXL, Argentina                                                    | Comite de Etica Dr Carlos Barclay, Larrea 1381 3° Piso A, CABA, Ciudad Autonoma Buenos Aires, C1117ABK, Argentina                           |
| Instituto Medico DAMIC, Av Colon 2057, Cordoba, Córdoba, X5003DCE, Argentina                                                                               | Comite Independiente de etica Fundacion Rusculleda, Avenida Colon 2057, Cordoba, Córdoba, X5003DCE, Argentina                               |
| Organizacion Medica de Investigacion (OMI), Uruguay 725 PB, Ciudad Autonoma Buenos Aires, C1015ABO, Argentina                                              | Comite de Etica Dr Carlos Barclay, Larrea 1381 3° Piso A, CABA, Ciudad Autonoma Buenos Aires, C1117ABK,Argentina                            |
| Instituto de Investigaciones Clínicas Quilmes, Sarmiento 315, Quilmes, Buenos Aires, B1878GEG, Argentina                                                   | Administración Nacional de Medicamentos, Alimentos y Tecnología Médica, Ciudad Autónoma de Buenos Aires, Buenos Aires, C1084AAD, Argentina  |
| <b>Australia</b>                                                                                                                                           |                                                                                                                                             |
| Box Hill Hospital, 5 Arnold Street, Box Hill, Victoria, 3128, Australia                                                                                    | Eastern Health Research and Ethics Committee, 5 Arnold Street, Level 3, Box Hill, Victoria, 3128, Australia                                 |
| Heidelberg Repatriation Hospital, 300 Waterdale Road, Heidelberg, Victoria, 3081, Australia                                                                | Austin Health Human Research Ethics Committee, 145 Studley Road, Heidelberg, Victoria, 3084, Australia                                      |
| Griffith University, Clinical Trial Unit (Griffith Health), G40, Level 4, Gold Coast Campus, Griffith University, Gold Coast, Queensland, 4222, Australia  | Bellberry Limited, 129 Glen Osmond Rd, Eastwood, South Australia, 5063, Australia                                                           |
| Rheumatology Research Unit, 9-10 Maroochy Waters Shopping Centre, Denna Street, Maroochydore, Queensland, 4558, Australia                                  | Bellberry Limited, 129 Glen Osmond Rd, Eastwood, South Australia, 5063, Australia                                                           |
| Queen Elizabeth Hospital, 28 Woodville Road, Woodville, South Australia, 5011, Australia                                                                   | Central Adelaide Local Health Network Human Research Ethics Committee, North Terrace, Adelaide, South Australia, 5000, Australia            |
| Southern Clinical Research Pty Ltd, 4 Warneford Street, Hobart, Tasmania, 7000, Australia                                                                  | Bellberry Limited, 129 Glen Osmond Rd, Eastwood, South Australia, 5063, Australia                                                           |
| Genesis Research Services, 220 Denison Street, Broadmeadow, New South Wales, 2292, Australia                                                               | Bellberry Human Research Ethics Committees, 229 Greenhill Road, Dulwich, South Australia, 5065, Australia                                   |
| Westmead Hospital, Corner of Hawkesbury and Darcy Roads, Westmead, New South Wales, 2145, Australia                                                        | Central Adelaide Local Health Network Human Research Ethics Committee, North Terrace, Adelaide, South Australia, 5000, Australia            |
| <b>Brazil</b>                                                                                                                                              |                                                                                                                                             |
| Hospital Santa Marcelina, Rua Santa Marcelina 177, São Paulo, São Paulo, 08270-070, Brazil                                                                 | Hospital santa marcelina, Rua Santa Marcelina 177, Sao Paulo, São Paulo, 08270-070, Brazil                                                  |
| Fundação Faculdade Regional de Medicina de São José do Rio Preto, Avenida Brigadeiro Faria Lima, 5544, Sao Jose do Rio Preto, São Paulo, 15090-000, Brazil | CEP da Faculdade de Medicina de São José do Rio Preto, Av. Brigadeiro Faria Lima, 5416, São José do Rio Preto, Sao Paulo, 15090-000, Brazil |
| <b>Bulgaria</b>                                                                                                                                            |                                                                                                                                             |
| MHAT "Sveta Petka" AD, Tsar Simeon Veliki str.119, Vidin, 3700, Bulgaria                                                                                   | Ethics Committee for Multicentre Trials, 8, Damyán Gruev, Sofia, 1303, Bulgaria                                                             |
| Diagnostic and Consulting Center Aleksandrovska EOOD, 1 Sv. Georgi Sofiyski Street, Sofia, 1431, Bulgaria                                                  |                                                                                                                                             |
| UMHAT Kanev AD, 2, Nezavisimost Str., Ruse, 7002, Bulgaria                                                                                                 | Republic of Bulgaria Ministry of Health EC for Clinical Trials, 8 Damyán Gruev Str, Sofia, 1303, Bulgaria                                   |
| MC Blagoevgrad-2009, 60 Slavyanska Str., Blagoevgrad, 2700, Bulgaria                                                                                       | Ethics Committee for Multicentre Trials, 8, Damyán Gruev, Sofia, 1303, Bulgaria                                                             |

|                                                                                                                                                |                                                                                                                         |
|------------------------------------------------------------------------------------------------------------------------------------------------|-------------------------------------------------------------------------------------------------------------------------|
| Military Medical Academy, Clinic of Cardiology and Rheumatology, 3, Georgi Sofiiski Str., Sofia, 1606, Bulgaria                                |                                                                                                                         |
| UMHAT PULMED OOD, 1A, Perushtica Str, plovdiv, 4000, Bulgaria                                                                                  | Ethics Committee for Multicenter Trials, 8 Damyan Gruev Str, Sofia, 1303, Bulgaria                                      |
| Medical Center "Excelsior", OOD, 4, Golo Bardo Str., Sofia, 1407, Bulgaria                                                                     |                                                                                                                         |
| UMHAT Sv. Iv.Rilski, 15, Akademik Ivan Geshov Blvd, Sofia, 1612, Bulgaria                                                                      | Ethics Committee for Multicenter Trials, 8 Damyan Gruev Str., Sofia, 1303, Bulgaria                                     |
| UMHAT "Pulmed" OOD, 1A, Perushtitsa Str, Plovdiv, 4000, Bulgaria                                                                               | Ethics Committee for Multicenter Trials, 8 Damyan Gruev Str, Sofia, 1303, Bulgaria                                      |
| Medizinski Zentar-1-Sevlievo EOOD, 147, Stefan Peshev Str., Sevlievo, 5400, Bulgaria                                                           |                                                                                                                         |
| MHAT "Eurohospital" - Plovdiv, OOD, 79, Komatevsko Shose Blvd., Plovdiv, 4002, Bulgaria                                                        | Ethics Committee for Multicenter Trials, 8 Damyan Gruev Str, Sofia, 1303, Bulgaria                                      |
| UMHAT "Sv. Ivan Rilski" EAD, 15 "Akad. Ivan Geshov" Blvd, Sofia, 1431, Bulgaria                                                                | Republic of Bulgaria Ministry of health EC for Clinical Trials, 8 Damyan Gruev Str, Sofia, 1303, Bulgaria               |
| Medizinski Zentar-1-Sevlievo EOOD, 147, Stefan Peshev Str., Sevlievo, 5400, Bulgaria                                                           |                                                                                                                         |
| Synexus Affiliate - Stara Zagora - Orpheus (AS), Orpheus 4 Str, Stara Zagora, 6000, Bulgaria                                                   | Republic of Bulgaria Ministry of health EC for Clinical Trials, 8 Damyan Gruev Street, Sofia, 1303, Bulgaria            |
| Medical Center "Teodora", EOOD, 101, Mutkurova Str., Ruse, 7000, Bulgaria                                                                      | Republic Of Bulgaria Bulgarian Drug Agency, 8 Damyan Gruev Street, Sofia, 1303, Bulgaria                                |
| MHAT "Trimontium", OOD, 126, Tsar Boris III Obedinitel Blvd., Plovdiv, 4000, Bulgaria                                                          | Republic of Bulgaria Ministry of health EC for Clinical Trials, 8 Damyan Gruev Str, Sofia, 1303, Bulgaria               |
| Medical Center Synexus Sofia EOOD, 20A Andrey Saharov Blvd/ Madost 1, Sofia, 1784, Bulgaria                                                    | Republic of Bulgaria Ministry of health EC for Clinical Trials, 8 Damyan Gruev Str, Sofia, 1303, Bulgaria               |
| <b>China</b>                                                                                                                                   |                                                                                                                         |
| The Third Hospital of Hebei Medical University, No. 139 Ziqiang Road, Shijiazhuang, Hebei, 050051, China                                       |                                                                                                                         |
| Jilin Province People's Hospital, No.1183 Gongnong Street, Changchun, Jilin, 130021, China                                                     | Ethics Committee OF Jilin Province People's Hospital, No.1183 Gongnong Street, Changchun, Jilin, 130021, China          |
| Tongji Hosp of Tongji Medical Col Of Huazhong Univ Of Science & Technology, Rheumatology, No. 1095 Jiefang Avenue, Wuhan, Hubei, 430030, China | The Ethics Community of Huazhong University of Science & Technology, No. 13 Hangkong Rd, Wuhan, 430030, China           |
| 1st Affiliated Hospital, Xian Jiaotong University, No.277, Yanta West Road, Xian, 710061, China                                                |                                                                                                                         |
| Taizhou People's Hospital, No 210 Yingchun Rd Hailing District, Taizhou, Zhejiang, 225300, China                                               | Taizhou People's Hospital, No.366, Taihu Road, Taizhou, Jiangsu, 225300, China                                          |
| 1st Affiliated Hospital of Jilin University, No.1 Xinmin Street., Changchun, Jilin, 130021, China                                              | The First Hospital of Jilin University, No. 71, Xin Min Da Street, Changchun, Jilin, 130021, China                      |
| Yanbian University Hospital, No.1327 Juzi Street, Yanji, 133000, China                                                                         | Ethics committee of Yanbian University Hospital, No.1327 Juzi Street, Yanji, 133000, China                              |
| The Affiliated Hospital of Inner Mongolia Medical University, No.1 North Tongdao Road, Huhehaote, Hohhot, 10050, China                         | The Affiliated Hospital of Inner Mongolia Medical University, No.1 North Tongdao Road, Huhehaote, Hohhot, 010050, China |
| ZhuZhou Central Hospital, No.116 South Changjiang Road, ZhuZhou, Hunan, 412007, China                                                          |                                                                                                                         |

|                                                                                                                                               |                                                                                                                                                                |
|-----------------------------------------------------------------------------------------------------------------------------------------------|----------------------------------------------------------------------------------------------------------------------------------------------------------------|
| Xuzhou Central Hospital, No.199 South Jiefang Road, Xuzhou, Jiangsu, 221009, China                                                            | EC of Xuzhou Central Hospital, No.199 South Jiefang Road, Xuzhou, Jiangsu, 221009, China                                                                       |
| Jiangxi Jiujiang 1st People's Hospital, No48 South Taling Rd, Jiujiang, Jiangxi, 332000, China                                                |                                                                                                                                                                |
| West China Hospital, Sichuan University, No.37 Guoxue Lane, Wuhou District, Chengdu, Sichuan, 610041, China                                   | West China Hospital, Sichuan University, No. 37 Guo Xue Xiang, Chengdu, 610041, China                                                                          |
| Yancheng First People's Hospital, No. 66 South Renmin Road, Yancheng, Jiangsu, 224001, China                                                  | Yancheng Municipal First People's Hospital, 2/F Science Education building, 166 Yu Long Road, Yancheng, Jiangsu, 224005, China                                 |
| The Affiliated Hospital of Guilin Medical University, No.15 Lequn Road, Guilin, Guangxi, 541001, China                                        | The Affiliated Hospital of Guilin Medical University, No.15 Lequn Road, Guilin, Guangxi, 541001, China                                                         |
| The Third People's Hospital of Huzhou, No.2088 East of Tiaoxi Road, Huzhou, Zhejiang, 313000, China                                           | The Third People's Hospital of Huzhou, No.2088 East of Tiaoxi Road, Huzhou, Zhejiang, 313000, China                                                            |
| The Third Affiliated Hospital of Southern Medical University, No. 183, Zhongshan Avenue, Tianhe District, Guangzhou, Guangdong, 510500, China |                                                                                                                                                                |
| The Affiliated Drum Tower Hospital of Nanjing University, No 321 Zhongshan Road, Nanjing, 210008, China                                       | The Affiliated Drum Tower Hospital of Nanjing University, No 321,Zhongshan Road,Gulou District, Nanjing, Jiangsu, 210008, China                                |
| Peking University Shougang Hospital, No.9 Jinyuanzhuang Road, Shijingshan District, Beijing, 100144, China                                    | Ethics Committee of Peking University Shougang Hospital, 9 Jinyuanzhuang Road, Shijingshan District, Beijing, Beijing, 100144, China                           |
| Zhongda hospital southeast university, No.87 Dingjiaqiao Street, Nanjing, Jiangsu, 210009, China                                              | Ethics Committee of Zhong Da Hospital, Southeast University, No.87 Dingjiaqiao Street, Nanjing, Jiangsu, 210009, China                                         |
| Xinhua Hospital of Zhejiang Province, 318 Chaowang Rd, Gongshu Qu, Hangzhou, 310005, China                                                    | EC of 2nd Aff. Hospital of Zhejiang University of Trad. Chinese Medicine, No.138 Chaowang road,Gongshu district, Hangzhou, 310005, China                       |
| The First Affiliated Hospital of Baotou Medical School, No.41 Linyin Road of Kun Du Lun District, Baotou, Inner Mongolia, 014010, China       | The First Affiliated Hospital of Baotou Medical School, No.41 Linyin Road of Kun Du Lun District, Baotou, Inner Mongolia, 014010, China                        |
| Chengdu Wuhou District Center for Disease Control and Prevention, No. 6, Guangfuqiao Street, Wuhou District, Chengdu, Sichuan, 610000, China  | Medical Ethic Committee of Jiangxi Provincial People's Hospital, No.92 Aiguo Road, Nanchang, Nanchang, 330006, China                                           |
| Subei People Hospital, No. 98 West Nantong Road, Yangzhou, 225000, China                                                                      | Subei People Hospital, No. 98 West Nantong Road, Yangzhou, 225000, China                                                                                       |
| Tianjin Medical University General Hospital, 154#, Anshan Road, Tianjin, 300052, China                                                        | Tianjin Medical University General Hospital, 154#, Anshan Road, Tianjin, 300052, China                                                                         |
| The First People's Hospital of Changzhou, No. 185 Juqian Street., Changzhou, 213003, China                                                    | The First People's Hospital of Changzhou, No. 185 Juqian Street., Changzhou, 213003, China                                                                     |
| The First Affiliated Hospital of Bengbu Medical College, No.287 Changhuai Road, Bengbu, Anhui, 233004, China                                  | The First Affiliated Hospital of Bengbu Medical College, No.287 Changhuai Road, Bengbu, Anhui, 233004, China                                                   |
| Shanghai Huashan Hospital, 12 Wulumuqi Middle Road, Shanghai, 200040, China                                                                   |                                                                                                                                                                |
| The First Affiliated Hospital of Sun Yat-sen University, No. 58 Zhongshan Second Road, Guangzhou, 510080, China                               | Ethics Committee of 1st Affiliated Hospital, Sun Yat-Sen University, Room 110, Longzhu office building, No. 5 Zhushigang Second road, Guangzhou, 510080, China |

|                                                                                                                                                                  |                                                                                                                                                         |
|------------------------------------------------------------------------------------------------------------------------------------------------------------------|---------------------------------------------------------------------------------------------------------------------------------------------------------|
| Peking Union Medical College Hospital, No.1 Shuaifuyuan Dongcheng District, Beijing, 100005, China                                                               | Peking Union Medical College Hospital, #41 Damucang Hutong Xicheng, Beijing, 100032, China                                                              |
| The Third Xiangya Hospital of Central South University, No 138 Tongzipo Road, Yuelu District, Changsha, Hunan, 410013, China                                     | Ethics Committee of The Third Xiangya Hospital of Central South University, No. 138 Tongzipo Road, Hexi yuelu district, Changsha, Hu'nan, 410013, China |
| Jinzhou Central Hospital, No.51, Shanghai Road, Guta district, Jinzhou, Liaoning, 121000, China                                                                  | Jinzhou Central Hospital, No.51, Shanghai Road, Guta district, Jinzhou, Liaoning, 121000, China                                                         |
| <b>Colombia</b>                                                                                                                                                  |                                                                                                                                                         |
| CIRCARIBE SAS, Calle 71 No 41-46, Barranquilla, 80002, Colombia                                                                                                  | Res. Ethics Comm. Health Sciences Department of the Universidad del Norte, Km. 5 vía Puerto Colombia, Barranquilla, 1569 – 51820, Colombia              |
| Centro de Investigacion Medico Asistencial S.A.S, Carrera 49C #82-120, Barranquilla, 80020, Colombia                                                             | Comite De Etica En Investigacion Clinica De La Costa Ltd. Carrera 50, 80-144, Barranquilla, 0800, Colombia                                              |
| Servimed E.U., Calle 51 # 34 - 17, Bucaramanga, 680003, Colombia                                                                                                 | RESEARCH ETHICS COMMITTEE OF SERVIMED E.U., Calle 51 No. 34-17 Consultorio 208 C.C. Cabecera, Etapa, 230212, Colombia                                   |
| Medicity S.A.S., Carrera 34# 46 - 50, Bucaramanga, 680003, Colombia                                                                                              | Comité de ética en Investigaciones del Oriente, Carrera 34 # 46-50, Bucaramanga, 680003, Colombia                                                       |
| Centro Integral de Reumatología e Inmunología S.A.S., Carrera 12 # 97-32,, Bogota, Colombia                                                                      | Riesgo de Fractura SA - Research Ethics Committee, Carrera 20b No. 74 – 46, Bogeta, 110111, Colombia                                                    |
| <b>Estonia</b>                                                                                                                                                   |                                                                                                                                                         |
| Meditrials OÜ, Mõisavahe 34 C, Tartu, 50708, Estonia                                                                                                             | REC of the University of Tartu, Lossi 3, Tartu, 51003, Estonia                                                                                          |
| Parnu Hospital, Ristiku 1, Parnu, 80010, Estonia                                                                                                                 |                                                                                                                                                         |
| Kliiniliste Uuringute Keskus, Sobra 54, Tartu, 50106, Estonia                                                                                                    |                                                                                                                                                         |
| North Estonia Medical Center, J. Sutiste tee 19, Tallinn, 13419, Estonia                                                                                         |                                                                                                                                                         |
| Innomedica OÜ, Narva mnt. 7, Tallinn, 10117, Estonia                                                                                                             | REC of the University of Tartu, Lossi 3, Tartu, 51003, Estonia                                                                                          |
| Center for Clinical and Basic Research, Parna 4, Tallinn, 10128, Estonia                                                                                         | REC of the University of Tartu, Lossi 3, Tartu, 51003, Estonia                                                                                          |
| <b>France</b>                                                                                                                                                    |                                                                                                                                                         |
| Centre Hospitalier du Mans, Service de Rhumatologie, 194 Avenue Rubillard, Le Mans Cedex, 72037, France                                                          |                                                                                                                                                         |
| CHU Montpellier - Hôpital Lapeyronie, Unité Clinique d'Immuno-Rhumatologie Thérapeutique, 371, avenue du Doyen Gaston Giraud, Montpellier Cedex 5, 34295, France |                                                                                                                                                         |
| Centre Hospitalier Jean Rougier, Service de Rhumatologie, 335 rue du Président Wilson, Cahors, 46000, France                                                     | CPP Sud-Méditerranée III, UFR MEDECINE, 186, Chemin du Carreau de Lanes - CS 83021, Nimes Cedex 2, 30908, France                                        |
| Hôpital Lariboisière, Service de Rhumatologie, 2, rue Ambroise Paré, Paris cedex 10, 75475, France                                                               | CPP Sud-Méditerranée III, UFR MEDECINE, Chemin du Carreau de Lanes - CS 83021, Nimes Cedex 2, 30908, France                                             |

|                                                                                                               |                                                                                                                                                        |
|---------------------------------------------------------------------------------------------------------------|--------------------------------------------------------------------------------------------------------------------------------------------------------|
| Hôpital Kremlin Bicêtre, Service Rhumatologie, 78 rue du Général Leclerc, Le Kremlin-Bicêtre, 94275, France   |                                                                                                                                                        |
| CHU Nantes - Hôtel Dieu, Service de Rhumatologie, 1 Place Ricordeau, Nantes, 44093, France                    |                                                                                                                                                        |
| Hôpital Cochin, Service de rhumatologie A, 27 rue du Faubourg Saint-Jacques, Paris cedex 14, 75679, France    |                                                                                                                                                        |
| CHU Saint-Etienne Hôpital Bellevue, Service Rhumatologie, 25, boulevard Pasteur, Saint-Etienne, 42055, France |                                                                                                                                                        |
| <b>Germany</b>                                                                                                |                                                                                                                                                        |
| Universitaetsklinikum Carl Gustav Carus Dresden, Fetscherstr. 74, Dresden, Sachsen, 1307, Germany             | Ethikkommission an der Technischen Universität Dresden, Fetscherstr. 74, Dresden, Sachsen, 01307, Germany                                              |
| Centrum fuer Innovative Diagnostik und Therapie GmbH, Theodor-Stern-Kai 7, Frankfurt, 60590, Germany          | Ethikkommission an der Technischen Universität Dresden, Fetscherstr. 74, Dresden, Sachsen, 01307, Germany                                              |
| Rheumazentrum Ruhrgebiet, Claudiusstr. 45, Herne, Nordrhein-Westfalen, 44649, Germany                         | Ethikkommission an der Technischen Universität Dresden, Fetscherstr. 74, Dresden, Sachsen, 01307, Germany                                              |
| Charite Universitaetsmedizin Berlin CCM, Chariteplatz 1, Berlin, Berlin, 10117, Germany                       | Universitaetsklinikum Carl Gustav Carus Dresden, Fetscherstr. 74, Dresden, Sachsen, 01307, Germany                                                     |
| HRF Hamburger Rheuma Forschungszentrum, Moenckebergstrasse 27, Hamburg, Hamburg, 20095, Germany               | Ethikkommission an der Technischen Universität Dresden, Fetscherstr. 74, Dresden, Sachsen, 01307, Germany                                              |
| SMO.MD, Bierer Weg 9, Magdeburg, 39120, Germany                                                               | Ethikkommission an der Technischen Universität Dresden, Fetscherstr. 74, Dresden, Sachsen, 01307, Germany                                              |
| Krankenhaus Saint Josef, Bergstrasse 6 - 12, Wuppertal, Nordrhein-Westfalen, 42105, Germany                   | Ethikkommission an der Technischen Universität Dresden, Fetscherstr. 74, Dresden, Sachsen, 01307, Germany                                              |
| Krankenhaus Dresden Friedrichstadt, Friedrichstr. 41, Dresden, Sachsen, 1067, Germany                         | Ethikkommission an der Technischen Universität Dresden, Fetscherstr. 74, Dresden, Sachsen, 01307, Germany                                              |
| Studienzentrum Rendsburg, Hollesenstrasse 27a, Rendsburg, Schleswig-Holstein, 24768, Germany                  | Ethikkommission an der Technischen Universität Dresden, Fetscherstr. 74, Dresden, Sachsen, 01307, Germany                                              |
| Rheumazentrum Ratingen, Calor-Emag-Str. 3, Ratingen, Nordrhein-Westfalen, 40878, Germany                      | Ethikkommission an der Technischen Universität Dresden, Fetscherstr. 74, Dresden, Sachsen, 01307, Germany                                              |
| <b>Hungary</b>                                                                                                |                                                                                                                                                        |
| Csongrad Megyei Dr. Bugyi Istvan Korhaz, Sima Ferenc u. 44-58., Szentes, 6600, Hungary                        | Medical Research Council Ethics Committee for Clinical Pharmacology (MRC ECCP), Alkotmány utca 25, Széchenyi István tér 7-8, Budapest, H-1051, Hungary |
| Szegedi Tud.Egyetem Szent, Kalvaria sgt. 57., Szeged, 6725, Hungary                                           | Medical Research Council Ethics Committee for Clinical Pharmacology (MRC ECCP), Alkotmány utca 25, Széchenyi István tér 7-8, Budapest, H-1051, Hungary |
| Revita Reumatologiai Rendelo, Margit krt. 50-52., Budapest, 1023, Hungary                                     | Medical Research Council Ethics Committee for Clinical Pharmacology (MRC ECCP), Alkotmány utca 25, Széchenyi István tér 7-8, Budapest, H-1051, Hungary |
| Óbudai Egészségügyi Centrum Kft, Lajos utca 74-76., Budapest, 1036, Hungary                                   | Medical Research Council Ethics Committee for Clinical Pharmacology (MRC ECCP), Alkotmány                                                              |

|                                                                                                                                |                                                                                                                                                        |
|--------------------------------------------------------------------------------------------------------------------------------|--------------------------------------------------------------------------------------------------------------------------------------------------------|
|                                                                                                                                | utca 25, Széchenyi István tér 7-8, Budapest, H-1051, Hungary                                                                                           |
| Mentahaz Maganorvosi Kozpont, Nagy Laszlo u.1., Szekesfehervar, 8000, Hungary                                                  | Medical Research Council Ethics Committee for Clinical Pharmacology (MRC ECCP), Alkotmány utca 25, Széchenyi István tér 7-8, Budapest, H-1051, Hungary |
| <b>Japan</b>                                                                                                                   |                                                                                                                                                        |
| NHO Ureshino Medical Center, 4279-3, Oazashimojukuko, Ureshino-machi, Ureshino-city, Saga, 843-0393, Japan                     | NHO IRB, 2-5-21, Higashigaoka, Meguro-ku, Tokyo, 152-8621, Japan                                                                                       |
| Nagoya University Hospital, 65, Tsurumai-cho, Showa-ku, Nagoya-city, Aichi, 466-8560, Japan                                    | Nagoya University Hospital, 65, Tsurumai-cho, Showa-ku, Nagoya-city, Aichi, 466-8560, Japan                                                            |
| Hokkaido University Hospital, North 14, West 5, Kita-ku, Sapporo-shi, Hokkaido, 060-8648, Japan                                | Hokkaido University Hospital Institutional Review Board, North 14, West 5, Kita-ku, Sapporo-shi, Hokkaido, 060-8648, Japan                             |
| Kagawa University Hospital, 1750-1, Ikenobe, Miki-cho, Kita-gun, Kagawa, 761-0793, Japan                                       | Kagawa University Hospital Institutional Review Board, 1750-1, Ikenobe, Miki-cho, Kita-gun, Kagawa, 761-0793, Japan                                    |
| Chubu Rosai Hospital, 1-10-6, Komei, Minato-ku, Nagoya-city, Aichi, 455-8530, Japan                                            | Review Board of Human Rights and Ethics for Clinical Studies 13-2, Ichibancho Chiyoda-ku, Tokyo, 104-0031, Japan                                       |
| Kushiro Red Cross Hospital, 21-14, Shineicho, Kushiro-city, Hokkaido, 085-0032, Japan                                          | Kushiro Red Cross Hospital Institutional Review Board, 21-14, Shineicho, Kushiro-city, Hokkaido, 085-0032, Japan                                       |
| Sagawa Akira Rheumatology Clinic, 7, Kita-1jo Nishi, Chuo-ku, Sapporo-shi, Hokkaido, 060-0001, Japan                           | Jakushikai Nakameguro Atlas Clinic IRB, 1-26-1, Kamimeguro, Meguro-ku, Tokyo, 153-0051, Japan                                                          |
| Yokohama City Minato Red Cross Hospital, 3-12-1, Shinyamashita, Naka-ku, Yokohama-city, Kanagawa, 231-8682, Japan              | Yokohama City Minato Red Cross Hospital Institutional Review Board, 3-12-1, Shinyamashita, Naka-ku, Yokohama-city, Kanagawa, 231-8682, Japan           |
| Daido Clinic, 8, Hakusui-cho, Minami-ku, Nagoya-city, Aichi, 457-8511, Japan                                                   | Kojunk Daido Clinic, 8, Hakusui-cho, Minami-ku, Nagoya-city, Aichi, 457-8511, Japan                                                                    |
| National Hospital Organization Nagoya Medical Center, 4-1-1, Sannomaru, Naka-ku, Nagoya-city, Aichi, 460-0001, Japan           | NHO Institutional Review Board, 2-5-21, Higashigaoka, Meguro-ku, Tokyo, 152-8621, Japan                                                                |
| Tottori University Hospital, 36-1, Nishi-cho, Yonago-City, Tottori, 683-8504, Japan                                            | Tottori University Hospital, 36-1, Nishi-cho, Yonago-City, Tottori, 683-8504, Japan                                                                    |
| Hiroshima University Hospital, 1-2-3, Kasumi, Minami-ku, Hiroshima-city, Hiroshima, 734-8551, Japan                            | Hiroshima University Hospital, 1-2-3, Kasumi, Minami-ku, Hiroshima-city, Hiroshima, 734-8551, Japan                                                    |
| Kojyokai Hirose Clinic, 2-14-7, Midori-cho, Tokorozawa-shi, Saitama, 359-1111, Japan                                           | Medical Corporation Sugiura Hospital Institutional Review Board, 4-4-16-301, Honcho, Kawaguchi-shi, Saitama-Ken, 332-0012, Japan                       |
| Tomakomai City Hospital, 1-5-20, Shimizu-cho, Tomakomai-shi, Hokkaido, 053-8567, Japan                                         | Hayashi Tonyobyō Naika Clinic Institution Review Board, Shinei-cho 3-2, Chigasaki-shi, Kanagawa-Ken, 253-0044, Japan                                   |
| National Hospital Organization Yokohama Medical Center, 3-60-2, Harajuku, Totsuka-ku, Yokohama-city, Kanagawa, 245-8575, Japan |                                                                                                                                                        |
| Tohoku University Hospital, 1-1, Seiryō-machi, Aoba-ku, Sendai-city, Miyagi, 980-8574, Japan                                   | Tohoku University Hospital Institutional review Board, 1-1, Seiryō-machi, Aoba-ku, Sendai-city, Miyagi, 980-8574, Japan                                |
| Nagano Red Cross Hospital, 5-22-1, Wakasato, Nagano-shi, Nagano, 380-8582, Japan                                               | Review Board of Human Rights and Ethics for Clinical Studies, Kyobashi 2-2-1, Chuo-ku, Tokyo-To, 104-0031, Japan                                       |



|                                                                                                                                                  |                                                                                                                                     |
|--------------------------------------------------------------------------------------------------------------------------------------------------|-------------------------------------------------------------------------------------------------------------------------------------|
| Showa University East Hospital, 2-14-19, Nishinakanobu, Shinagawa-ku, Tokyo, 142-0054, Japan                                                     | Showa University East Hospital, 2-14-19, Nishinakanobu, Shinagawa-ku, Tokyo, 142-0054, Japan                                        |
| Showa University Hospital, 1-5-8, Hatanodai, Shinagawa-ku, Tokyo, 142-8666, Japan                                                                | Showa University Hospital Institutional Review Board, 1-5-8, Hatanodai, Shinagawa-ku, Tokyo, 142-8666, Japan                        |
| Toho University Ohashi Medical Center, 2-22-36, Ohashi, Meguro-ku, Tokyo, 153-8515, Japan                                                        | Toho University Ohashi Medical Center Institutional Review Board, 2-22-36, Ohashi, Meguro-ku, Tokyo, 153-8515, Japan                |
| Sapporo City General Hospital, 13-1-1, Kita11jo, Nishi, Chuo-ku, Sapporo-city, Hokkaido, 060-8604, Japan                                         | Sapporo City General Hospital Institutional Review Board, 13-1-1, Kita11jo, Nishi, Chuo-ku, Sapporo-city, Hokkaido, 060-8604, Japan |
| Nagasaki University Hospital, 1-7-1, Sakamoto, Nagasaki-city, Nagasaki, 852-8501, Japan                                                          | Nagasaki University Hospital, 1-7-1, Sakamoto, Nagasaki-city, Nagasaki, 852-8501, Japan                                             |
| Bay Side Misato Medical Center, 1617-5, Niida, Kochi-shi, Kochi, 781-0112, Japan                                                                 | IHL Shinagawa East One Medical Clinic IRB, 2-16-1, Konan, Minato-ku, Tokyo, 108-0075, Japan                                         |
| Medical Hospital, Tokyo Medical and Dental University, 1-5-45, Yushima, Bunkyo-ku, Tokyo, 113-8519, Japan                                        | Tokyo Medical and Dental University Hospital Institutional Review Board, 1-5-45, Yushima, Bunkyo-ku, Tokyo, 113-8519, Japan         |
| Japan Organization of Occupational Health and Safety Yokohama Rosai Hosp, 3211, Kozukue-cho, Kohoku-ku, Yokohama-city, Kanagawa, 222-0036, Japan | JOHAS Yokohama Rosai Hospital, Kohoku-ku Kozukue-cho 3211, Yokohama-shi, Kanagawa-Ken, 222-0036, Japan                              |
| Tohoku Medical and Pharmaceutical University Hospital, 1-12-1, Fukumuro, Miyagino-ku, Sendai-shi, Miyagi, 983-8512, Japan                        | Tohoku Medical and Pharmaceutical University Hospital, 1-12-1, Fukumuro, Miyagino-ku, Sendai-shi, Miyagi, 983-8512, Japan           |
| Shirahama Hamayu Hospital, 1447, Shirahama-cho, Nishimuro-gun, Wakayama, 649-2211, Japan                                                         | Koike, Tatsuya                                                                                                                      |
| Japanese Red Cross Okayama Hospital, 2-1-1, Aoe, Kita-ku, Okayama-city, Okayama, 700-8607, Japan                                                 | Japanese Red Cross Okayama Hospital Institutional Review Board, 2-1-1, Aoe, Kita-ku, Okayama-city, Okayama, 700-8607, Japan         |
| Chikamorikai Chikamori Hospital, 1-1-16, Okawasuji, Kochi-shi, Kochi, 780-8522, Japan                                                            | Chikamorikai Chikamori Hospital IRB, Okawasuji 1-1-16, Kochi-shi, Kochi-Ken, 780-8522, Japan                                        |
| Fukuoka University Hospital, 7-45-1, Nanakuma, Jonan-ku, Fukuoka-city, Fukuoka, 814-0180, Japan                                                  | Fukuoka University Hospital, 7-45-1, Nanakuma, Jonan-ku, Fukuoka-city, Fukuoka, 814-0180, Japan                                     |
| Matsubara Mayflower Hospital, 944-25, Fujita, Kato-city, Hyogo, 673-1462, Japan                                                                  | Matsubara Mayflower Hospital, 944-25, Fujita, Kato-city, Hyogo, 673-1462, Japan                                                     |
| Kagoshima Red Cross Hospital, 2545, Hirakawa-cho, Kagoshima-shi, Kagoshima, 891-0133, Japan                                                      | Kagoshima Red Cross Hospital IRB, Hirakawa-cho 2545, Kagoshima-shi, Kagoshima-Ken, 891-0133, Japan                                  |
| Sagamihara National Hospital, 18-1, Sakuradai, Minami-ku, Sagamihara-shi, Kanagawa, 252-0392, Japan                                              | NHO Institutional Review Board, 2-5-21 Higashigaoka Meguro-ko Tokyo, 152-8621, Japan                                                |
| Chiba-East Hospital, 673, Nitona-cho, Chuo-ku, Chiba-shi, Chiba, 260-8712, Japan                                                                 | NHO Institution Review Board, Higashigaoka 2-5-21, Meguro-ku, Tokyo-To, 152-8621, Japan                                             |
| Kita-Harima Medical Center, 926-250, Ichiba-cho, Ono-shi, Hyogo, 675-1392, Japan                                                                 | Sanyakai Maebashi, Hirosegawa Clinic IRB, Chiyoda-machi 2-10-9, Maebashi-shi, Gunma-Ken, 371-0022, Japan                            |
| Seirei Hamamatsu General Hospital, 2-12-12, Sumiyoshi, Naka-Ku, Hamamatsu-shi, Shizuoka, 430-8558, Japan                                         | Hamamatsu Clinical Research Network Institution Review Board, Naka-ku Sumiyoshi 2-12-12 Hamamatsu-shi, Shizuoka-Ken 430-8558, Japan |
| Ome Municipal General Hospital, 4-16-5, Higashi Ome, Ome-shi, Tokyo, 198-0042, Japan                                                             | Ome Municipal General Hospital, 4-16-5, Higashi Ome, Ome-shi, Tokyo, 198-0042, Japan                                                |

|                                                                                                                               |                                                                                                                                             |
|-------------------------------------------------------------------------------------------------------------------------------|---------------------------------------------------------------------------------------------------------------------------------------------|
| Tobata General Hospital, 1-3-33, Fukuryugi, tobata-ku, Kitakyushu-shi, Fukuoka, 804-0025, Japan                               | Nihonbashi Sakura Clinic, 5F, Inamura Building, 1-9-2, Nihonbashikayabacho, Chuo-ku, Tokyo, 103-0025, Japan                                 |
| Juntendo University Hospital, 3-1-3, Hongo, Bunkyo-ku, Tokyo, 113-8431, Japan                                                 | Juntendo University Hospital Institutional Review Board, 3-1-3, Hongo, Bunkyo-ku, Tokyo, 113-8431, Japan                                    |
| Hitachi Limited. Hitachinaka General Hospital, 20-1, Ishikawa-cho, Hitachinaka-city, Ibaraki, 312-0057, Japan                 | Review Board of Human Rights and Ethics for Clinical Studies, 13-2 Ichibancho, Chiyoda-ku, Tokyo, 102-0082, Japan                           |
| Yokohama City University Medical Center, 4-57, Urafune-cho, Minami-ku, Yokohama-city, Kanagawa, 232-0024, Japan               | Yokohama City University Medical Center, Institutional Review Board, 4-57, Urafune-cho, Minami-ku, Yokohama-city, Kanagawa, 232-0024, Japan |
| Saint Luke's International Hospital, 9-1, Akashi-cho, Chuo-ku, Tokyo, 104-8560, Japan                                         | Saint Luke's International Hospital Institution Review, Board, Akashi-cho 9-1 Chuo-ku Tokyo, 104-8560, Japan                                |
| Shimonoseki City Hospital, 1-13-1, Koyo-cho, Shimonoseki-shi, Yamaguchi, 750-8520, Japan                                      | Shimonoseki City Hospital IRB, Koyo-cho 1-13-1, Shimonoseki-shi, Yamaguchi-ken, 750-8520, Japan                                             |
| Nagaoka Red Cross Hospital, 2-297-1, Senshu, Nagaoka-shi, Niigata, 940-2085, Japan                                            | Nagaoka Red Cross Hospital, 2-297-1, Senshu, Nagaoka-shi, Niigata, 940-2085, Japan                                                          |
| Kumamoto Orthopaedic Hospital, 1-15-7, Kuhonji, Chuo-ku, Kumamoto-shi, Kumamoto, 862-0976, Japan                              | Kumamoto Orthopaedic Hospital, 1-15-7, Kuhonji, Chuo-ku, Kumamoto-shi, Kumamoto, 862-0976, Japan                                            |
| National Hospital Organization Shimoshizu National Hospital, 934-5, Shikawatashi, Yotsukaido-city, Chiba, 284-0003, Japan     | NHO Institutional Review Board, Higashigaoka 2-5-21 Meguro-ku, Tokyo, 152-8621, Japan                                                       |
| Seijinkai Hokkaido Medical Center for Rheumatic Diseases, 3-1-45, Kotoni1jo, Nishi-ku, Sapporo-shi, Hokkaido, 063-0811, Japan | Seijinkai Hokkaido Medical Center for Rheumatic Diseases IRB, Nishi-ku Kotoni 1jo 3-1-45, Sapporo-shi, Hokkaido, 063-0811, Japan            |
| National Hospital Organization Tokyo Hospital, 3-1-1, Takeoka, Kiyose-city, Tokyo, 204-8585, Japan                            | NHO Institutional Review Board, 2-5-21, Higashigaoka, Meguro-ku Tokyo, 152-8621 Japan                                                       |
| Nagasaki Medical Hospital of Rheumatology, 1-21, Aburaya-machi, Nagasaki-City, Nagasaki, 850-0832, Japan                      | Jakushikai Nakameguro Atlas Clinic IRB, 1-26-1, Kamimeguro, Meguro-ku, Tokyo, 153-0051, Japan                                               |
| Iizuka Hospital, 3-83, Yoshio-machi, Iizuka-shi, Fukuoka, 820-8505, Japan                                                     | Aso Co., Limited Iizuka Hospital Institutional Review Board, 3-83, Yoshio-machi, Iizuka-shi, Fukuoka, 820-8505, Japan                       |
| Hakujujikai Sasebo Chuo Hospital, -, 15, Yamato-cho, Sasebo-city, Nagasaki, 857-1195, Japan                                   | Hakujujikai Sasebo Chuo Hospital Institutional Review Board, -, 15, Yamato-cho, Sasebo-city, Nagasaki, 857-1195, Japan                      |
| Okayama City Hospital, 3-20-1, Kitanagaseomotemachi, Kita-ku, Okayama-shi,, Okayama, 700-8557, Japan                          | Okayama City Hospital, 3-20-1, Kitanagaseomotemachi, Kita-ku, Okayama-shi,, Okayama, 700-8557, Japan                                        |
| Okayama Saiseikai Outpatient Center Hospital, 1-17-18, Ifuku-cho, Kita-ku, Okayama-shi, Okayama, 700-0013, Japan              | Okayama Saiseikai General Hospital, 2-25, Kokutai-cho, Kita-ku, Okayama-city, Okayama, 700-8511, Japan                                      |
| Yokohama City University Hospital, 3-9, Fukuura, Kanazawa-ku, Yokohama-city, Kanagawa, 236-0004, Japan                        | Yokohama City University Hospital Institutional Review Board, 3-9, Fukuura, Kanazawa-ku, Yokohama-city, Kanagawa, 236-0004, Japan           |
| <b>Republic of Korea</b>                                                                                                      |                                                                                                                                             |
| SoonChunHyang University Hospital Cheonan, 31, Suncheonhyang 6-gil, Dongnam-gu, Cheonan-si, 31151, Republic of Korea          | SoonChunHyang University Hospital Cheonan, 31, Suncheonhyang 6-gil, Dongnam-gu, Cheonan-si, 31151, Republic of Korea                        |
| The Catholic University of Korea Seoul St. Mary's Hospital, 222 Banpo-Daero, Seocho-gu, Seoul, 6591, Republic of Korea        | The Catholic University of Korea Seoul St. Mary's Hospital, 222 Banpo-Daero, Seocho-gu, Seoul, 6591, Republic of Korea                      |

|                                                                                                                                                          |                                                                                                                                     |
|----------------------------------------------------------------------------------------------------------------------------------------------------------|-------------------------------------------------------------------------------------------------------------------------------------|
| Kyungpook National University Hospital, 130, Dongdeok-ro, Jung-gu, Daegu, 41944, Republic of Korea                                                       | Kyungpook National University Hospital, 130, Dongdeok-ro, Jung-gu, Daegu, 41944, Republic of Korea                                  |
| Hallym University Sacred Heart Hospital, 22 Gwanpyeong-ro 170beon-gil, Dongan-gu, Anyang-si, 431-070, Republic of Korea                                  | Hallym University Sacred Heart Hospital, 22 Gwanpyeong-ro 170beon-gil, Dongan-gu, Anyang-si, 431-070, Republic of Korea             |
| Keimyung University Dongsan Hospital, 1035, Dalgubeol-daero, Dalseo-gu, Daegu-si, 42601, Republic of Korea                                               | Keimyung University Dongsan Hospital, 1035, Dalgubeol-daero, Dalseo-gu, Daegu-si, 42601, Republic of Korea                          |
| Asan Medical Center-Seoul-Korea-C, 88, Olympic-ro, 43-gil, Songpa-gu, Seoul, 5505, Republic of Korea                                                     | Asan Medical Center-Seoul-Korea-C, 88, Olympic-ro, 43-gil, Songpa-gu, Seoul, 5505, Republic of Korea                                |
| Seoul National University Hospital, 101 Daehak-ro Jongno-gu, Seoul, 3080, Republic of Korea                                                              | Seoul National University Hospital, 101 Daehak-ro Jongno-gu, Seoul, 3080, Republic of Korea                                         |
| Chonnam National University Hospital, 42 Jebong-ro, Dong-gu, Gwangju, 61469, Republic of Korea                                                           | Chonnam National University Hospital, 42 Jebong-ro, Dong-gu, Gwangju, 61469, Republic of Korea                                      |
| Seoul National University Bundang Hospital, 82 Gumi-ro 173 beon-gil, Bundang-gu, Seongnam-si, Gyeonggi-do, 13620, Republic of Korea                      | Seoul National University Bundang Hospital, 82 Gumi-ro 173 beon-gil, Bundang-gu, Seongnam-si, Gyeonggi-do, 13620, Republic of Korea |
| Inha University Hospital, 27, Inhang-ro, Jung-gu,, Incheon, 22332, Republic of Korea                                                                     | Inha University Hospital, 27, Inhang-ro, Jung-gu,, Incheon, 22332, Republic of Korea                                                |
| Severance Hospital, Yonsei University Health System, 50-1 Yonsei-ro Seodaemun-gu, Seoul, 3722, Republic of Korea                                         | Severance Hospital, Yonsei University Health System, 50-1 Yonsei-ro Seodaemun-gu, Seoul, 3722, Republic of Korea                    |
| Chungnam National University Hospital, 282 Munhwa-ro, Jung-gu, Daejeon, 301-721, Republic of Korea                                                       | Chungnam National University Hospital, 282 Munhwa-ro, Jung-gu, Daejeon, 301-721, Republic of Korea                                  |
| Ajou University Hospital, 164, World Cup-ro, Yeongtong-gu, Suwon, 16499, Republic of Korea                                                               | Ajou University Hospital, 164, World Cup-ro, Yeongtong-gu, Suwon, 16499, Republic of Korea                                          |
| Kyung Hee University Hospital at Gangdong, 149 Sangil-dong, Seoul, 134-727, Republic of Korea                                                            | Kyung Hee University Hospital at Gangdong, 149 Sangil-dong, Seoul, 134-727, Republic of Korea                                       |
| Hanyang University Seoul Hospital, 222-1 Wangsimni-ro Seongdong-gu, Seoul, 4763, Republic of Korea                                                       | Hanyang University Seoul Hospital, 222-1 Wangsimni-ro Seongdong-gu, Seoul, 4763, Republic of Korea                                  |
| Jeonbuk national university hospital, 20, Geonjiro, Deokjin-gu, Jeonju-si, Jeollabuk-do, 54907, Republic of Korea                                        | Jeonbuk national university hospital, 20, Geonjiro, Deokjin-gu, Jeonju-si, Jeollabuk-do, 54907, Republic of Korea                   |
| <b>Mexico</b>                                                                                                                                            |                                                                                                                                     |
| MedCare & Research SA de CV, Colinia Garcia Gineres, Merida, Calle 32x11 -A N0. 217, Yucatan, Yucatán, 97070, Mexico.                                    | Medical Care and Research S.A. de C.V., Calle 32 Numero 217 por 11-A Garcia Gineres, Merida, Yucatán, 97070, Mexico.                |
| Clinica de Investigacion en Reumatologia y Obesidad, Avenida Luis Perez Verdía 487, Guadalajara, Jalisco, 44650, Mexico.                                 | COFEPRIS, Oklahoma 14, Col. Nápoles, Delegación Benito Juárez, México, Distrito Federal, 03810, Mexico.                             |
| Clinstile, S.A. de C.V., Durango Av., N. 325, int.603-604, Mexico City, Durango, 6700, Mexico                                                            |                                                                                                                                     |
| Centro de Investigacion en Reumatologia, Col. García Ginerés, Calle 7 No. 215-A Interior 206, Merida, Yucatán, 97070, Mexico                             | Centro de Investigacion en Reumatologia, Col. García Ginerés, Calle 7 No. 215-A Interior 206, Merida, Yucatán, 97070, Mexico        |
| Centro de Alta Especialidad en Reumatologia e Investigacion del Potosi, Jose I. Puebla #210 – Col. Burocratas del Estado, San Luis Potosí, 78213, Mexico |                                                                                                                                     |
| <b>Poland</b>                                                                                                                                            |                                                                                                                                     |

|                                                                                                            |                                                                                                                          |
|------------------------------------------------------------------------------------------------------------|--------------------------------------------------------------------------------------------------------------------------|
| ETG Siedlce, ul. Młynarska 16 lok. B, Siedlce, 08-110, Poland.                                             | Kom Bioet przy Okręgowej Izbie Lekarskiej Wielkopolskiej Izby Lekarskiej, ul. Nowowiejskiego 51, Poznań, 61-734, Poland. |
| Centrum Kliniczno-Badawcze Lekarze Spolka Partnerska, ul. Studzienna 35-36/A, Elbląg, 82-300, Poland.      | Kom Bioet przy Okręgowej Izbie Lekarskiej Wielkopolskiej Izby Lekarskiej, ul. Nowowiejskiego 51, Poznań, 61-734, Poland. |
| Reumed Zespół Poradni Specjalistycznych Filia nr 2, ul. Onyksowa 10, Lublin, 20-582, Poland                | Kom Bioet przy Okręgowej Izbie Lekarskiej Wielkopolskiej Izby Lekarskiej, ul. Nowowiejskiego 51, Poznań, 61-734, Poland. |
| Synexus Polska Sp. z o.o. Oddział w Gdyni, ul. Luzycka 3c, Gdynia, 81-537, Poland.                         | Kom Bioet przy Okręgowej Izbie Lekarskiej Wielkopolskiej Izby Lekarskiej, ul. Nowowiejskiego 51, Poznań, 61-734, Poland. |
| Synexus Polska Sp. z o.o., ul. Konckiego 3, Katowice, 40-040, Poland.                                      | Kom Bioet przy Okręgowej Izbie Lekarskiej Wielkopolskiej Izby Lekarskiej, ul. Nowowiejskiego 51, Poznań, 61-734, Poland. |
| Medicenter Nowy Targ, ul. Długa 161, Nowy Targ, 34-400, Poland.                                            | Kom Bioet przy Okręgowej Izbie Lekarskiej Wielkopolskiej Izby Lekarskiej, ul. Nowowiejskiego 51, Poznań, 61-734, Poland. |
| Synexus Polska sp. z o.o. Oddział w Poznaniu, ul. Głogowska 31/33, Poznań, 60-702, Poland.                 | Kom Bioet przy Okręgowej Izbie Lekarskiej Wielkopolskiej Izby Lekarskiej, ul. Nowowiejskiego 51, Poznań, 61-734, Poland. |
| Synexus Polska Sp. z o.o. Oddział w Łodzi, ul. Składowa 35, Łódź, 90-127, Poland.                          | Kom Bioet przy Okręgowej Izbie Lekarskiej Wielkopolskiej Izby Lekarskiej, ul. Nowowiejskiego 51, Poznań, 61-734, Poland. |
| Nasz Lekarz Ośrodek Badan Klinicznych, ul. Chodkiewicza 19C, Bydgoszcz, 85-065, Poland.                    | Kom Bioet przy Okręgowej Izbie Lekarskiej Wielkopolskiej Izby Lekarskiej, ul. Nowowiejskiego 51, Poznań, 61-734, Poland. |
| PRATIA MCM Krakow, ul. Rejtana 2, Krakow, 30-510, Poland.                                                  | Kom Bioet przy Okręgowej Izbie Lekarskiej Wielkopolskiej Izby Lekarskiej, ul. Nowowiejskiego 51, Poznań, 61-734, Poland. |
| ETYKA Ośrodek Badan Klinicznych, ul. 1 Maja 13, Olsztyn, 10-117, Poland.                                   | Kom Bioet przy Okręgowej Izbie Lekarskiej Wielkopolskiej Izby Lekarskiej, ul. Nowowiejskiego 51, Poznań, 61-734, Poland. |
| Globe Badania Kliniczne, UL. KUSOCINSKIEGO 3A, Klodzko, 57-300, Poland.                                    | Kom Bioet przy Okręgowej Izbie Lekarskiej Wielkopolskiej Izby Lekarskiej, ul. Nowowiejskiego 51, Poznań, 61-734, Poland. |
| Amicare Sp. z o.o. Sp.k, ul. gen. Lucjana Zeligowskiego 46 lok. 10, Łódź, 90-644, Poland                   | Kom Bioet przy Okręgowej Izbie Lekarskiej Wielkopolskiej Izby Lekarskiej, ul. Nowowiejskiego 51, Poznań, 61-734, Poland. |
| MGBK S.C., ul. Daleka 32, Grodzisk Mazowiecki, 05-825, Poland.                                             | Kom Bioet przy Okręgowej Izbie Lekarskiej Wielkopolskiej Izby Lekarskiej, ul. Nowowiejskiego 51, Poznań, 61-734, Poland. |
| Centrum Medyczne Oporow, Solskiego 4A/1, Wrocław, 52-416, Poland.                                          | Kom Bioet przy Okręgowej Izbie Lekarskiej Wielkopolskiej Izby Lekarskiej, ul. Nowowiejskiego 51, Poznań, 61-734, Poland. |
| ClinicMed Daniluk, Nowak Spolka Jawna, ul. Stoleczna 7 lok. 200, Białystok, 15-879, Poland.                | Kom Bioet przy Okręgowej Izbie Lekarskiej Wielkopolskiej Izby Lekarskiej, ul. Nowowiejskiego 51, Poznań, 61-734, Poland. |
| Instytut Reumatologii im. Prof. dr hab. med. Eleonory Reicher, ul. Spartanska 1, Warszawa, 02-637, Poland. | Kom Bioet przy Okręgowej Izbie Lekarskiej Wielkopolskiej Izby Lekarskiej, ul. Nowowiejskiego 51, Poznań, 61-734, Poland. |
| Centrum Medyczne All-Med, ul. Henryka Sienkiewicza 23, Krakow, 30-033, Poland.                             | Kom Bioet przy Okręgowej Izbie Lekarskiej Wielkopolskiej Izby Lekarskiej, ul. Nowowiejskiego 51, Poznań, 61-734, Poland. |
| ETG Warszawa, Ul. Belgradzka 52/54, Warszawa, 02-793, Poland.                                              | Kom Bioet przy Okręgowej Izbie Lekarskiej Wielkopolskiej Izby Lekarskiej, ul. Nowowiejskiego 51, Poznań, 61-734, Poland. |

|                                                                                                                                             |                                                                                                                                             |
|---------------------------------------------------------------------------------------------------------------------------------------------|---------------------------------------------------------------------------------------------------------------------------------------------|
| Synexus Polska sp. z o.o. Oddział we Wrocławiu, Ul. Marii. Curie-Skłodowskiej 12, Wrocław, 50-381, Poland.                                  | Kom Bioet przy Okręgowej Izbie Lekarskiej Wielkopolskiej Izby Lekarskiej, ul. Nowowiejskiego 51, Poznań, 61-734, Poland.                    |
| ai centrum medyczne sp. z o.o. sp.k., ul. Swietojanska 1, Poznan, 61-113, Poland.                                                           | Kom Bioet przy Okręgowej Izbie Lekarskiej Wielkopolskiej Izby Lekarskiej, ul. Nowowiejskiego 51, Poznań, 61-734, Poland.                    |
| Silmedic sp. z o.o., ul. Sikorskiego 30 lok 70, Katowice, 40-282, Poland.                                                                   | Kom Bioet przy Okręgowej Izbie Lekarskiej Wielkopolskiej Izby Lekarskiej, ul. Nowowiejskiego 51, Poznań, 61-734, Poland.                    |
| Synexus Polska Sp. z o.o. Oddział w Częstochowie, Waly Generała Jozefa Dwernickiego 43/45, Częstochowa, 42202, Poland.                      | Kom Bioet przy Okręgowej Izbie Lekarskiej Wielkopolskiej Izby Lekarskiej, ul. Nowowiejskiego 51, Poznań, 61-734, Poland.                    |
| Synexus Polska SCM Sp. z o.o. Gdansk, Beniowskiego 23, Gdansk, 80-382, Poland.                                                              | Kom Bioet przy Okręgowej Izbie Lekarskiej Wielkopolskiej Izby Lekarskiej, ul. Nowowiejskiego 51, Poznań, 61-734, Poland.                    |
| Synexus Polska Sp. z o.o., ul. Leszno 12, Warszawa, 01-192, Poland.                                                                         | Kom Bioet przy Okręgowej Izbie Lekarskiej Wielkopolskiej Izby Lekarskiej, ul. Nowowiejskiego 51, Poznań, 61-734, Poland.                    |
| RCMed, ul. Zeromskiego 41A, Sochaczew, 96-500, Poland                                                                                       | Kom Bioet przy Okręgowej Izbie Lekarskiej Wielkopolskiej Izby Lekarskiej, ul. Nowowiejskiego 51, Poznań, 61-734, Poland.                    |
| Medycyna Kliniczna, ul. Wronia 53 lok. B10 (Green Corner), Warszawa, 00-874, Poland.                                                        | Kom Bioet przy Okręgowej Izbie Lekarskiej Wielkopolskiej Izby Lekarskiej, ul. Nowowiejskiego 51, Poznań, 61-734, Poland.                    |
| <b>Russian Federation</b>                                                                                                                   |                                                                                                                                             |
| City Hospital #8, Suzdalskoe shosse, 39, Yaroslavl, 150030, Russian Federation.                                                             | Clinical Hospital #2, 39 Suzdalskoe shosse, Yaroslavl, 150030, Russian Federation.                                                          |
| Siberian State Medical University, 2, Moscovskiy trakt, Tomsk, 634050, Russian Federation.                                                  | LEC under Siberian State Medical University of Roszdrav, 2, Moskovsky trakt, Tomsk, 634050, Russian Federation.                             |
| Sverdlovsk Regional Clinical Hospital # 1, 185, Volgogradskaya Street, Ekaterinburg, 620102, Russian Federation.                            | Sverdlovsk Regional Clinical Hospital # 1, 185, Volgogradskaya Street, Ekaterinburg, 620102, Russian Federation.                            |
| Kemerovo Regional Clinical Hospital, 22, Oktyabrsky pr., Kemerovo, 650066, Russian Federation.                                              | Kemerovo Regional Clinical Hospital, 22, Oktyabrsky pr., Kemerovo, 650066, Russian Federation.                                              |
| City Rheumatology Center, Hospital #25, 30, Bolshaya Podyacheskaya, Saint-Petersburg, 190068, Russian Federation.                           | Clinical Rheumatological Hospital # 25, 30, Bolshaya Pod'yacheskay str, Saint-Petersburg, 190068, Russian Federation.                       |
| City Clinical Hospital #15 n.a. O.M.Filatov, 23, Veshnyakovskaya ul., Moscow, 111539, Russian Federation.                                   | Moscow City Independent Ethics Committee, 12, bld, 2, Minskaya street, Moscow, 121096, Russian Federation.                                  |
| LLC Consultative and Diagnostic Center of Rheumatology "Healthy Joints", 30, Ordzhonikidze street, Novosibirsk, 630099, Russian Federation. | LLC Consultative and Diagnostic Center of Rheumatology "Healthy Joints", 30, Ordzhonikidze street, Novosibirsk, 630099, Russian Federation. |
| Family polyclinic № 4, Stanzionnaya str., 33, Korolev, 141060, Russian Federation.                                                          | LEC of OOO "Family polyclinic", Stanzionnaya str.33, Korolev, Moscow Region, 141060                                                         |
| State Autonomous Healthcare Institution of Yaroslavl region Hospital # 3, 61,Mayakovskogo street, Yaroslavl, 150007, Russian Federation.    |                                                                                                                                             |
| Moscow Regional Research Clinical Institute n.a. M.F.Vla, 61/2, Shchepkina ul., Moscow, 129110, Russian Federation.                         | Moscow Regional Research Clinical Institute n.a. M.F.Vla, 61/2, Shchepkina ul., Moscow, 129110, Russian Federation.                         |
| Yaroslavl Regional Clinical Hospital, Yakovlevskaya street, 7, Yaroslavl, 150062, Russian Federation.                                       | Yaroslavl Regional Clinical Hospital, Yakovlevskaya street, 7, Yaroslavl, 150062, Russian Federation.                                       |

|                                                                                                                                                        |                                                                                                                                                                                                                 |
|--------------------------------------------------------------------------------------------------------------------------------------------------------|-----------------------------------------------------------------------------------------------------------------------------------------------------------------------------------------------------------------|
| Centre of Common Medical Practice LLC, 7/1, Krylova street, Novosibirsk, 630091, Russian Federation.                                                   | Centre of Common Medical Practice LLC, 7/1, Krylova street, Novosibirsk, 630091, Russian Federation.                                                                                                            |
| LLC "Medical Center" Revma-Med ", 6-4, Molodezhny prospekt, Kemerovo, 650070, Russian Federation.                                                      | LLC "Medical Center" Revma-Med ", 6-4, Molodezhny prospekt, Kemerovo, 650070, Russian Federation.                                                                                                               |
| LLC Practical Medicine, room XII, Birulevskaya str, 1/3,, Moscow, 115404, Russian Federation.                                                          | LLC Practical Medicine, room XII, Birulevskaya str, 1/3, Moscow, 115404, Russian Federation.                                                                                                                    |
| LLC ULTRAMED, 19/12, Krasnykh Zor corner Chkalova str, Omsk, 644024, Russian Federation.                                                               | LLC Ultramed, 19/12, Krasnykh Zor corner Chkalova str, Omsk, 644024, Russian Federation.                                                                                                                        |
| LLC Medical Centre "Maximum Health", Pritomsky prospekt 35, bldg.1, Kemerovo, 650066, Russian Federation.                                              | LLC Medical Centre "Maximum Health", Pritomsky prospekt 35, bldg.1, Kemerovo, 650066, Russian Federation.                                                                                                       |
| Krasnoyarsk State Medical University, 12, Instrumentalnaya, Krasnoyarsk, 660123, Russian Federation.                                                   | Krasnoyarsk State Medical University, 12, Instrumentalnaya, Krasnoyarsk, 660123, Russian Federation.                                                                                                            |
| Ulyanovsk Regional Clinical Hospital, 7, ul. III-go Internatsionala, Ulyanovsk, 432063, Russian Federation.                                            | LEC of SHI Ulyanovsk Reg Clinical Hospital, 7, Street of III International, Ulyanovsk, 432063                                                                                                                   |
| Federal State Budgetary Scientific Inst Research Institute of Rheumatology, V.A. Nasonova, 34A, Kashirskoe shosse, Moscow, 115522, Russian Federation. | Rheumatology Research Institute, Kashirskoye shosse, 34 A, Moscow, 115522, Russian Federation.                                                                                                                  |
| <b>Spain</b>                                                                                                                                           |                                                                                                                                                                                                                 |
| Hospital Universitario Ramon y Cajal, Carretera de Colmenar Viejo km 9,100, Madrid, 28034, Spain.                                                      | Hospital General Universitario Gregorio Marañón, C/ Doctor Esquerdo, 46, Madrid, Madrid, 28007, Spain.                                                                                                          |
| Hospital Universitario Marqués de Valdecilla, Avda.de Valdecilla s/n, Santander, 39008, Spain.                                                         | Hospital General Universitario Gregorio Marañón, Dr Esquerdo 46, Madrid, 28007, Spain.                                                                                                                          |
| Hospital de Merida, Poligono Nueva Ciudad S/N, Merida, 6800, Spain.                                                                                    | Hospital General Universitario Gregorio Marañón, Dr Esquerdo 46, Madrid, 28007, Spain.                                                                                                                          |
| Hospital de la Santa Creu y Sant Pau, Sant Antoni Maria Claret 167, Barcelona, 8025, Spain.                                                            | Hospital Gregorio Marañón, C/ Dr. Esquerdo, 46, Madrid, 28007, Spain.                                                                                                                                           |
| Hospital Nuestra Sra. de Valme, Ctra. de Cádiz-Bellavista, km.548,9n, Sevilla, 41014, Spain.                                                           | Hospital General Universitario, Pabellón de Gobierno, Primera Planta, C/ Dr. Esquerdo 46, Madrid, 28007, Spain.                                                                                                 |
| Hospital Universitari Vall d'Hebron, Passeig Vall d'Hebron 119-129, Barcelona, 8035, Spain.                                                            | Hospital Gregorio Marañón, C/ Dr. Esquerdo, 46, Madrid, 28007, Spain.                                                                                                                                           |
| Hospital del Mar, Passeig Maritim 25-29, Badalona, Catalonia, 08003, Spain.                                                                            | Hospital Gregorio Marañón, C/ Dr. Esquerdo, 46, Madrid, 28007, Spain.                                                                                                                                           |
| Hospital Universitario Virgen Macarena, Avd. Dr Fedriani, 3, Sevilla, 41007, Spain.                                                                    | Hospital Gregorio Marañón, C/ Dr. Esquerdo, 46, Madrid, 28007, Spain.                                                                                                                                           |
| <b>Thailand</b>                                                                                                                                        |                                                                                                                                                                                                                 |
| Rajavithi Hospital, 2 Phayathai Rd., Rachathewe, Bangkok, 10400, Thailand.                                                                             | Central Research Ethics Committee (CREC), National Research Council of Thailand, 196 Phahonyothin Rd, Lat Yao, Chatuchak, Bangkok, Bangkok, 10900, Thailand.                                                    |
| Siriraj Hospital, Division of Rheumatology, 2 Prannok road, Bangkok, 10700, Thailand                                                                   | Siriraj Institutional Review Board (SiRB), His Majesty the King's 80th Birthday Anniversary, 5th December 2007 Building. 2nd Floor, Room no. 210. 2 Prannok Road, Prannok, Bangkoknoi, Bangkok, 10700, Thailand |
| Srinagarind Hospital, 123 Mittrapharb Road., Muang, 40002, Thailand                                                                                    | Central Research Ethics Committee (CREC), National Research Council of Thailand, 196                                                                                                                            |

|                                                                                                                          |                                                                                                                                                      |
|--------------------------------------------------------------------------------------------------------------------------|------------------------------------------------------------------------------------------------------------------------------------------------------|
|                                                                                                                          | Phahonyothin Rd, Lat Yao, Chatuchak, Bangkok, Bangkok, 10900, Thailand                                                                               |
| Phramongkutklao Hospital, 315 Rajavithi Road, Rajathevee, 10400, Thailand.                                               | Narongroeknawin, Pongthorn. MD, 315 Rajavithi Road, Rajathevee, 10400, Thailand.                                                                     |
| Prince of Songkla University, Department of Medicine, 15 Karnjanavanit Road, Songkla, 90110, Thailand.                   | Central Research Ethics Committee, 5th Fl. bulding 2, The National Research Council of Thailand, Paholyothin Rd.,Bangkhen, Bangkok, 10900, Thailand. |
| <b>United Kingdom</b>                                                                                                    |                                                                                                                                                      |
| Accellacare East London, Blackburn House, 22-26 Eastern Road, Romford, Essex, RM1 3PJ, United Kingdom                    | NA                                                                                                                                                   |
| Medinova Clinical Reasearch Ltd, Rickmansworth Rd, Northwood, HA6 2RN, United Kingdom                                    | NA                                                                                                                                                   |
| Mile End Hospital, Bancroft Road, London, London, E1 4DG, United Kingdom                                                 | NA                                                                                                                                                   |
| Western General Hospital, Crewe Road, Edinburgh, EH4 2XU, United Kingdom                                                 | NA                                                                                                                                                   |
| Medinova Warwickshire Quality Research Site, 42 Station Road, Kenilworth, Warwickshire, CV8 1JD, United Kingdom          | Accellacare – Amendments, ACCELLACARE Head Office, Friars House, Manor House Drive, Coventry, West Midlands, CV1 2TE, United Kingdom                 |
| <b>United States of America</b>                                                                                          |                                                                                                                                                      |
| DM Clinical Research, Suite 53, 13406 Medical Complex Drive, Tomball, Texas, 77375, United States                        | Copernicus Group, Suite 200, 5000 Centregreen Way, Cary, North Carolina, 27513, United States.                                                       |
| Denver Arthritis Clinic, Suite 100, 200 Spruce Street, Denver, Colorado, 80230, United States                            | Copernicus Group Institutional Review Board, Suite 200, 5000 Centregreen Way, Cary, North Carolina, 27513, United States                             |
| Riverside Medical Clinic, 7117 Brockton Avenue, Riverside, California, 92506, United States                              | Copernicus Group Institutional Review Board, Suite 200, 5000 Centregreen Way, Cary, North Carolina, 27513, United States                             |
| Clinical Trials of SW Louisiana LLC, 600 Bayou Pines East Drive, Lake Charles, Louisiana, 70601, United States           | Copernicus Group Institutional Review Board, Suite 200, 5000 Centregreen Way Cary, North Carolina, 27513, United States                              |
| Precision Comprehensive Clinical Research Solutions, Suite 200, 1452 Hughes Road, Grapevine, Texas, 76051, United States | Copernicus Group IRB, 5000 CentreGreen Way, Suite 200, Cary, North Carolina, 27513, United States                                                    |
| Arizona Arthritis & Rheumatology Research, 2152 S Vineyard Ave Suite 129, Mesa, Arizona, 85210, United States            | Copernicus Group, Suite 200, 5000 Centregreen Way, Cary, North Carolina, 27513, United States.                                                       |
| Clinical Pharmacology Study Group, 25 Oak Ave, Worcester, Massachusetts, 1605, United States.                            | Copernicus Group, Suite 200, 5000 Centregreen Way, Cary, North Carolina, 27513, United States.                                                       |
| Arthritis Center of North Georgia, 961A Smoky Mountain Springs Lane, Gainesville, Georgia, 30501, United States          | Copernicus Group, Suite 200, 5000 Centregreen Way, Cary, North Carolina, 27513, United States.                                                       |
| Cullman Clinical Trials, 501 Clark Street NE, Cullman, Alabama, 35055, United States                                     | Copernicus Group, Suite 200, 5000 Centregreen Way, Cary, North Carolina , 27513 United States                                                        |
| Health Research of Oklahoma, PLLC, Suite 409, 1211 N. Shartel Avenue, Oklahoma City, Oklahoma, 73103, United States      | Copernicus Group, Suite 200, 5000 Centregreen Way, Cary, North Carolina , 27513 United States                                                        |
| Amarillo Center for Clinical Research, 6842 Plum Creek Dr, Amarillo, Texas, 79124, United States                         | Copernicus Group IRB, 5000 CentreGreen Way, Suite 200, Cary, North Carolina, 27513, United States                                                    |

|                                                                                                                                      |                                                                                                                          |
|--------------------------------------------------------------------------------------------------------------------------------------|--------------------------------------------------------------------------------------------------------------------------|
| Accurate Clinical Research, Suite 135, 7959 Fredericksburg Road, San Antonio, Texas, 78229, United States                            | Copernicus Group IRB, 5000 CentreGreen Way, Suite 200, Cary, North Carolina, 27513, United States                        |
| Triwest Research Associates, 300 S.Pierce Street, Suite 201, El Cajon, California, 92020, United States                              | Copernicus Group, Suite 200, 5000 Centregreen Way, Cary, North Carolina, 27513, United States.                           |
| Trinity Medical Group Health Center - Medical Arts, 400 East Burdick Expressway, Minot, North Dakota, 58701, United States           | Trinity Hospital Institutional Review Board, One Burdick Expressway West, Minot, North Dakota, 58701, United States      |
| Dore, Robin K., 12791 Newport Avenue, Tustin, California, 92780, United States                                                       | Copernicus Group, Suite 200, 5000 Centregreen Way, Cary, North Carolina, 27513, United States.                           |
| The Alliance of Multispecialty Research, LLC, Suite 426/224A, 1010 Carondelet Drive, Kansas City, Missouri, 64114, United States.    | Copernicus Group, Suite 200, 5000 Centregreen Way, Cary, North Carolina, 27513, United States.                           |
| Texas Medical and Surgical Associates, Suite 580, 8440 Walnut Hill Lane, Dallas, Texas, 75231, United States.                        | Copernicus Group, Suite 200, 5000 Centregreen Way, Cary, North Carolina, 27513, United States.                           |
| Mercy Research, 3231 National Ave, Springfield, Missouri, 65714, United States                                                       | Western Institutional Review Board, 1019 39th Avenue SE, Puyallup, Washington, 98374, United States                      |
| Arthritis and osteoporosis associates, 4247 Route 9 north, Freehold, New Jersey, 7728, United States                                 | Copernicus Group, Suite 200, 5000 Centregreen Way, Cary, North Carolina, 27513, United States.                           |
| Metroplex Clinical Research Center, 8144 Walnut Hill Lane, Dallas, Texas, 75231, United States.                                      | Copernicus Group, Suite 200, 5000 Centregreen Way, Cary, North Carolina, 27513, United States.                           |
| Columbia Arthritis Center, P.A., 1711 St. Julian Place, Columbia, South Carolina, 29204, United States                               | Copernicus Group, Suite 200, 5000 Centregreen Way, Cary, North Carolina, 27513, United States.                           |
| RASF Clinical Research Center, Suite 212A, 1050 NW 15th Street, Boca Raton, Florida, 33489, United States                            | Copernicus Group, Suite 200, 5000 Centregreen Way, Cary, North Carolina, 27513, United States.                           |
| Graves Gilbert Clinic, 201 Park Street, Bowling Green, Kentucky, 42101, United States                                                | Copernicus Group Institutional Review Board, Suite 200, 5000 Centregreen Way, Cary, North Carolina, 27513, United States |
| Clinical Interventions Research Institute, Suite 708, 16300 Sand Canyon Avenue, Irvine, California, 92618, United States             | Copernicus Group IRB, 5000 CentreGreen Way, Suite 200, Cary, North Carolina, 27513, United States                        |
| Arthritis & Rheumatic Disease Specialties, Suite 801, 2801 NE 213th Street, Aventura, Florida, 33180, United States                  | Copernicus Group, Suite 200, 5000 Centregreen Way, Cary, North Carolina, 27513, United States.                           |
| Stanford University, Suite 203, 1000 Welch Road, Palo Alto, California, 94304, United States                                         |                                                                                                                          |
| West Virginia Research Institute PLLC, Suite 402, 4610 Kanawha Avenue SW, South Charleston, West Virginia, 25309, United States      | Copernicus Group, Suite 200, 5000 Centregreen Way, Cary, North Carolina, 27513, United States                            |
| NYU Langone Ambulatory Care, 186 Joralemon Street, 8th Floor, Brooklyn, New York, 11201, United States.                              | Western Institutional Review Board, 1019 39th Avenue SE, Puyallup, Washington, 98374, United States.                     |
| St. Joseph Hospital Comprehensive Research Institute, Suite 2E, 620 10th Street North, St. Petersburg, Florida, 33705, United States | Copernicus Group, Suite 200, 5000 Centregreen Way, Cary, North Carolina, 27513, United States                            |
| East Bay Rheumatology Medical Group, 13851 East 14th Street, San Leandro, California, 94578, United States                           | Copernicus Group Institutional Review Board, Suite 200, 5000 Centregreen Way, Cary, North Carolina, 27513, United States |



|                                                                                                                                               |                                                                                                                                                               |
|-----------------------------------------------------------------------------------------------------------------------------------------------|---------------------------------------------------------------------------------------------------------------------------------------------------------------|
| Carolina Arthritis Associates, 1710 S. 17th St.,<br>Wilmington, North Carolina, 28401, United<br>States                                       | Copernicus Group, Suite 200, 5000<br>Centregreen Way, Cary, North Carolina, 27513,<br>United States.                                                          |
| Sierra Rheumatology, Suite 295, 151 N. Sunrise<br>Boulevard., Roseville, California, 95661, United<br>States                                  | Copernicus Group Institutional Review Board,<br>Suite 200,<br>5000 Centregreen Way Cary, North Carolina,<br>27513, United States                              |
| La Salud Research Clinic, Suite 203, 8415<br>Southwest 24th Street, Miami, Florida, 33155,<br>United States                                   | Copernicus Group, Suite 200, 5000<br>Centregreen Way, Cary, North Carolina, 27513,<br>United States.                                                          |
| Klein & Associates, M.D., PA, 346 Mill Street,<br>Hagerstown, Maryland, 21740, United States                                                  | Copernicus Group IRB, 5000 CentreGreen Way,<br>Suite 200, Cary, North Carolina, 27513, United<br>States                                                       |
| Arizona Arthritis & Rheumatology Research,<br>PLLC, Suite 108, 399 S. Malpais Ln, Flagstaff,<br>Arizona, 86001, United States.                | Copernicus Group, Suite 200, 5000<br>Centregreen Way, Cary, North Carolina, 27513,<br>United States.                                                          |
| Medical Research Center of Miami II, Inc., Suite<br>209, 3971 SW 8TH Street, Miami, Florida,<br>33134, United States.                         | Copernicus Group, Suite 200, 5000<br>Centregreen Way, Cary, North Carolina, 27513,<br>United States.                                                          |
| Clinical and Translational Research Center of<br>Alabama, PC, Suite 112, 4280 Watermelon<br>Road, Northport, Alabama, 35473, United<br>States | Copernicus Group, Suite 200, 5000<br>Centregreen Way, Cary, North Carolina, 27513,<br>United States.                                                          |
| June DO. PC, Suite-200, 4052 Legacy Parkway,<br>Lansing, Michigan, 48910, United States.                                                      | Copernicus Group, Suite 200, 5000<br>Centregreen Way, Cary, North Carolina, 27513,<br>United States.                                                          |
| Kadlec Clinic Rheumatology, 6710 W.<br>Okanogan Place, Kennewick, Washington,<br>99336, United States                                         | Copernicus Group Institutional Review Board,<br>Suite 200,<br>5000 Centregreen Way Cary,<br>North Carolina, 27513, United States                              |
| Harbor-UCLA Medical Center, Bld J4, 1124<br>West Carson Street, Torrance, California,<br>90502, United States                                 | Western Institutional Review Board-Copernicus<br>Group incorporated, Suite 120, 1019 39th<br>Avenue. S.E, Puyallup, Washington, 98374-<br>2115, United States |
| AA MRC LLC, Suite D, 8200 South Saginaw<br>Street, Grand Blanc, Michigan, 48439, United<br>States                                             | Copernicus Group IRB, 5000 CentreGreen Way,<br>Suite 200, Cary, North Carolina, 27513, United<br>States                                                       |
| Accurate Clinical Management, LLC., 2222<br>Greenhouse Road, Houston, Texas, 77084,<br>United States                                          | Copernicus Group, Suite 200, 5000<br>Centregreen Way, Cary, North Carolina, 27513,<br>United States.                                                          |
| Altoona Center for Clinical Research, 175<br>Meadowbrook Lane, Duncansville,<br>Pennsylvania, 16635, United States.                           | Copernicus Group, Suite 200, 5000<br>Centregreen Way, Cary, North Carolina, 27513,<br>United States.                                                          |
| University of Arizona, 1501 North Campbell<br>Avenue, Tucson, Arizona, 85724, United States                                                   | Copernicus Group Institutional Review Board,<br>Suite 200, 5000 Centregreen Way, Cary, North<br>Carolina, 27513, United States                                |
| Carolina Health Specialists, Ste. 4, 945 82nd<br>Parkway, Myrtle Beach, South Carolina, 29572,<br>United States                               | Copernicus Group, Suite 200, 5000<br>Centregreen Way, Cary, North Carolina, 27513,<br>United States.                                                          |
| Clinical Research of West Florida, 2147 NE<br>Coachman Road, Clearwater, Florida, 33765,<br>United States                                     | Copernicus Group, Suite 200, 5000<br>Centregreen Way, Cary, North Carolina, 27513,<br>United States.                                                          |
| Ochsner Health Center - Baton Rouge, 9001<br>Summa Ave., Baton Rouge, Louisiana, 70809,<br>United States                                      | Ochsner Clinic Foundation Institutional Review<br>Board, 1514 Jefferson Highway, BH 334, New<br>Orleans, Louisiana, 70121, United States                      |
| SIMEDHealth, LLC, Suite 17., 4343 West<br>Newberry Road, Gainesville, Florida, 32607,<br>United States                                        | Copernicus Group, Suite 200, 5000<br>Centregreen Way, Cary, North Carolina, 27513,<br>United States.                                                          |

|                                                                                                                                                 |                                                                                                                                                     |
|-------------------------------------------------------------------------------------------------------------------------------------------------|-----------------------------------------------------------------------------------------------------------------------------------------------------|
| Clinical Research of West Florida, Inc., 605 N. Howard Avenue, Tampa, Florida, 33606, United States                                             | Copernicus Group, Suite 200, 5000 Centregreen Way, Cary, North Carolina, 27513, United States.                                                      |
| Piedmont Healthcare, Inc, Suite 500, 1800 Howell Mill Road, Atlanta, Georgia, 30318, United States                                              | Western Institutional Review Board-Copernicus Group incorporated, Suite 120, 1019 39th Avenue. S.E, Puyallup, Washington, 98374-2115, United States |
| The Arthritis & Diabetes Clinic, Incorporated., 3402 Magnolia Cove, Monroe, Louisiana, 71203, United States                                     | Copernicus Group IRB, 5000 CentreGreen Way, Suite 200, Cary, North Carolina, 27513, United States                                                   |
| The Center for Rheumatology and Bone Research, Suite 306, 2730 University Boulevard West, Wheaton, Maryland, 20902, United States               | WIRB Copernicus Group, Suite 301, 212 Carnegie Center, Princeton, New Jersey, 08540, United States                                                  |
| Henry Ford Medical Center, New Center One, Department of Dermatology, Suite 800, 3031 West Grand Blvd, Detroit, Michigan, 48202, United States. | Western Institutional Review Board, 1019 39th Avenue SE, Puyallup, Washington, 98374, United States.                                                |
| St. Paul Rheumatology, P.A., 2854 Highway 55, Eagan, Minnesota, 55121, United States                                                            | Copernicus Group, Suite 200, 5000 Centregreen Way, Cary, North Carolina, 27513, United States.                                                      |
| Articularis Healthcare Group Inc. d/b/a Low Country Rheumatology, Suite 201, 2001 2nd Avenue, Summerville, South Carolina, 29486, United States | Copernicus Group IRB, 5000 CentreGreen Way, Suite 200, Cary, North Carolina, 27513, United States                                                   |
| Rheumatic Disease Center, 7080 N. Port Washington Rd, Glendale, Wisconsin, 53217, United States.                                                | Copernicus Group, Suite 200, 5000 Centregreen Way, Cary, North Carolina, 27513, United States.                                                      |
| Albuquerque Center For Rheumatology, 1617 University Boulevard NE, Albuquerque, New Mexico, 87102, United States                                | Copernicus Group Institutional Review Board, Suite 200, 5000 Centregreen Way, Cary, North Carolina, 27513, United States                            |
| Four Rivers Clinical Research, Inc., Suite 305, 225 Medical Center Drive, Paducah, Kentucky, 42003, United States                               | Copernicus Group, Suite 200, 5000 Centregreen Way, Cary, North Carolina, 27513, United States.                                                      |
| Tekton Research Inc, 4534 West Gate Blvd, Suite 110, Austin, Texas, 78745, United States                                                        | Copernicus Group IRB, 5000 CentreGreen Way, Suite 200, Cary, North Carolina, 27513, United States                                                   |
| Adriana Pop Moody Clinic PA, Suite 704, 613 Elizabeth Street, Corpus Christi, Texas, 78404, United States                                       | Copernicus Group IRB, 5000 CentreGreen Way, Suite 200, Cary, North Carolina, 27513, United States                                                   |
| Marietta Rheumatology, 670 North Ave # A, Marietta, Georgia, 30060, United States                                                               | Copernicus Group, Suite 200, 5000 Centregreen Way, Cary, North Carolina, 27513, United States.                                                      |
| ACRC Studies, Suite 108, 15725 Pomerado Road, Poway, California, 92064, United States.                                                          | Copernicus Group, Suite 200, 5000 Centregreen Way, Cary, North Carolina, 27513, United States.                                                      |
| Rheumatology Clinic of Houston, P.A., Suite 240, 11307 FM 1960 West, Houston, Texas, 77065, United States                                       | Copernicus Group, Suite 200, 5000 Centregreen Way, Cary, North Carolina, 27513, United States.                                                      |
| Tekton Research, 3rd Floor, 9600 Broadway, Oklahoma City, Oklahoma, 73114, United States.                                                       | Copernicus Group, Suite 200, 5000 Centregreen Way, Cary, North Carolina, 27513, United States.                                                      |
| American Research Institute, Inc., Suite B110, 18951 SW 106th Avenue, Cutler Bay, Florida, 33157, United States.                                | Copernicus Group, Suite 200, 5000 Centregreen Way, Cary, North Carolina, 27513, United States.                                                      |
| Clinical Research Center of CT/NY, Suite 206, 27 Hospital Drive, Danbury, Connecticut, 6810, United States                                      | Copernicus Group, Suite 200, 5000 Centregreen Way, Cary, North Carolina, 27513, United States.                                                      |

|                                                                                                                            |                                                                                                                               |
|----------------------------------------------------------------------------------------------------------------------------|-------------------------------------------------------------------------------------------------------------------------------|
| Innovation Medical Research Center, Inc, 9299 SW 152nd Street, Palmetto Bay, Florida, 33157, United States.                | Copernicus Group, Suite 200, 5000 Centregreen Way, Cary, North Carolina, 27513, United States.                                |
| Novi Research, 39500 W 10 Mile Road Ste 101, Novi, Michigan, 48375, United States                                          | Copernicus Group Institutional Review Board, Suite 200, 5000 Centregreen Way Cary, North Carolina, 27513, United States       |
| Institute of Arthritis Research, 2220 E 25th Steet, Idaho Falls, Idaho, 83404, United States.                              | Copernicus Group, Suite 200, 5000 Centregreen Way, Cary, North Carolina, 27513, United States.                                |
| Sweet Hope Research Specialty, Inc., 14160 Palmetto Frontage Rd, Miami Lakes, Florida, 33016, United States                | Copernicus Group, Suite 200, 5000 Centregreen Way, Cary, North Carolina, 27513, United States.                                |
| Life Clinical Trials, 5901 Colonial Drive, Suite 303, Margate, Florida, 33063, United States.                              | Copernicus Group, Suite 200, 5000 Centregreen Way, Cary, North Carolina, 27513, United States.                                |
| Heartland Research Associates an AMR Company, 1709 S Rock Rd, Wichita, Kansas, 67207, United States.                       | Copernicus Group, Suite 200, 5000 Centregreen Way, Cary, North Carolina, 27513, United States.                                |
| Allegheny Health Network, 4800 Friendship Avenue, Pittsburgh, Pennsylvania, 15224, United States.                          | Western Institution Review Board, 1019 39 <sup>th</sup> Avenue SE, Puyallup, Washington, 98374, United States.                |
| Qualmedica Research, LLC, 4933 Plaza East Boulevard, Evansville, Indiana, 47715, United States                             | Copernicus Group Independent Review Board (CGIRB), 1019 39th Avenue SE, Suite 120, Puyallup, Washington, 98374, United States |
| Arizona Arthritis & Rheumatology Research, PLLC, B100, 10615 West Thunderbird Blvd, SunCity, Arizona, 85351, United States | Copernicus Group, Suite 200, 5000 Centregreen Way, Cary, North Carolina, 27513, United States.                                |
| West Broward Rheumatology Associates, Inc., Suite 300, 7431 North University Drive, Tamarac, Florida, 33321, United States | Copernicus Group Institutional Review Board, Suite 200, 5000 Centregreen Way, Cary, North Carolina, 27513, United States      |
| Medication Management LLC, Suite 106, 802 Green Valley Road, Greensboro, North Carolina, 27408, United States              | Copernicus Group Independent Review Board (CGIRB), 1019 39th Avenue SE, Suite 120, Puyallup, Washington, 98374, United States |
| Arizona Arthritis & Rheumatology Research, PLLC, B100, 10615 West Thunderbird Blvd, SunCity, Arizona, 85351, United States | Copernicus Group IRB, 5000 CentreGreen Way, Suite 200, Cary, North Carolina, 27513, United States                             |
| Tekton Research Inc., Suite 361, 2121 East Harmony Road, Fort Collins, Colorado, 80528, United States                      | Copernicus Group Institutional Review Board, Suite 200, 5000 Centregreen Way Cary, North Carolina, 27513, United States       |
| The Center for Rheumatology, LLP, 8 <sup>th</sup> Floor, 4 Tower Place, Albany, New York, 12203, United States             | Copernicus Group, Suite 200, 5000 Centregreen Way, Cary, North Carolina, 27513, United States.                                |
| DMI Research, 6699 90 <sup>th</sup> Avenue N, Pinellas Park, Florida, 33782, United States                                 | Copernicus Group, Suite 200, 5000 Centregreen Way, Cary, North Carolina, 27513, United States.                                |
| Better Health Clinical Research, Suite 100, 1665 Highway 34 East, Newnan, Georgia, 30265, United States                    | Copernicus Group Institutional Review Board, Suite 200, 5000 Centregreen Way Cary, North Carolina, 27513, United States       |
| West Texas Clinical Research, Suite 2C, 3809 22nd Street, Lubbock, Texas, 79410, United States                             | Copernicus Group Independent Review Board (CGIRB), 1019 39th Avenue SE, Suite 120, Puyallup, Washington, 98374, United States |
| Clinical Research Center of Reading LLP, 2760 Century Boulevard, Wyomissing, Pennsylvania, 19610, United States            | Copernicus Group, Suite 200, 5000 Centregreen Way, Cary, North Carolina, 27513, United States.                                |

|                                                                                                                              |                                                                                                                               |
|------------------------------------------------------------------------------------------------------------------------------|-------------------------------------------------------------------------------------------------------------------------------|
| Accurate Clinical Research, Inc., Suite 102, 11003 Resource Parkway, Houston, Texas, 77089, United States                    | Copernicus Group, Suite 200, 5000 Centregreen Way, Cary, North Carolina, 27513, United States.                                |
| Rheumatology Consultants PLLC, Suite 200, Colony Park, 4707 Papermill Drive, Knoxville, Tennessee, 37909-1907, United States | Copernicus Group Independent Review Board (CGIRB), 1019 39th Avenue SE, Suite 120, Puyallup, Washington, 98374, United States |
| Medvin Clinical Research, Suite 306, 15243 Vanowen Street, Van Nuys, California, 91405, United States                        | Copernicus Group, Suite 200, 5000 Centregreen Way, Cary, North Carolina, 27513, United States.                                |
| Suncoast Clinical Research, Inc., 5604 Gulf Drive, New Port Richey, Florida, 34652, United States                            | Copernicus Group, Suite 200, 5000 Centregreen Way, Cary, North Carolina, 27513, United States.                                |
| Oklahoma Center for Arthritis Therapy & Research, Inc., 1430 Terrace Drive, Tulsa, Oklahoma, 74104, United States            | Copernicus Group Institutional Review Board, Suite 200, 5000 Centregreen Way, Cary, North Carolina, 27513, United States      |
| DMI Research, 6699 90th Avenue N, Pinellas Park, Florida, 33782, United States.                                              | Copernicus Group, Suite 200, 5000 Centregreen Way, Cary, North Carolina, 27513, United States.                                |

All centres participated in the study under the US IND

IEC, Independent Ethics Committee; IND, Investigational New Drug; IRB, Institutional Review Board.

**Supplementary Table 2.** Permitted medications in contrRAst 1 and contrRAst 2

| Medications/Treatments                                                                                                                                                                                                                                                                                                                                                                                     | Restriction                                                                                                                                     |                                                                            |                         |
|------------------------------------------------------------------------------------------------------------------------------------------------------------------------------------------------------------------------------------------------------------------------------------------------------------------------------------------------------------------------------------------------------------|-------------------------------------------------------------------------------------------------------------------------------------------------|----------------------------------------------------------------------------|-------------------------|
|                                                                                                                                                                                                                                                                                                                                                                                                            | Prior to study treatment period                                                                                                                 | During study treatment period<br>(Day 1 to Week 52)                        | During 8-week follow-up |
| <b>Conventional synthetic DMARDs</b>                                                                                                                                                                                                                                                                                                                                                                       |                                                                                                                                                 |                                                                            |                         |
| <b>ContRAst 1</b>                                                                                                                                                                                                                                                                                                                                                                                          |                                                                                                                                                 |                                                                            |                         |
| Methotrexate* 15-25mg/week oral or injected.<br>A lower dose of $\geq 7.5$ mg/week is acceptable if reduced for reasons of intolerance to MTX. e.g. hepatic or hematologic toxicity, or per local requirement (this must be clearly documented in medical records).<br>Exception: A lower dose of 6 mg/week is only allowed if the minimum locally approved or recommended dose is lower than 7.5 mg/week. | Required<br>(must have received at least 12 weeks treatment prior to Day 1, with stable and tolerated dose for at least 8 weeks prior to Day 1) | Required<br>(dose must remain stable except adjustment for safety reasons) | Permitted               |
| <b>Conventional synthetic DMARDs</b>                                                                                                                                                                                                                                                                                                                                                                       |                                                                                                                                                 |                                                                            |                         |
| <b>ContRAst 2</b>                                                                                                                                                                                                                                                                                                                                                                                          |                                                                                                                                                 |                                                                            |                         |
| <i>Patients must currently be taking at least one and at most two of the following concomitant csDMARDs</i>                                                                                                                                                                                                                                                                                                |                                                                                                                                                 |                                                                            |                         |

|                                                                                                                                                                                                                                                                                                                                                                                                                                      |                                                                                                                                                                                  |                                                                                                             |                  |
|--------------------------------------------------------------------------------------------------------------------------------------------------------------------------------------------------------------------------------------------------------------------------------------------------------------------------------------------------------------------------------------------------------------------------------------|----------------------------------------------------------------------------------------------------------------------------------------------------------------------------------|-------------------------------------------------------------------------------------------------------------|------------------|
| <p>Methotrexate* 15-25mg/week oral or injected.</p> <p>A lower dose of <math>\geq 7.5</math> mg/week is acceptable if reduced for reasons of intolerance to MTX. e.g. hepatic or hematologic toxicity, or per local requirement (this must be clearly documented in medical records).</p> <p>Exception: A lower dose of 6 mg/week is only allowed if the minimum locally approved or recommended dose is lower than 7.5 mg/week.</p> | <p>At least one and at most two required (must have received at least 12 weeks treatment prior to Day 1, with stable and tolerated dose for at least 8 weeks prior to Day 1)</p> | <p>At least one and at most two required (dose must remain stable except adjustment for safety reasons)</p> | <p>Permitted</p> |
| Hydroxychloroquine up to 400 mg/day                                                                                                                                                                                                                                                                                                                                                                                                  |                                                                                                                                                                                  |                                                                                                             |                  |
| Chloroquine up to 250 mg/day                                                                                                                                                                                                                                                                                                                                                                                                         |                                                                                                                                                                                  |                                                                                                             |                  |
| Sulfasalazine up to 3000 mg/day                                                                                                                                                                                                                                                                                                                                                                                                      |                                                                                                                                                                                  |                                                                                                             |                  |
| Leflunomide up to 20 mg/day                                                                                                                                                                                                                                                                                                                                                                                                          |                                                                                                                                                                                  |                                                                                                             |                  |
| Bucillamine up to 100 mg/day (or up to 300 mg/day if permitted per local requirements)                                                                                                                                                                                                                                                                                                                                               |                                                                                                                                                                                  |                                                                                                             |                  |
| Iguratimod up to 50 mg/day                                                                                                                                                                                                                                                                                                                                                                                                           |                                                                                                                                                                                  |                                                                                                             |                  |
| <b>Corticosteroids*</b>                                                                                                                                                                                                                                                                                                                                                                                                              |                                                                                                                                                                                  |                                                                                                             |                  |
| <p>Stable dosing regimen of oral corticosteroids <math>\leq 10</math> mg/day prednisolone or equivalent.</p>                                                                                                                                                                                                                                                                                                                         | <p>Permitted</p> <p>(dose must be stable 4 weeks prior to Day 1 and during screening if longer, with no changes except for safety reasons)</p>                                   | <p>Permitted</p> <p>(dose must remain stable except for safety reasons)</p>                                 | <p>Permitted</p> |
| <p>Intra-articular corticosteroids</p>                                                                                                                                                                                                                                                                                                                                                                                               | <p>Prohibited within 4 weeks prior to Day 1 and during screening, if longer.</p>                                                                                                 | <p>Permitted after Week 12</p> <p>(Post week 12, the number of IA steroid injections should be</p>          | <p>Permitted</p> |

|                                                                                                                                                                                                                                   |                                                                                                                                                                                                                                                                                                                                                                                     |                                                                                                                                                                                                                                                                                                                                                                                                                                                          |           |
|-----------------------------------------------------------------------------------------------------------------------------------------------------------------------------------------------------------------------------------|-------------------------------------------------------------------------------------------------------------------------------------------------------------------------------------------------------------------------------------------------------------------------------------------------------------------------------------------------------------------------------------|----------------------------------------------------------------------------------------------------------------------------------------------------------------------------------------------------------------------------------------------------------------------------------------------------------------------------------------------------------------------------------------------------------------------------------------------------------|-----------|
|                                                                                                                                                                                                                                   |                                                                                                                                                                                                                                                                                                                                                                                     | limited to 2 injections through Week 52, administration should not occur during the 4 weeks prior to Week 24 or Week 52. The site(s) of injection must be recorded)                                                                                                                                                                                                                                                                                      |           |
| Inhaled steroids, topical steroids or topical immunosuppressive agents (e.g., eye drops, creams)                                                                                                                                  | Permitted                                                                                                                                                                                                                                                                                                                                                                           | Permitted                                                                                                                                                                                                                                                                                                                                                                                                                                                | Permitted |
| <b>Analgesics</b>                                                                                                                                                                                                                 |                                                                                                                                                                                                                                                                                                                                                                                     |                                                                                                                                                                                                                                                                                                                                                                                                                                                          |           |
| Acetaminophen (paracetamol) <b>taken as rescue for RA pain:</b> up to a maximum of 4g/day or locally approved maximum (if lower).                                                                                                 | Permitted as needed (but not within 24 hours of Day 1 baseline visit)                                                                                                                                                                                                                                                                                                               | Permitted as needed (but not within 24 hours of assessment visits)                                                                                                                                                                                                                                                                                                                                                                                       | Permitted |
| NSAIDs including aspirin and selective cyclooxygenase inhibitors.<br><br><i>In this study, aspirin is considered a NSAID, except for low-doses (e.g. 75-150 mg/day) prescribed for cardiovascular or cerebrovascular disease.</i> | Permitted<br><br><b>Patients on regular doses:</b> <u>Dosing regimen must be stable 7 days prior to Day 1</u> , no changes except for safety reasons.<br>Do not discontinue in advance of visits.<br><br><b>Patients on PRN prescription:</b> Record each dose during screening, or frequency with start/end dates, in CRF. Should not be taken within 24h of Day 1 baseline visit. | Permitted<br><br><b>Patients on stable, regular doses:</b> From Day 1 to Week 12, dose regimen must not change except for safety reasons. Do not discontinue in advance of visits. After Week 12, any new analgesic or change in regimen should not occur within 24h of assessment visits.<br><br><b>Patients on PRN prescription:</b> Record each dose, or frequency with start/end dates, in CRF. Should not be taken within 24h of assessment visits. | Permitted |

|                                                                                                                  |                                                                                                                                                                                                                                                                                                                                                                                                      |                                                                                                                                                                                                                                                                                                                                                                                                                                                                               |           |
|------------------------------------------------------------------------------------------------------------------|------------------------------------------------------------------------------------------------------------------------------------------------------------------------------------------------------------------------------------------------------------------------------------------------------------------------------------------------------------------------------------------------------|-------------------------------------------------------------------------------------------------------------------------------------------------------------------------------------------------------------------------------------------------------------------------------------------------------------------------------------------------------------------------------------------------------------------------------------------------------------------------------|-----------|
| Weak opioid analgesics (e.g. tramadol up to 400 mg/day, codeine)                                                 | <p>Permitted</p> <p><b>Patients on regular doses:</b> <u>Dosing regimen must be stable 7 days prior to Day 1</u>, no changes except for safety reasons.</p> <p>Do not discontinue in advance of visits.</p> <p><b>Patients on PRN prescription:</b></p> <p>Record each dose during screening, or frequency with start/end dates, in CRF. Should not be taken within 24h of Day 1 baseline visit.</p> | <p>Permitted</p> <p><b>Patients on stable, regular doses:</b> From Day 1 to Week 12, dose regimen must not change except for safety reasons.</p> <p>Do not discontinue in advance of visits.</p> <p>After Week 12, any new analgesic or change in regimen should not occur within 24h of assessment visits.</p> <p><b>Patients on PRN prescription:</b> Record each dose, or frequency with start/end dates, in CRF. Should not be taken within 24h of assessment visits.</p> | Permitted |
| Strong opioid analgesics (e.g. morphine, hydromorphone, oxycodone, hydrocodone, fentanyl, meperidine, methadone) | Prohibited within 4 weeks prior to Day 1 and during screening, if longer.                                                                                                                                                                                                                                                                                                                            | <p>Permitted after Week 12</p> <p>After week 12, PRN or regular doses may be considered, but any new analgesic or change in regimen should not occur within 24h of assessment visits.</p> <p><b>Patients on PRN prescription:</b> Record each dose, or frequency with start/end dates, in CRF. Should not be taken within 24h of assessment visits.</p>                                                                                                                       | Permitted |
| <b>Other Medications</b>                                                                                         |                                                                                                                                                                                                                                                                                                                                                                                                      |                                                                                                                                                                                                                                                                                                                                                                                                                                                                               |           |



|                                                                                                          |                                                                           |                                                                              |           |
|----------------------------------------------------------------------------------------------------------|---------------------------------------------------------------------------|------------------------------------------------------------------------------|-----------|
| Intra-articular Hyaluronic acid and any other intra-articular compounds used as lubricant in the joints. | Prohibited within 2 weeks prior to Day 1 and during screening, if longer. | Prohibited within 2 weeks prior to Week 12, Week 24 and Week 52 assessments. | Permitted |
|----------------------------------------------------------------------------------------------------------|---------------------------------------------------------------------------|------------------------------------------------------------------------------|-----------|

Restrictions apply to both contrASt 1 and contrASt 2 unless otherwise stated.

\*Prior to any dose changes in MTX or oral corticosteroids, it was recommended that the Investigator contact the medical monitor to discuss and agree on the dose change.

CRF, case report form; csDMARD, conventional synthetic disease-modifying anti-rheumatic drug; MTX, methotrexate; NSAID, non-steroidal anti-inflammatory drug; PRN, pro re nata (as needed); RA, rheumatoid arthritis.

**Supplementary Table 3.** Prohibited medications/treatments in contRAst 1 and contRAst 2

| Medications/Treatments                                                                                                              | Restriction                                                                                 |                                                  |                         |
|-------------------------------------------------------------------------------------------------------------------------------------|---------------------------------------------------------------------------------------------|--------------------------------------------------|-------------------------|
|                                                                                                                                     | Prior to study treatment period                                                             | During study treatment period (Day 1 to Week 52) | During 8-week follow-up |
| <b>Treatments affecting GM-CSF pathway</b>                                                                                          |                                                                                             |                                                  |                         |
| Any treatment antagonising GM-CSF or its receptor                                                                                   | Prohibited (Exclusion criterion)                                                            | Prohibited (Except study intervention)           | Prohibited              |
| <b>Conventional synthetic DMARDs</b>                                                                                                |                                                                                             |                                                  |                         |
| <i>ContRAst 1</i><br>Hydroxychloroquine, chloroquine, sulfasalazine, minocycline, cyclosporin, bucillamine, iguratimod              | Discontinue at least 4 weeks prior to Day 1                                                 | Prohibited                                       | No restriction          |
| <i>ContRAst 2</i><br>Hydroxychloroquine, chloroquine, sulfasalazine, minocycline, cyclosporin, bucillamine, iguratimod              | Discontinue at least 4 weeks prior to Day 1 if not being continued as background medication | Prohibited                                       | No restriction          |
| <i>ContRAst 1</i><br>Tacrolimus                                                                                                     | Discontinue at least 4 weeks prior to Day 1                                                 | Prohibited                                       | No restriction          |
| <i>ContRAst 2</i><br>Tacrolimus<br>Not permitted as background medication                                                           | Discontinue at least 4 weeks prior to Day 1                                                 | Prohibited                                       | No restriction          |
| Azathioprine                                                                                                                        | Discontinue at least 4 weeks prior to Day 1                                                 | Prohibited                                       | No restriction          |
| Leflunomide without washout treatment                                                                                               | Discontinue at least 12 weeks prior to Day 1                                                | Prohibited                                       | No restriction          |
| Leflunomide with washout treatment for 11 days with oral cholestyramine (8 g three times daily) or charcoal (50 g four times daily) | Washout treatment must complete at least 2 weeks prior to Day 1                             | Prohibited                                       | No restriction          |
| <i>ContRAst 1</i><br>Other csDMARDs                                                                                                 | Discontinue at least 4 weeks prior to Day 1                                                 | Prohibited                                       | No restriction          |

|                                                                                                                                                                 |                                                                                   |                                           |                |
|-----------------------------------------------------------------------------------------------------------------------------------------------------------------|-----------------------------------------------------------------------------------|-------------------------------------------|----------------|
| <i>ContRAst 2</i><br>Other csDMARDs<br>If not being continued as background medication                                                                          | Discontinue at least 4 weeks prior to Day 1                                       | Prohibited                                | No restriction |
| <b>Biologic DMARDs</b><br>In <i>contRAst 1</i> : the number of patients with prior bDMARD exposure will be limited to approximately 20% of overall sample size. |                                                                                   |                                           |                |
| Etanercept (including its biosimilars).<br>( <i>ContRAst 1</i> : Only if discontinued for reasons <i>other than</i> inadequate response*)                       | Discontinue at least 4 weeks prior to Day 1                                       | Prohibited                                | Prohibited     |
| Any cell-depleting therapies, e.g., anti-CD20.<br>( <i>ContRAst 1</i> : Only if discontinued for reasons <i>other than</i> inadequate response*)                | Discontinue at least 52 weeks prior to Day 1                                      | Prohibited                                | Prohibited     |
| <i>ContRAst 1</i><br>Any other bDMARDs (experimental or approved) discontinued for reasons <i>other than</i> inadequate response*                               | Discontinue at least 8 weeks prior to Day 1                                       | Prohibited                                | Prohibited     |
| <i>ContRAst 1</i><br>Any bDMARD (experimental or approved) that was discontinued <i>due to</i> inadequate response*                                             | Prohibited<br>(Exclusion criterion)                                               | Prohibited                                | Prohibited     |
| <i>ContRAst 2</i><br>Any other bDMARDs (experimental or approved)                                                                                               | Discontinue at least 8 weeks prior to Day 1                                       | Prohibited                                | Prohibited     |
| <b>Targeted synthetic DMARDs</b>                                                                                                                                |                                                                                   |                                           |                |
| JAK inhibitors (experimental or approved; e.g., tofacitinib, baricitinib, upadacitinib, filgotinib and peficitinib)                                             | Prohibited<br>(Exclusion criterion)                                               | Prohibited<br>(Except study intervention) | Prohibited     |
| Other (non-JAK inhibitor) tsDMARD (experimental or approved)                                                                                                    | Discontinue at least 4 weeks or 5 half-lives (whichever is longer) prior to Day 1 | Prohibited                                | Prohibited     |
| <b>Other RA therapies</b>                                                                                                                                       |                                                                                   |                                           |                |

|                                                                                                                                                                                                                                                                                                                                                                                                                                                                                                                                                                                                                           |                                                                                              |                                        |                |
|---------------------------------------------------------------------------------------------------------------------------------------------------------------------------------------------------------------------------------------------------------------------------------------------------------------------------------------------------------------------------------------------------------------------------------------------------------------------------------------------------------------------------------------------------------------------------------------------------------------------------|----------------------------------------------------------------------------------------------|----------------------------------------|----------------|
| Plasmapheresis or intravenous immunoglobulin (IVIG) or use of plasma filtering devices (e.g., Staph protein A column – Prosorba)                                                                                                                                                                                                                                                                                                                                                                                                                                                                                          | Discontinue at least 26 weeks prior to Day 1                                                 | Prohibited                             | Prohibited     |
| <b>Corticosteroids</b>                                                                                                                                                                                                                                                                                                                                                                                                                                                                                                                                                                                                    |                                                                                              |                                        |                |
| Dose changes in oral corticosteroids $\leq 10$ mg/day prednisolone or equivalent                                                                                                                                                                                                                                                                                                                                                                                                                                                                                                                                          | Prohibited 4 weeks prior to Day 1, and during screening if longer, except for safety reasons | Prohibited (except for safety reasons) | No restriction |
| Oral corticosteroids $> 10$ mg/day prednisolone or equivalent                                                                                                                                                                                                                                                                                                                                                                                                                                                                                                                                                             | Discontinue or reduce to $\leq 10$ mg/day, at least 4 weeks prior to Day 1                   | Prohibited (except for safety reasons) | No restriction |
| Intra-muscular or intravenous corticosteroids                                                                                                                                                                                                                                                                                                                                                                                                                                                                                                                                                                             | Discontinue at least 4 weeks prior to Day 1, and during screening if longer                  | Prohibited (except for safety reasons) | No restriction |
| <b>Other medications</b>                                                                                                                                                                                                                                                                                                                                                                                                                                                                                                                                                                                                  |                                                                                              |                                        |                |
| Potent inhibitors of cytochrome P450 3A4 (CYP3A4; e.g., ketoconazole).<br>One or more concomitant medications that result in both moderate inhibition of CYP3A4 and potent inhibition of CYP2C19 (e.g., fluconazole).<br>Potent CYP3A4 inducers (e.g., rifampin)                                                                                                                                                                                                                                                                                                                                                          | Refer to SRM for additional guidance                                                         | Prohibited                             | No restriction |
| <b>Vaccine immunisations</b>                                                                                                                                                                                                                                                                                                                                                                                                                                                                                                                                                                                              |                                                                                              |                                        |                |
| Investigators should review and update the vaccination status of potential patients as per local guidelines for adult vaccination prior to entering them into the study; refer to EULAR recommendations <sup>1</sup> where no local guidelines are available, with particular attention to the vaccination status of patients over 65 years of age. All patients who have not received the herpes zoster vaccine at study entry will be recommended to complete vaccination $> 30$ days prior to randomisation. All patients may receive inactivated flu vaccines during the study at the discretion of the investigator. |                                                                                              |                                        |                |
| Live-attenuated vaccinations                                                                                                                                                                                                                                                                                                                                                                                                                                                                                                                                                                                              | Discontinue at least 30 days prior to Day 1                                                  | Prohibited                             | Prohibited     |

|                 |                                              |            |            |
|-----------------|----------------------------------------------|------------|------------|
| BCG vaccination | Discontinue at least 365 days prior to Day 1 | Prohibited | Prohibited |
|-----------------|----------------------------------------------|------------|------------|

Restrictions apply to both contrRAst 1 and contrRAst 2 unless otherwise stated.

\*Inadequate response to treatment is defined as: In the opinion of the investigator, after at least 3 months of treatment, the participant experienced insufficient efficacy or loss of response (e.g., no EULAR response; failure to achieve ACR20; any other clinical criteria recommended per local guidelines that would trigger a change of treatment) or the participant discontinued treatment due to intolerability or toxicity irrespective of treatment duration.

b/cs/tsDMARD, biologic/conventional synthetic/targeted synthetic disease-modifying anti-rheumatic drug; GM-CSF, granulocyte-macrophage colony-stimulating factor; JAK, Janus kinase.

1. Furer V, Rondaan C, Heijstek MW, Agmon-Levin N, van Assen S, Bijl M, et al. 2019 update of EULAR recommendations for vaccination in adult patients with autoimmune inflammatory rheumatic diseases. *Ann Rheum Dis*. 2020;79(1):39-52.

**Supplementary Table 4.** Secondary endpoints at Week 24 in contRAst 1 and contRAst 2

|                                                 | ContRAst 1                      |                                  |                                    | ContRAst 2                      |                                  |                                    |
|-------------------------------------------------|---------------------------------|----------------------------------|------------------------------------|---------------------------------|----------------------------------|------------------------------------|
|                                                 | Otilimab<br>90 mg QW<br>(N=513) | Otilimab<br>150 mg QW<br>(N=510) | Tofacitinib<br>5 mg BID<br>(N=258) | Otilimab<br>90 mg QW<br>(N=545) | Otilimab<br>150 mg QW<br>(N=539) | Tofacitinib<br>5 mg BID<br>(N=271) |
| <b>ACR20</b>                                    |                                 |                                  |                                    |                                 |                                  |                                    |
| Responders, %                                   | 63.9                            | 61.3                             | 74.4                               | 65.0                            | 62.5                             | 79.8                               |
| Difference vs tofacitinib,<br>% (95% CI)        | -10.4 (-17.6, -3.3)             | -13.0 (-20.2, -5.8)              |                                    | -14.7 (-21.3, -8.1)             | -17.2 (-23.9, -10.6)             |                                    |
| OR vs tofacitinib (95%<br>CI)                   | 0.61 (0.43, 0.87)               | 0.55 (0.38, 0.78)                |                                    | 0.46 (0.32, 0.66)               | 0.42 (0.29, 0.60)                |                                    |
| <b>CDAI LDA</b>                                 |                                 |                                  |                                    |                                 |                                  |                                    |
| Responders, %                                   | 29.9                            | 29.8                             | 45.9                               | 32.8                            | 34.3                             | 49.6                               |
| Difference vs tofacitinib,<br>% (95% CI)        | -16.0 (-23.6, -8.4)             | -16.1 (-23.7, -8.5)              |                                    | -16.8 (-24.2, -9.4)             | -15.3 (-22.7, -7.8)              |                                    |
| OR vs tofacitinib (95%<br>CI)                   | 0.50 (0.35, 0.70)               | 0.50 (0.36, 0.70)                |                                    | 0.42 (0.30, 0.59)               | 0.47 (0.34, 0.65)                |                                    |
| <b>HAQ-DI</b>                                   |                                 |                                  |                                    |                                 |                                  |                                    |
| LS mean change (SE)                             | -0.51 (0.027)                   | -0.41 (0.026)                    | -0.56 (0.037)                      | -0.38 (0.033)                   | -0.37 (0.033)                    | -0.53 (0.041)                      |
| LS mean difference<br>from tofacitinib (95% CI) | 0.05 (-0.04, 0.14)              | 0.15 (0.06, 0.24)                |                                    | 0.14 (0.06, 0.23)               | 0.16 (0.08, 0.25)                |                                    |
| <b>Pain VAS</b>                                 |                                 |                                  |                                    |                                 |                                  |                                    |
| LS mean change (SE)                             | -25.43 (1.096)                  | -22.56 (1.069)                   | -31.02 (1.530)                     | -23.32                          | -22.32                           | -31.27                             |

|                                              |                     |                      |                |                      |                      |                |
|----------------------------------------------|---------------------|----------------------|----------------|----------------------|----------------------|----------------|
| LS mean difference from tofacitinib (95% CI) | 5.58 (1.98, 9.19)   | 8.46 (4.85, 12.07)   |                | 7.95 (4.40, 11.50)   | 8.95 (5.39, 12.51)   |                |
| <b>CDAI</b>                                  |                     |                      |                |                      |                      |                |
| LS mean change (SE)                          | -20.63 (0.561)      | -19.88 (0.551)       | -24.50 (0.781) | -20.14 (0.669)       | -20.68 (0.677)       | -24.93 (0.848) |
| LS mean difference from tofacitinib (95% CI) | 3.87 (2.02, 5.72)   | 4.62 (2.77, 6.47)    |                | 4.80 (3.03, 6.56)    | 4.26 (2.48, 6.03)    |                |
| <b>FACIT-Fatigue</b>                         |                     |                      |                |                      |                      |                |
| LS mean change (SE)                          | 8.52 (0.418)        | 7.59 (0.406)         | 8.56 (0.585)   | 6.10 (0.523)         | 6.12 (0.528)         | 8.37 (0.654)   |
| LS mean difference from tofacitinib (95% CI) | -0.04 (-1.42, 1.34) | -0.97 (-2.35, 0.40)  |                | -2.28 (-3.65, -0.90) | -2.25 (-3.63, -0.88) |                |
| <b>CDAI remission</b>                        |                     |                      |                |                      |                      |                |
| Responders, %                                | 6.1                 | 5.2                  | 12.1           | 6.9                  | 7.2                  | 17.9           |
| Difference vs tofacitinib, % (95% CI)        | -6.0 (-10.8, -1.2)  | -6.9 (-11.6, -2.1)   |                | -11.0 (-16.3, -5.7)  | -10.8 (-16.1, -5.4)  |                |
| OR vs tofacitinib (95% CI)                   | 0.48 (0.27, 0.84)   | 0.41 (0.23, 0.74)    |                | 0.31 (0.19, 0.50)    | 0.32 (0.20, 0.53)    |                |
| <b>DAS28-CRP</b>                             |                     |                      |                |                      |                      |                |
| LS mean change (SE)                          | -1.74 (0.056)       | -1.67 (0.055)        | -2.31 (0.078)  | -1.65 (0.070)        | -1.71 (0.071)        | -2.45 (0.089)  |
| LS mean difference from tofacitinib (95% CI) | 0.57 (0.38, 0.75)   | 0.63 (0.45, 0.82)    |                | 0.80 (0.61, 0.98)    | 0.74 (0.56, 0.93)    |                |
| <b>DAS28-CRP ≤3.2</b>                        |                     |                      |                |                      |                      |                |
| Responders, %                                | 26.8                | 29.0                 | 47.4           | 31.3                 | 33.0                 | 55.3           |
| Difference vs tofacitinib, % (95% CI)        | -20.6 (-28.3, 13.0) | -18.4 (-26.1, -10.7) |                | -24.0 (-31.3, -16.7) | -22.3 (-29.6, -14.9) |                |

|                                              |                     |                      |                |                      |                      |                |
|----------------------------------------------|---------------------|----------------------|----------------|----------------------|----------------------|----------------|
| OR vs tofacitinib (95% CI)                   | 0.40 (0.28, 0.57)   | 0.44 (0.31, 0.62)    |                | 0.30 (0.22, 0.42)    | 0.33 (0.23, 0.46)    |                |
| <b>DAS28-CRP &lt;2.6</b>                     |                     |                      |                |                      |                      |                |
| Responders, %                                | 14.5                | 14.1                 | 26.3           | 16.7                 | 19.6                 | 38.0           |
| Difference vs tofacitinib, % (95% CI)        | -11.8 (-18.3, -5.3) | -12.2 (-18.7, -5.7)  |                | -21.4 (-28.2, -14.5) | -18.4 (25.4, -11.5)  |                |
| OR vs tofacitinib (95% CI)                   | 0.48 (0.32, 0.73)   | 0.46 (0.31, 0.69)    |                | 0.27 (0.19, 0.39)    | 0.33 (0.23, 0.48)    |                |
| <b>ACR50</b>                                 |                     |                      |                |                      |                      |                |
| Responders, %                                | 31.4                | 29.1                 | 46.7           | 31.6                 | 32.8                 | 53.6           |
| Difference vs tofacitinib, % (95% CI)        | -15.3 (-22.9, -7.8) | -17.6 (-25.1, -10.1) |                | -22.0 (-29.4, -14.6) | -20.8 (-28.2, -13.4) |                |
| OR vs tofacitinib (95% CI)                   | 0.52 (0.38, 0.72)   | 0.47 (0.34, 0.65)    |                | 0.38 (0.28, 0.52)    | 0.41 (0.30, 0.56)    |                |
| <b>ACR70</b>                                 |                     |                      |                |                      |                      |                |
| Responders, %                                | 12.5                | 10.1                 | 25.1           | 14.0                 | 13.0                 | 28.7           |
| Difference vs tofacitinib, % (95% CI)        | -12.5 (-18.7, -6.3) | -15.0 (-21.1, -8.9)  |                | -14.6 (-20.9, -8.4)  | -15.6 (-21.9, -9.4)  |                |
| OR vs tofacitinib (95% CI)                   | 0.43 (0.29, 0.64)   | 0.34 (0.22, 0.51)    |                | 0.38 (0.27, 0.56)    | 0.36 (0.24, 0.52)    |                |
| <b>Additional ACR core data set measures</b> |                     |                      |                |                      |                      |                |
| <b>TJC68</b>                                 |                     |                      |                |                      |                      |                |
| LS mean change (SE)                          | -13.24 (0.452)      | -12.11 (0.445)       | -15.00 (0.631) | -12.23 (0.561)       | -12.86 (0.571)       | -14.80 (0.706) |
| LS mean difference from tofacitinib (95% CI) | 1.75 (0.26, 3.25)   | 2.88 (1.39, 4.37)    |                | 2.57 (1.10, 4.05)    | 1.94 (0.45, 3.42)    |                |
| <b>SJC66</b>                                 |                     |                      |                |                      |                      |                |



|                                              |                      |                      |                |                      |                      |                |
|----------------------------------------------|----------------------|----------------------|----------------|----------------------|----------------------|----------------|
| LS mean change (SE)                          | -8.96 (0.316)        | -8.50 (0.311)        | -10.70 (0.442) | -8.92 (0.359)        | -9.24 (0.365)        | -10.69 (0.451) |
| LS mean difference from tofacitinib (95% CI) | 1.75 (0.70, 2.79)    | 2.21 (1.16, 3.25)    |                | 1.77 (0.82, 2.71)    | 1.45 (0.50, 2.40)    |                |
| <b>PtGA</b>                                  |                      |                      |                |                      |                      |                |
| LS mean change (SE)                          | -24.87 (1.037)       | -22.43 (1.010)       | -30.24 (1.445) | -22.36 (1.305)       | -21.55 (1.320)       | -30.24 (1.645) |
| LS mean difference from tofacitinib (95% CI) | 5.37 (1.96, 8.77)    | 7.80 (4.40, 11.21)   |                | 7.88 (4.44, 11.32)   | 8.68 (5.24, 12.13)   |                |
| <b>PhGA</b>                                  |                      |                      |                |                      |                      |                |
| LS mean change (SE)                          | -37.50 (0.964)       | -35.72 (0.945)       | -41.45 (1.342) | -34.62 (1.214)       | -35.62 (1.228)       | -40.65 (1.527) |
| LS mean difference from tofacitinib (95% CI) | 3.95 (0.77, 7.12)    | 5.73 (2.56, 8.90)    |                | 6.04 (2.85, 9.22)    | 5.03 (1.84, 8.21)    |                |
| <b>CRP (mg/L)</b>                            |                      |                      |                |                      |                      |                |
| LS mean change (SE)                          | -4.67 (0.857)        | -5.39 (0.836)        | -9.97 (1.194)  | -3.74 (0.980)        | -3.54 (0.998)        | -11.33 (1.225) |
| LS mean difference from tofacitinib (95% CI) | 5.30 (2.49, 8.11)    | 4.59 (1.78, 7.40)    |                | 7.58 (5.03, 10.14)   | 7.79 (5.22, 10.36)   |                |
| <b>Van der Heijde mTSS</b>                   |                      |                      |                |                      |                      |                |
| LS mean change (SE)                          | 0.25 (0.080)         | 0.38 (0.078)         | 0.20 (0.112)   | 0.42 (0.092)         | 0.32 (0.094)         | 0.15 (0.115)   |
| LS mean difference from tofacitinib (95% CI) | 0.05 (-0.21, 0.31)   | 0.18 (-0.08, 0.44)   |                | 0.26 (0.03, 0.50)    | 0.17 (-0.07, 0.41)   |                |
| <b>HRQoL</b>                                 |                      |                      |                |                      |                      |                |
| <b>SF-36 PCS</b>                             |                      |                      |                |                      |                      |                |
| LS mean change (SE)                          | 6.26 (0.319)         | 5.82 (0.313)         | 8.07 (0.448)   | 5.42 (0.416)         | 5.24 (0.421)         | 7.33 (0.520)   |
| LS mean difference from tofacitinib (95% CI) | -1.80 (-2.86, -0.75) | -2.25 (-3.31, -1.19) |                | -1.91 (-3.00, -0.82) | -2.09 (-3.18, -1.00) |                |
| <b>SF-36 MCS</b>                             |                      |                      |                |                      |                      |                |
| LS mean change (SE)                          | 3.69 (0.401)         | 3.87 (0.393)         | 2.92 (0.563)   | 2.69 (0.522)         | 3.16 (0.528)         | 4.80 (0.652)   |

|                                              |                    |                    |  |                      |                      |  |
|----------------------------------------------|--------------------|--------------------|--|----------------------|----------------------|--|
| LS mean difference from tofacitinib (95% CI) | 0.77 (-0.55, 2.10) | 0.96 (-0.37, 2.29) |  | -2.11 (-3.48, -0.74) | -1.64 (-3.02, -0.27) |  |
|----------------------------------------------|--------------------|--------------------|--|----------------------|----------------------|--|

ACR, American College of Rheumatology; BID, twice daily; CDAI, clinical disease activity index; CI, confidence interval; CRP, C-reactive protein; DAS28, disease activity score-28 joints; FACIT, Functional Assessment of Chronic Illness Therapy; HAQ-DI, Health Assessment Questionnaire-Disability Index; LDA, low disease activity; LS, least squares; MCS, mental component summary; mTSS, modified total Sharp scale; OR, odds ratio; PCS, physical component summary; PhGA, physician's global assessment; PtGA, patient's global assessment; HRQoL, health-related quality of life; SE, standard error; SF-36, Short Form-36; SJC, swollen joint count; TJC, tender joint count; QW, once weekly; VAS, visual analogue scale.

**Supplementary Table 5.** Additional secondary endpoints at Week 12 in contRAst 1 and 2

|                                          | ContRAst 1             |                           |                            |                              | ContRAst 2             |                           |                            |                              |
|------------------------------------------|------------------------|---------------------------|----------------------------|------------------------------|------------------------|---------------------------|----------------------------|------------------------------|
|                                          | Pooled placebo (N=256) | Otilimab 90 mg QW (N=513) | Otilimab 150 mg QW (N=510) | Tofacitinib 5 mg BID (N=258) | Pooled placebo (N=270) | Otilimab 90 mg QW (N=545) | Otilimab 150 mg QW (N=539) | Tofacitinib 5 mg BID (N=271) |
| <b>CDAI remission</b>                    |                        |                           |                            |                              |                        |                           |                            |                              |
| Responders, %                            | 1.0                    | 3.8                       | 2.4                        | 5.8                          | 3.8                    | 4.7                       | 4.5                        | 9.7                          |
| Difference vs placebo, % (95% CI)        |                        | 2.8<br>(0.5, 5.2)         | 1.4<br>(-0.5, 3.3)         | 4.8<br>(1.3, 8.3)            |                        | 0.9<br>(-2.2, 4.1)        | 0.6<br>(-2.5, 3.8)         | 5.8<br>(1.3, 10.3)           |
| OR vs placebo (95% CI)                   |                        | 4.18<br>(0.97, 18.10)     | 2.67<br>(0.58, 12.24)      | 6.28<br>(1.40, 28.18)        |                        | 1.26<br>(0.56, 2.86)      | 1.20<br>(0.52, 2.75)       | 2.93<br>(1.28, 6.72)         |
| <b>DAS28-CRP</b>                         |                        |                           |                            |                              |                        |                           |                            |                              |
| LS Mean change (SE)                      | -1.01<br>(0.075)       | -1.49<br>(0.054)          | -1.44<br>(0.053)           | -1.96<br>(0.076)             | -0.71<br>(0.085)       | -1.28<br>(0.064)          | -1.35<br>(0.064)           | -2.02<br>(0.082)             |
| LS mean difference from placebo (95% CI) |                        | -0.48<br>(-0.66, -0.30)   | -0.43<br>(-0.61, -0.25)    | -0.95<br>(-1.16, -0.74)      |                        | -0.57<br>(-0.75, -0.40)   | -0.64<br>(-0.82, -0.47)    | -1.31<br>(-1.52, -1.11)      |
| <b>DAS28-CRP ≤3.2</b>                    |                        |                           |                            |                              |                        |                           |                            |                              |
| Responders, %                            | 11.3                   | 20.2                      | 19.4                       | 33.5                         | 10.4                   | 23.2                      | 23.6                       | 40.7                         |
| Difference vs placebo, % (95% CI)        |                        | 9.0<br>(3.6, 14.3)        | 8.2<br>(2.8, 13.5)         | 22.2<br>(15.0, 29.4)         |                        | 12.8<br>(7.6, 18.1)       | 13.2<br>(7.9, 18.5)        | 23.2<br>(23.2, 37.4)         |
| OR vs placebo (95% CI)                   |                        | 2.04<br>(1.28, 3.26)      | 1.89<br>(1.18, 3.04)       | 4.00<br>(2.44, 6.58)         |                        | 2.89<br>(1.80, 4.64)      | 2.93<br>(1.82, 4.70)       | 7.84<br>(4.73, 13.00)        |
| <b>DAS28-CRP &lt;2.6</b>                 |                        |                           |                            |                              |                        |                           |                            |                              |
| Responders, %                            | 5.2                    | 10.3                      | 8.4                        | 17.1                         | 5.5                    | 11.5                      | 12.0                       | 23.2                         |

|                                              |                   |                         |                         |                         |                   |                         |                         |                         |
|----------------------------------------------|-------------------|-------------------------|-------------------------|-------------------------|-------------------|-------------------------|-------------------------|-------------------------|
| Difference vs placebo, % (95% CI)            |                   | 5.2<br>(1.2, 9.1)       | 3.3<br>(-0.5, 7.0)      | 11.9<br>(6.4, 17.5)     |                   | 6.0<br>(2.0, 10.0)      | 6.5<br>(2.4, 10.6)      | 17.6<br>(11.7, 23.6)    |
| OR vs placebo (95% CI)                       |                   | 2.13<br>(1.11, 4.09)    | 1.66<br>(0.84, 3.26)    | 3.68<br>(1.86, 7.27)    |                   | 2.42<br>(1.27, 4.59)    | 2.50<br>(1.32, 4.75)    | 6.34<br>(3.27, 12.28)   |
| <b>ACR50</b>                                 |                   |                         |                         |                         |                   |                         |                         |                         |
| Responders, %                                | 12.2              | 23.3                    | 20.0                    | 34.1                    | 9.5               | 21.6                    | 25.1                    | 39.4                    |
| Difference vs placebo, % (95% CI)            |                   | 11.0<br>(5.5, 16.6)     | 7.8<br>(2.3, 13.2)      | 21.9<br>(14.6, 29.1)    |                   | 12.2<br>(7.1, 17.2)     | 15.6<br>(10.4, 20.8)    | 30.0<br>(23.0, 36.9)    |
| OR vs placebo (95% CI)                       |                   | 2.18<br>(1.41, 3.37)    | 1.79<br>(1.15, 2.78)    | 3.69<br>(2.31, 5.87)    |                   | 2.65<br>(1.65, 4.26)    | 3.28<br>(2.05, 5.25)    | 6.57<br>(4.01, 10.78)   |
| <b>ACR70</b>                                 |                   |                         |                         |                         |                   |                         |                         |                         |
| Responders, %                                | 3.5               | 8.5                     | 6.1                     | 13.9                    | 4.2               | 6.9                     | 9.6                     | 18.9                    |
| Difference vs placebo, % (95% CI)            |                   | 5.0<br>(1.4, 8.5)       | 2.6<br>(-0.6, 5.8)      | 10.3<br>(5.3, 15.3)     |                   | 2.7<br>(-0.7, 6.1)      | 5.4<br>(1.7, 9.0)       | 14.7<br>(9.2, 20.1)     |
| OR vs placebo (95% CI)                       |                   | 2.54<br>(1.17, 5.49)    | 1.79<br>(0.80, 4.02)    | 4.37<br>(1.96, 9.73)    |                   | 1.70<br>(0.82, 3.50)    | 2.43<br>(1.20, 4.92)    | 5.44<br>(2.67, 11.10)   |
| <b>Additional ACR core data set measures</b> |                   |                         |                         |                         |                   |                         |                         |                         |
| <b>TJC68</b>                                 |                   |                         |                         |                         |                   |                         |                         |                         |
| LS mean change (SE)                          | -7.43<br>(0.638)  | -11.38<br>(0.458)       | -10.39<br>(0.449)       | -12.72<br>(0.638)       | -5.41<br>(0.715)  | -8.86<br>(0.547)        | -9.70<br>(0.543)        | -12.29<br>(0.698)       |
| LS mean difference from placebo (95% CI)     |                   | -3.95<br>(-5.47, -2.43) | -2.96<br>(-4.48, -1.44) | -5.29<br>(-7.05, -3.53) |                   | -3.45<br>(-4.95, -1.95) | -4.29<br>(-5.79, -2.79) | -6.88<br>(-8.61, -5.15) |
| <b>SJC66</b>                                 |                   |                         |                         |                         |                   |                         |                         |                         |
| LS mean change (SE)                          | -6.14<br>(0.426)  | -8.31<br>(0.306)        | -7.68<br>(0.300)        | -9.71<br>(0.426)        | -4.70<br>(0.485)  | -7.20<br>(0.371)        | -7.81<br>(0.368)        | -9.51<br>(0.473)        |
| LS mean difference from placebo (95% CI)     |                   | -2.17<br>(-3.19, -1.16) | -1.54<br>(-2.56, -0.53) | -3.57<br>(-4.74, -2.40) |                   | -2.49<br>(-3.51, -1.48) | -3.10<br>(-4.12, -2.09) | -4.81<br>(-5.98, -3.63) |
| <b>PtGA</b>                                  |                   |                         |                         |                         |                   |                         |                         |                         |
| LS mean change (SE)                          | -15.58<br>(1.410) | -22.06<br>(1.014)       | -19.12<br>(0.991)       | -26.93<br>(1.414)       | -10.49<br>(1.559) | -18.46<br>(1.191)       | -17.33<br>(1.180)       | -26.72<br>(1.518)       |

|                                          |                   |                         |                         |                           |                   |                          |                          |                            |
|------------------------------------------|-------------------|-------------------------|-------------------------|---------------------------|-------------------|--------------------------|--------------------------|----------------------------|
| LS mean difference from placebo (95% CI) |                   | -6.48<br>(-9.83, -3.12) | -3.53<br>(-6.89, -0.18) | -11.34<br>(-15.22, -7.46) |                   | -7.97<br>(-11.24, -4.71) | -6.84<br>(-10.11, -3.57) | -16.23<br>(-20.00, -12.46) |
| <b>PhGA</b>                              |                   |                         |                         |                           |                   |                          |                          |                            |
| LS mean change (SE)                      | -23.88<br>(1.387) | -30.34<br>(0.996)       | -30.03<br>(0.974)       | -36.08<br>(1.390)         | -18.69<br>(1.563) | -27.26<br>(1.185)        | -27.87<br>(1.180)        | -34.47<br>(1.520)          |
| LS mean difference from placebo (95% CI) |                   | -6.46<br>(-9.77, -3.16) | -6.16<br>(-9.46, -2.85) | -12.20<br>(-16.02, -8.38) |                   | -8.57<br>(-11.84, -5.29) | -9.18<br>(-12.45, -5.91) | -15.78<br>(-19.55, -12.01) |
| <b>CRP (mg/L)</b>                        |                   |                         |                         |                           |                   |                          |                          |                            |
| LS mean change (SE)                      | 0.31<br>(1.294)   | -3.27<br>(0.929)        | -5.50<br>(0.908)        | -9.34<br>(1.315)          | 0.35<br>(1.213)   | -4.16<br>(0.913)         | -4.24<br>(0.909)         | -11.49<br>(1.163)          |
| LS mean difference from placebo (95% CI) |                   | -3.58<br>(-6.65, -0.50) | -5.81<br>(-8.88, -2.74) | -9.65<br>(-13.23, -6.06)  |                   | -4.51<br>(-7.03, -1.99)  | -4.58<br>(-7.11, -2.05)  | -11.84<br>(-14.74, -8.94)  |
| <b>Van der Heijde mTSS</b>               |                   |                         |                         |                           |                   |                          |                          |                            |
| LS Mean change (SE)                      | 0.55<br>(0.103)   | 0.15<br>(0.075)         | 0.19<br>(0.073)         | 0.13<br>(0.104)           | 0.13<br>(0.095)   | 0.31<br>(0.072)          | 0.15<br>(0.073)          | 0.09<br>(0.092)            |
| LS mean difference from placebo (95% CI) |                   | -0.40<br>(-0.64, -0.15) | -0.36<br>(-0.61, -0.12) | -0.42<br>(-0.71, -0.14)   |                   | 0.19<br>(-0.01, 0.38)    | 0.02<br>(-0.18, 0.22)    | -0.04<br>(-0.27, 0.19)     |
| <b>HRQoL</b>                             |                   |                         |                         |                           |                   |                          |                          |                            |
| <b>SF-36 PCS</b>                         |                   |                         |                         |                           |                   |                          |                          |                            |
| LS mean change (SE)                      | 3.19<br>(0.423)   | 5.38<br>(0.305)         | 4.96<br>(0.297)         | 6.93<br>(0.427)           | 2.05<br>(0.478)   | 4.29<br>(0.363)          | 4.48<br>(0.361)          | 6.58<br>(0.464)            |
| LS mean difference from placebo (95% CI) |                   | 2.19<br>(1.19, 3.20)    | 1.77<br>(0.76, 2.77)    | 3.74<br>(2.57, 4.90)      |                   | 2.24<br>(1.24, 3.24)     | 2.43<br>(1.43, 3.43)     | 4.53<br>(3.38, 5.68)       |
| <b>SF-36 MCS</b>                         |                   |                         |                         |                           |                   |                          |                          |                            |
| LS mean change (SE)                      | 2.46<br>(0.569)   | 2.88<br>(0.410)         | 2.54<br>(0.399)         | 4.04<br>(0.574)           | 2.21<br>(0.624)   | 2.24<br>(0.474)          | 2.68<br>(0.471)          | 3.56<br>(0.604)            |
| LS mean difference from placebo (95% CI) |                   | 0.42<br>(-0.93, 1.77)   | 0.08<br>(-1.27, 1.43)   | 1.58<br>(0.02, 3.15)      |                   | 0.02<br>(-1.28, 1.33)    | 0.47<br>(-0.83, 1.78)    | 1.35<br>(-0.15, 2.86)      |

ACR, American College of Rheumatology; BID, twice daily; CDAI, clinical disease activity index; CI, confidence interval; CRP, C-reactive protein; DAS28, disease activity score-28 joints; FACIT, Functional Assessment of Chronic Illness Therapy; HAQ-DI, Health Assessment Questionnaire-Disability Index; LDA, low disease activity; LS, least squares; MCS, mental component summary; mTSS, van der Heijde modified total Sharp score; OR, odds ratio; PCS, physical component summary; PhGA, physician's global assessment; PtGA, patient's global assessment; HRQoL, health-related quality of life; SE, standard error; SF-36, Short Form-36; SJC, swollen joint count; TJC, tender joint count; QW, once weekly; VAS, visual analogue scale.

**Supplementary Table 6.** Safety summary following switch from placebo to active treatment

|                                        | ContRAst 1                          |                                      |                                        | ContRAst 2                          |                                      |                                        |
|----------------------------------------|-------------------------------------|--------------------------------------|----------------------------------------|-------------------------------------|--------------------------------------|----------------------------------------|
| Adverse event, number of patients (%)  | Placebo to otilimab 90 mg QW (N=80) | Placebo to otilimab 150 mg QW (N=82) | Placebo to tofacitinib 5 mg BID (N=68) | Placebo to otilimab 90 mg QW (N=85) | Placebo to otilimab 150 mg QW (N=80) | Placebo to tofacitinib 5 mg BID (N=67) |
| <b>Week 12 to 52</b>                   |                                     |                                      |                                        |                                     |                                      |                                        |
| Any AE                                 | 49 (61)                             | 52 (63)                              | 44 (65)                                | 54 (64)                             | 52 (65)                              | 45 (67)                                |
| Any SAE                                | 8 (10)                              | 9 (11)                               | 5 (7)                                  | 5 (6)                               | 3 (4)                                | 2 (3)                                  |
| Any AESI                               | 9 (11)                              | 9 (11)                               | 3 (4)                                  | 6 (7)                               | 12 (15)                              | 3 (4)                                  |
| Serious infection*                     | 0 (0)                               | 2 (2)                                | 0 (0)                                  | 1 (1)                               | 1 (1)                                | 1 (1)                                  |
| Serious infection, excluding COVID-19* | 0 (0)                               | 2 (2)                                | 0 (0)                                  | 1 (1)                               | 1 (1)                                | 1 (1)                                  |
| Active TB*                             | 0 (0)                               | 0 (0)                                | 0 (0)                                  | 0 (0)                               | 0 (0)                                | 0 (0)                                  |
| Latent TB*                             | 5 (6)                               | 3 (4)                                | 1 (1)                                  | 0 (0)                               | 0 (0)                                | 2 (3)                                  |
| TB reactivation*                       | 0 (0)                               | 0 (0)                                | 0 (0)                                  | 0 (0)                               | 0 (0)                                | 0 (0)                                  |
| PAP*                                   | 0 (0)                               | 0 (0)                                | 0 (0)                                  | 0 (0)                               | 0 (0)                                | 0 (0)                                  |
| COVID-19 diagnosis†                    | 6 (8)                               | 9 (11)                               | 2 (3)                                  | 4 (5)                               | 7 (9)                                | 9 (13)                                 |
| Any adjudicated CV event               | 0 (0)                               | 3 (4)                                | 1 (1)                                  | 0 (0)                               | 1 (1)                                | 0 (0)                                  |
| Adjudicated MACE                       | 0 (0)                               | 3 (4)                                | 1 (1)                                  | 0 (0)                               | 1 (1)                                | 0 (0)                                  |
| VTE (DVT and/or PE)                    | 0 (0)                               | 0 (0)                                | 0 (0)                                  | 0 (0)                               | 0 (0)                                | 0 (0)                                  |

|                                |       |       |       |       |       |       |
|--------------------------------|-------|-------|-------|-------|-------|-------|
| PE                             | 0 (0) | 0 (0) | 0 (0) | 0 (0) | 0 (0) | 0 (0) |
| DVT                            | 0 (0) | 0 (0) | 0 (0) | 0 (0) | 0 (0) | 0 (0) |
| Any malignancy                 | 0 (0) | 2 (2) | 1 (1) | 2 (2) | 1 (1) | 0 (0) |
| Any malignancy, excluding NMSC | 0 (0) | 2 (2) | 1 (1) | 0 (0) | 1 (1) | 0 (0) |
| Any Fatal SAE                  | 0 (0) | 1 (1) | 0 (0) | 1 (1) | 1 (1) | 0 (0) |
| Haemorrhagic stroke            | 0 (0) | 1 (1) | 0 (0) | 0 (0) | 0 (0) | 0 (0) |
| Cardiac arrest                 | 0 (0) | 0 (0) | 0 (0) | 0 (0) | 1 (1) | 0 (0) |
| Circulatory collapse           | 0 (0) | 0 (0) | 0 (0) | 1 (1) | 0 (0) | 0 (0) |

\*Only select AESIs with relevance to the MoA of otilimab or tofacitinib are reported; †Total cases (either AEs or SAEs).

AE, adverse event; AESI, adverse event of special interest; BID, twice daily; COVID-19, coronavirus disease 2019; CV, cardiovascular; DVT, deep vein thrombosis; MACE, major adverse cardiovascular event; NMSC, non-melanoma skin cancer; PAP, pulmonary alveolar proteinosis; PE, pulmonary embolism; QW, once weekly; SAE, serious adverse event; TB, tuberculosis; VTE, venous thromboembolism.



**Supplementary Table 7.** Most common (>5%) AEs in contrRAst 1 up to Week 12 and Week 52

| Adverse event,<br>number of patients<br>(%) | ContrRAst 1                  |                                 |                                  |                                    |
|---------------------------------------------|------------------------------|---------------------------------|----------------------------------|------------------------------------|
|                                             | Pooled<br>placebo<br>(N=241) | Otilimab<br>90 mg QW<br>(N=513) | Otilimab<br>150 mg QW<br>(N=510) | Tofacitinib<br>5 mg BID<br>(N=273) |
| <b>Week 0 to 12</b>                         |                              |                                 |                                  |                                    |
| Any event                                   | 95 (39)                      | 222 (43)                        | 234 (46)                         | 122 (45)                           |
| <b>Week 0 to 52*</b>                        |                              |                                 |                                  |                                    |
| Any event                                   |                              | 367 (72)                        | 383 (75)                         | 207 (76)                           |
| COVID-19                                    |                              | 43 (8)                          | 49 (10)                          | 31 (11)                            |
| Lymphopaenia                                |                              | 30 (6)                          | 35 (7)                           | 16 (6)                             |
| ALT increase                                |                              | 23 (4)                          | 31 (6)                           | 13 (5)                             |
| Urinary tract infection                     |                              | 23 (4)                          | 23 (5)                           | 19 (7)                             |
| Upper respiratory tract infection           |                              | 22 (4)                          | 20 (4)                           | 18 (7)                             |
| Anaemia                                     |                              | 22 (4)                          | 27 (5)                           | 8 (3)                              |

Events listed according to the MedDRA Preferred Terms used for the coding of events reported by investigators. \*Data reported for patients who were randomised to active treatments from baseline.

AE, adverse event; ALT, alanine aminotransferase; COVID-19, coronavirus disease 2019.

**Supplementary Table 8.** Most common (>5%) AEs in contRAst 2 up to Week 12 and Week 52

| Adverse event,<br>number of patients<br>(%) | ContRAst 2                   |                                 |                                  |                                    |
|---------------------------------------------|------------------------------|---------------------------------|----------------------------------|------------------------------------|
|                                             | Pooled<br>placebo<br>(N=255) | Otilimab<br>90 mg QW<br>(N=545) | Otilimab<br>150 mg QW<br>(N=539) | Tofacitinib<br>5 mg BID<br>(N=286) |
| <b>Week 0 to 12</b>                         |                              |                                 |                                  |                                    |
| Any event                                   | 127 (50)                     | 267 (49)                        | 268 (50)                         | 143 (50)                           |
| Injection site reaction                     | 3 (1)                        | 23 (4)                          | 36 (7)                           | 2 (<1)                             |
| <b>Week 0 to 52*</b>                        |                              |                                 |                                  |                                    |
| Any event                                   |                              | 420 (77)                        | 408 (76)                         | 224 (78)                           |
| COVID-19                                    |                              | 50 (9)                          | 34 (6)                           | 27 (9)                             |
| RA                                          |                              | 42 (8)                          | 42 (8)                           | 21 (7)                             |
| Lymphopaenia                                |                              | 33 (6)                          | 38 (7)                           | 24 (8)                             |
| Injection site reaction                     |                              | 42 (8)                          | 47 (9)                           | 5 (2)                              |
| Urinary tract infection                     |                              | 34 (6)                          | 39 (7)                           | 19 (7)                             |
| Hypertension                                |                              | 30 (6)                          | 31 (6)                           | 19 (7)                             |
| Nasopharyngitis                             |                              | 28 (5)                          | 33 (6)                           | 15 (5)                             |
| Headache                                    |                              | 33 (6)                          | 19 (4)                           | 13 (5)                             |
| Anaemia                                     |                              | 35 (6)                          | 20 (4)                           | 9 (3)                              |

Events listed according to the MedDRA Preferred Terms used for the coding of events reported by investigators. \*Data reported for patients who were randomised to active treatments from baseline.

AE, adverse event; COVID-19, coronavirus disease 2019; RA, rheumatoid arthritis.

**Supplementary Table 9.** All SAEs in contRAst 1 up to Week 12 and Week 52

| Adverse event,<br>number of patients (%)                                           | ContRAst 1                   |                                 |                                  |                                    |
|------------------------------------------------------------------------------------|------------------------------|---------------------------------|----------------------------------|------------------------------------|
|                                                                                    | Pooled<br>placebo<br>(N=241) | Otilimab<br>90 mg QW<br>(N=513) | Otilimab<br>150 mg QW<br>(N=510) | Tofacitinib<br>5 mg BID<br>(N=273) |
| <b>Week 0 to 12</b>                                                                |                              |                                 |                                  |                                    |
| Any event                                                                          | 8 (3)                        | 8 (2)                           | 6 (1)                            | 9 (3)                              |
| Any infection or infestation                                                       | 3 (1)                        | 3 (1)                           | 2 (1)                            | 4 (1)                              |
| COVID-19                                                                           | 1 (<1)                       | 0                               | 0                                | 0                                  |
| COVID-19 pneumonia                                                                 | 1 (<1)                       | 1 (<1)                          | 1 (<1)                           | 2 (<1)                             |
| Sepsis                                                                             | 1 (<1)                       | 0                               | 1 (<1)                           | 1 (<1)                             |
| Cellulitis                                                                         | 0                            | 0                               | 0                                | 2 (<1)                             |
| Pneumonia                                                                          | 0                            | 0                               | 1 (<1)                           | 1 (<1)                             |
| Cellulitis staphylococcal                                                          | 0                            | 1 (<1)                          | 0                                | 0                                  |
| Gastroenteritis                                                                    | 0                            | 1 (<1)                          | 0                                | 0                                  |
| Septic shock                                                                       | 0                            | 0                               | 1 (<1)                           | 0                                  |
| Any neoplasms benign,<br>malignant and unspecified<br>(including cysts and polyps) | 2 (<1)                       | 1 (<1)                          | 0                                | 1 (<1)                             |
| Adenocarcinoma of colon                                                            | 1 (<1)                       | 0                               | 0                                | 0                                  |
| Laryngeal squamous cell<br>carcinoma                                               | 0                            | 0                               | 0                                | 1 (<1)                             |
| Ovarian fibroma                                                                    | 0                            | 0                               | 0                                | 1 (<1)                             |
| Pancoast's tumour                                                                  | 1 (<1)                       | 0                               | 0                                | 0                                  |
| Any blood and lymphatic<br>system disorders                                        | 0                            | 0                               | 2 (<1)                           | 0                                  |
| Anaemia                                                                            | 0                            | 0                               | 1 (<1)                           | 0                                  |
| Neutropenia                                                                        | 0                            | 0                               | 1 (<1)                           | 0                                  |
| Any musculoskeletal and<br>connective tissue disorders                             | 0                            | 1 (<1)                          | 0                                | 1 (<1)                             |
| Osteoarthritis                                                                     | 0                            | 0                               | 0                                | 1 (<1)                             |
| Rheumatoid arthritis                                                               | 0                            | 1 (<1)                          | 0                                | 0                                  |
| Any nervous system<br>disorders                                                    | 0                            | 1 (<1)                          | 1 (<1)                           | 0                                  |
| Cerebrovascular accident                                                           | 0                            | 1 (<1)                          | 1 (<1)                           | 0                                  |

|                                                          |        |        |        |        |
|----------------------------------------------------------|--------|--------|--------|--------|
| Any renal and urinary disorders                          | 0      | 0      | 1 (<1) | 1 (<1) |
| Acute kidney injury                                      | 0      | 0      | 0      | 1 (<1) |
| Renal failure                                            | 0      | 0      | 1 (<1) | 0      |
| Any respiratory, thoracic and mediastinal disorders      | 0      | 0      | 0      | 2 (<1) |
| Chronic obstructive pulmonary disease                    | 0      | 0      | 0      | 1 (<1) |
| Haemothorax                                              | 0      | 0      | 0      | 1 (<1) |
| Any cardiac disorder                                     | 1 (<1) | 0      | 0      | 0      |
| Atrial fibrillation                                      | 1 (<1) | 0      | 0      | 0      |
| Any ear and labyrinth disorders                          | 0      | 1 (<1) | 0      | 0      |
| Meniere's disease                                        | 0      | 1 (<1) | 0      | 0      |
| Any gastrointestinal disorder                            | 0      | 0      | 0      | 1 (<1) |
| Gastric ulcer perforation                                | 0      | 0      | 0      | 1 (<1) |
| Any general disorders and administration site conditions | 0      | 0      | 1 (<1) | 0      |
| Death                                                    | 0      | 0      | 1 (<1) | 0      |
| Any hepatobiliary disorders                              | 0      | 1 (<1) | 0      | 0      |
| Chronic hepatitis                                        | 0      | 1 (<1) | 0      | 0      |
| Hepatic cirrhosis                                        | 0      | 1 (<1) | 0      | 0      |
| Hepatorenal failure                                      | 0      | 1 (<1) | 0      | 0      |
| Any injury, poisoning and procedural complications       | 1 (<1) | 0      | 0      | 0      |
| Tendon rupture                                           | 1 (<1) | 0      | 0      | 0      |
| Any metabolism and nutrition disorders                   | 0      | 0      | 0      | 1 (<1) |
| Hyperglycaemic hyperosmolar non-ketotic syndrome         | 0      | 0      | 0      | 1 (<1) |
| Any psychiatric disorders                                | 1 (<1) | 0      | 0      | 0      |
| Conversion disorder                                      | 1 (<1) | 0      | 0      | 0      |
| Any reproductive system and breast disorders             | 0      | 0      | 1 (<1) | 0      |
| Intermenstrual bleeding                                  | 0      | 0      | 1 (<1) | 0      |
| Any vascular disorders                                   | 0      | 0      | 0      | 1 (<1) |

| Hypertension                                        | 0 | 0                                        | 0                                         | 1 (<1)                                      |
|-----------------------------------------------------|---|------------------------------------------|-------------------------------------------|---------------------------------------------|
|                                                     |   | <b>Otilimab<br/>90 mg QW<br/>(N=513)</b> | <b>Otilimab<br/>150 mg QW<br/>(N=510)</b> | <b>Tofacitinib 5<br/>mg BID<br/>(N=273)</b> |
| <b>Week 0 to 52*</b>                                |   |                                          |                                           |                                             |
| Any event                                           |   | 33 (6)                                   | 39 (8)                                    | 23 (8)                                      |
| Any infection or infestation                        |   | 16 (3)                                   | 18 (4)                                    | 8 (3)                                       |
| COVID-19                                            |   | 0                                        | 1 (<1)                                    | 2 (<1)                                      |
| COVID-19 pneumonia                                  |   | 7 (1)                                    | 10 (2)                                    | 4 (1)                                       |
| Pneumonia                                           |   | 2 (<1)                                   | 3 (<1)                                    | 1 (<1)                                      |
| Cellulitis                                          |   | 1 (<1)                                   | 0                                         | 2 (<1)                                      |
| Abscess limb                                        |   | 0                                        | 2 (<1)                                    | 0                                           |
| Sepsis                                              |   | 0                                        | 1 (<1)                                    | 1 (<1)                                      |
| Septic shock                                        |   | 0                                        | 2 (<1)                                    | 0                                           |
| Acinetobacter sepsis                                |   | 0                                        | 1 (<1)                                    | 0                                           |
| Arthritis bacterial                                 |   | 0                                        | 1 (<1)                                    | 0                                           |
| Bursitis infective                                  |   | 0                                        | 1 (<1)                                    | 0                                           |
| Cellulitis staphylococcal                           |   | 1 (<1)                                   | 0                                         | 0                                           |
| Chronic tonsillitis                                 |   | 1 (<1)                                   | 0                                         | 0                                           |
| Diverticulitis                                      |   | 1 (<1)                                   | 0                                         | 0                                           |
| Diverticulitis intestinal perforated                |   | 0                                        | 1 (<1)                                    | 0                                           |
| Gastroenteritis                                     |   | 1 (<1)                                   | 0                                         | 0                                           |
| Hepatitis E                                         |   | 0                                        | 1 (<1)                                    | 0                                           |
| Joint abscess                                       |   | 1 (<1)                                   | 0                                         | 0                                           |
| Post procedural cellulitis                          |   | 0                                        | 1 (<1)                                    | 0                                           |
| Postoperative wound infection                       |   | 1 (<1)                                   | 0                                         | 0                                           |
| Urinary tract infection                             |   | 0                                        | 1 (<1)                                    | 0                                           |
| Wound infection pseudomonas                         |   | 1 (<1)                                   | 0                                         | 0                                           |
| Wound infection staphylococcal                      |   | 1 (<1)                                   | 0                                         | 0                                           |
| Any musculoskeletal and connective tissue disorders |   | 4 (<1)                                   | 6 (1)                                     | 4 (1)                                       |
| Rheumatoid arthritis                                |   | 2 (<1)                                   | 5 (<1)                                    | 0                                           |
| Osteoarthritis                                      |   | 2 (<1)                                   | 0                                         | 2 (<1)                                      |
| Arthritis                                           |   | 0                                        | 1 (<1)                                    | 0                                           |
| Costochondritis                                     |   | 0                                        | 0                                         | 1 (<1)                                      |
| Foot deformity                                      |   | 0                                        | 0                                         | 1 (<1)                                      |
| Fracture non-union                                  |   | 0                                        | 1 (<1)                                    | 0                                           |

|                                                                               |  |        |        |        |
|-------------------------------------------------------------------------------|--|--------|--------|--------|
| Musculoskeletal chest pain                                                    |  | 0      | 0      | 1 (<1) |
| Any injury, poisoning and procedural complications                            |  | 4 (<1) | 5 (<1) | 1 (<1) |
| Ankle fracture                                                                |  | 0      | 1 (<1) | 0      |
| Cervical vertebral fracture                                                   |  | 1 (<1) | 0      | 0      |
| Femoral neck fracture                                                         |  | 0      | 1 (<1) | 0      |
| Femur fracture                                                                |  | 1 (<1) | 0      | 0      |
| Humerus fracture                                                              |  | 0      | 1 (<1) | 0      |
| Lower limb fracture                                                           |  | 0      | 1 (<1) | 0      |
| Multiple injuries                                                             |  | 1 (<1) | 0      | 0      |
| Post procedural complication                                                  |  | 1 (<1) | 0      | 0      |
| Radius fracture                                                               |  | 0      | 0      | 1 (<1) |
| Rib fracture                                                                  |  | 1 (<1) | 0      | 0      |
| Tibia fracture                                                                |  | 0      | 0      | 1 (<1) |
| Ulna fracture                                                                 |  | 0      | 1 (<1) | 0      |
| Any nervous system disorders                                                  |  | 2 (<1) | 5 (<1) | 1 (<1) |
| Cerebrovascular accident                                                      |  | 1 (<1) | 1 (<1) | 0      |
| Neuropathy peripheral                                                         |  | 1 (<1) | 1 (<1) | 0      |
| Cerebral infarction                                                           |  | 0      | 1 (<1) | 0      |
| Dizziness                                                                     |  | 0      | 1 (<1) | 0      |
| Headache                                                                      |  | 0      | 1 (<1) | 0      |
| Hypertensive encephalopathy                                                   |  | 0      | 1 (<1) | 0      |
| Ischaemic stroke                                                              |  | 0      | 1 (<1) | 0      |
| Lumbar radiculopathy                                                          |  | 0      | 0      | 1 (<1) |
| Metabolic encephalopathy                                                      |  | 0      | 1 (<1) | 0      |
| Syncope                                                                       |  | 0      | 1 (<1) | 0      |
| Vascular encephalopathy                                                       |  | 0      | 1 (<1) | 0      |
| Vertebrobasilar insufficiency                                                 |  | 0      | 1 (<1) | 0      |
| Any neoplasms, benign, malignant and unspecified (including cysts and polyps) |  | 2 (<1) | 1 (<1) | 3 (1)  |
| Lung adenocarcinoma                                                           |  | 0      | 0      | 2 (<1) |
| Breast cancer                                                                 |  | 0      | 1 (<1) | 0      |
| Laryngeal squamous cell carcinoma                                             |  | 1 (<1) | 0      | 0      |
| Ovarian adenoma                                                               |  | 1 (<1) | 0      | 0      |
| Ovarian fibroma                                                               |  | 0      | 0      | 1 (<1) |
| Any blood and lymphatic system disorders                                      |  | 0      | 4 (<1) | 0      |
| Anaemia                                                                       |  | 0      | 2 (<1) | 0      |

|                                                          |  |        |        |        |
|----------------------------------------------------------|--|--------|--------|--------|
| Neutropenia                                              |  | 0      | 1 (<1) | 0      |
| Pancytopenia                                             |  | 0      | 1 (<1) | 0      |
| Any cardiac disorders                                    |  | 4 (<1) | 0      | 0      |
| Acute myocardial infarction                              |  | 2 (<1) | 0      | 0      |
| Cardiac arrest                                           |  | 1 (<1) | 0      | 0      |
| Coronary artery disease                                  |  | 1 (<1) | 0      | 0      |
| Myocardial infarction                                    |  | 1 (<1) | 0      | 0      |
| Any gastrointestinal disorders                           |  | 1 (<1) | 1 (<1) | 2 (<1) |
| Colitis ischaemic                                        |  | 0      | 1 (<1) | 0      |
| Diverticulum intestinal                                  |  | 0      | 0      | 1 (<1) |
| Gastric ulcer perforation                                |  | 0      | 0      | 1 (<1) |
| Gastritis erosive                                        |  | 1 (<1) | 0      | 0      |
| Intussusception                                          |  | 1 (<1) | 0      | 0      |
| Any renal and urinary disorders                          |  | 1 (<1) | 2 (<1) | 1 (<1) |
| Acute kidney injury                                      |  | 0      | 0      | 1 (<1) |
| Nephrolithiasis                                          |  | 1 (<1) | 0      | 0      |
| Neurogenic bladder                                       |  | 0      | 1 (<1) | 0      |
| Renal failure                                            |  | 0      | 1 (<1) | 0      |
| Any vascular disorders                                   |  | 2 (<1) | 1 (<1) | 1 (<1) |
| Hypertension                                             |  | 1 (<1) | 0      | 1 (<1) |
| Circulatory collapse                                     |  | 0      | 1 (<1) | 0      |
| Deep vein thrombosis                                     |  | 1 (<1) | 0      | 0      |
| Any general disorders and administration site conditions |  | 0      | 2 (<1) | 1 (<1) |
| Death                                                    |  | 0      | 2 (<1) | 0      |
| Chest pain                                               |  | 0      | 0      | 1 (<1) |
| Any endocrine disorders                                  |  | 0      | 1 (<1) | 1 (<1) |
| Cushing's syndrome                                       |  | 0      | 1 (<1) | 0      |
| Goitre                                                   |  | 0      | 0      | 1 (<1) |
| Any hepatobiliary disorders                              |  | 1 (<1) | 1 (<1) | 0      |
| Chronic hepatitis                                        |  | 1 (<1) | 0      | 0      |
| Drug-induced liver injury                                |  | 0      | 1 (<1) | 0      |
| Hepatic cirrhosis                                        |  | 1 (<1) | 0      | 0      |
| Hepatorenal failure                                      |  | 1 (<1) | 0      | 0      |
| Any respiratory, thoracic and mediastinal disorders      |  | 0      | 0      | 2 (<1) |
| Chronic obstructive pulmonary disease                    |  | 0      | 0      | 1 (<1) |
| Haemothorax                                              |  | 0      | 0      | 1 (<1) |

|                                                 |  |        |        |        |
|-------------------------------------------------|--|--------|--------|--------|
| Any ear and labyrinth disorders                 |  | 1 (<1) | 0      | 0      |
| Meniere's disease                               |  | 1 (<1) | 0      | 0      |
| Any investigations                              |  | 0      | 0      | 1 (<1) |
| ALT increased                                   |  | 0      | 0      | 1 (<1) |
| Any metabolism and nutrition disorders          |  | 0      | 0      | 1 (<1) |
| Hyperglycaemic hyperosmolar nonketotic syndrome |  | 0      | 0      | 1 (<1) |
| Any product issues                              |  | 0      | 1 (<1) | 0      |
| Device malfunction                              |  | 0      | 1 (<1) | 0      |
| Any reproductive system and breast disorders    |  | 0      | 1 (<1) | 0      |
| Intermenstrual bleeding                         |  | 0      | 1 (<1) | 0      |

Events listed according to the MedDRA Preferred Terms used for the coding of events reported by investigators. \*Data reported for patients who were randomised to active treatments from baseline.

ALT, alanine aminotransferase; BID, twice daily; COVID-19, coronavirus disease 2019; MedDRA, Medical Dictionary for Regulatory Activities; QW, once weekly; SAE, serious adverse event.



**Supplementary Table 10.** All SAEs in contRAst 2 up to Week 12 and Week 52

| Adverse event,<br>number of patients (%)                                     | ContRAst 2                   |                                 |                                  |                                    |
|------------------------------------------------------------------------------|------------------------------|---------------------------------|----------------------------------|------------------------------------|
|                                                                              | Pooled<br>placebo<br>(N=255) | Otilimab<br>90 mg QW<br>(N=545) | Otilimab<br>150 mg QW<br>(N=539) | Tofacitinib<br>5 mg BID<br>(N=286) |
| <b>Week 0 to 12</b>                                                          |                              |                                 |                                  |                                    |
| Any event                                                                    | 6 (2)                        | 12 (2)                          | 19 (4)                           | 6 (2)                              |
| Any infection or infestation                                                 | 1 (<1)                       | 2 (<1)                          | 7 (1)                            | 1 (<1)                             |
| COVID-19                                                                     | 0                            | 0                               | 1 (<1)                           | 0                                  |
| COVID-19 pneumonia                                                           | 0                            | 0                               | 3 (<1)                           | 0                                  |
| Pneumonia                                                                    | 0                            | 1 (<1)                          | 1 (<1)                           | 0                                  |
| Appendicitis                                                                 | 0                            | 0                               | 1 (<1)                           | 0                                  |
| Herpes zoster                                                                | 0                            | 0                               | 1 (<1)                           | 0                                  |
| Pneumocystis jirovecii pneumonia                                             | 0                            | 0                               | 0                                | 1 (<1)                             |
| Pyelonephritis                                                               | 0                            | 1 (<1)                          | 0                                | 0                                  |
| Urinary tract infection                                                      | 1 (<1)                       | 0                               | 0                                | 0                                  |
| Any musculoskeletal and connective tissue disorders                          | 2 (<1)                       | 2 (<1)                          | 2 (<1)                           | 1 (<1)                             |
| Osteoarthritis                                                               | 1 (<1)                       | 2 (<1)                          | 1 (<1)                           | 0                                  |
| Back pain                                                                    | 0                            | 0                               | 1 (<1)                           | 0                                  |
| Intervertebral disc degeneration                                             | 0                            | 0                               | 0                                | 1 (<1)                             |
| Synovitis                                                                    | 1 (<1)                       | 0                               | 0                                | 0                                  |
| Any cardiac disorder                                                         | 0                            | 3 (<1)                          | 3 (<1)                           | 0                                  |
| Acute myocardial infarction                                                  | 0                            | 1 (<1)                          | 0                                | 0                                  |
| Angina unstable                                                              | 0                            | 0                               | 1 (<1)                           | 0                                  |
| Atrial fibrillation                                                          | 0                            | 0                               | 1 (<1)                           | 0                                  |
| Myocardial infarction                                                        | 0                            | 1 (<1)                          | 0                                | 0                                  |
| Pericardial effusion                                                         | 0                            | 0                               | 1 (<1)                           | 0                                  |
| Sinus node dysfunction                                                       | 0                            | 1 (<1)                          | 0                                | 0                                  |
| Any neoplasms benign, malignant and unspecified (including cysts and polyps) | 1 (<1)                       | 1 (<1)                          | 3 (<1)                           | 0                                  |

|                                                     |        |        |        |        |
|-----------------------------------------------------|--------|--------|--------|--------|
| Colorectal adenoma                                  | 1 (<1) | 1 (<1) | 0      | 0      |
| Cardiac myxoma                                      | 0      | 0      | 1 (<1) | 0      |
| Invasive ductal breast carcinoma                    | 0      | 0      | 1 (<1) | 0      |
| Invasive lobular breast carcinoma                   | 0      | 0      | 1 (<1) | 0      |
| Metastases to liver                                 | 0      | 0      | 1 (<1) | 0      |
| Any hepatobiliary disorders                         | 0      | 2 (<1) | 1 (<1) | 0      |
| Acute hepatic failure                               | 0      | 0      | 1 (<1) | 0      |
| Bile duct stone                                     | 0      | 1 (<1) | 0      | 0      |
| Cholecystitis acute                                 | 0      | 1 (<1) | 0      | 0      |
| Any injury, poisoning and procedural complications  | 0      | 0      | 2 (<1) | 1 (<1) |
| Joint injury                                        | 0      | 0      | 1 (<1) | 0      |
| Overdose                                            | 0      | 0      | 1 (<1) | 0      |
| Tendon rupture                                      | 0      | 0      | 0      | 1 (<1) |
| Any investigations                                  | 2 (<1) | 0      | 0      | 0      |
| ALT increased                                       | 1 (<1) | 0      | 0      | 0      |
| Transaminases increased                             | 1 (<1) | 0      | 0      | 0      |
| Any nervous system disorders                        | 0      | 0      | 1 (<1) | 1 (<1) |
| Seizure                                             | 0      | 0      | 0      | 1 (<1) |
| Subarachnoid haemorrhage                            | 0      | 0      | 1 (<1) | 0      |
| Syncope                                             | 0      | 0      | 0      | 1 (<1) |
| Any reproductive system and breast disorders        | 0      | 1 (<1) | 1 (<1) | 0      |
| Menopausal symptoms                                 | 0      | 0      | 1 (<1) | 0      |
| Uterine polyp                                       | 0      | 1 (<1) | 0      | 0      |
| Any respiratory, thoracic and mediastinal disorders | 0      | 0      | 2 (<1) | 0      |
| Pleural effusion                                    | 0      | 0      | 1 (<1) | 0      |
| Pulmonary embolism                                  | 0      | 0      | 1 (<1) | 0      |
| Any blood and lymphatic system disorders            | 0      | 0      | 1 (<1) | 0      |
| Anaemia                                             | 0      | 0      | 1 (<1) | 0      |

|                                                          |   |                                          |                                           |                                             |
|----------------------------------------------------------|---|------------------------------------------|-------------------------------------------|---------------------------------------------|
| Any gastrointestinal disorder                            | 0 | 0                                        | 1 (<1)                                    | 0                                           |
| Mesenteric cyst                                          | 0 | 0                                        | 1 (<1)                                    | 0                                           |
| Any general disorders and administration site conditions | 0 | 0                                        | 0                                         | 1 (<1)                                      |
| Pyrexia                                                  | 0 | 0                                        | 0                                         | 1 (<1)                                      |
| Any immune system disorders                              | 0 | 0                                        | 0                                         | 1 (<1)                                      |
| Secondary amyloidosis                                    | 0 | 0                                        | 0                                         | 1 (<1)                                      |
| Any metabolism and nutrition disorders                   | 0 | 1 (<1)                                   | 0                                         | 0                                           |
| Dehydration                                              | 0 | 1 (<1)                                   | 0                                         | 0                                           |
| Any renal and urinary disorders                          | 0 | 0                                        | 1 (<1)                                    | 0                                           |
| Calculus urinary                                         | 0 | 0                                        | 1 (<1)                                    | 0                                           |
|                                                          |   | <b>Otilimab<br/>90 mg QW<br/>(N=545)</b> | <b>Otilimab<br/>150 mg QW<br/>(N=539)</b> | <b>Tofacitinib<br/>5 mg BID<br/>(N=286)</b> |
| <b>Week 0 to 52*</b>                                     |   |                                          |                                           |                                             |
| Any event                                                |   | 44 (8)                                   | 43 (8)                                    | 31 (11)                                     |
| Any infection or infestation                             |   | 12 (2)                                   | 13 (2)                                    | 12 (4)                                      |
| COVID-19                                                 |   | 1 (<1)                                   | 2 (<1)                                    | 0                                           |
| COVID-19 pneumonia                                       |   | 5 (<1)                                   | 5 (<1)                                    | 7 (2)                                       |
| Pneumonia                                                |   | 2 (<1)                                   | 1 (<1)                                    | 2 (<1)                                      |
| Appendicitis                                             |   | 0                                        | 2 (<1)                                    | 0                                           |
| Pneumocystis jirovecii pneumonia                         |   | 1 (<1)                                   | 0                                         | 1 (<1)                                      |
| Diverticulitis                                           |   | 0                                        | 1 (<1)                                    | 0                                           |
| Escherichia sepsis                                       |   | 0                                        | 0                                         | 1 (<1)                                      |
| Herpes simplex                                           |   | 0                                        | 1 (<1)                                    | 0                                           |
| Herpes zoster                                            |   | 0                                        | 1 (<1)                                    | 0                                           |
| Pneumonia bacterial                                      |   | 1 (<1)                                   | 0                                         | 0                                           |
| Post-procedural infection                                |   | 0                                        | 1 (<1)                                    | 0                                           |
| Pyelonephritis                                           |   | 1 (<1)                                   | 0                                         | 0                                           |
| Pyelonephritis acute                                     |   | 0                                        | 0                                         | 1 (<1)                                      |
| Sepsis                                                   |   | 1 (<1)                                   | 0                                         | 0                                           |
| Septic shock                                             |   | 0                                        | 0                                         | 1 (<1)                                      |
| Any musculoskeletal and connective tissue disorders      |   | 8 (1)                                    | 9 (2)                                     | 4 (1)                                       |
| Osteoarthritis                                           |   | 4 (<1)                                   | 4 (<1)                                    | 0                                           |
| Rheumatoid arthritis                                     |   | 1 (<1)                                   | 2 (<1)                                    | 1 (<1)                                      |

|                                                                              |  |        |        |        |
|------------------------------------------------------------------------------|--|--------|--------|--------|
| Back pain                                                                    |  | 0      | 1 (<1) | 0      |
| Intervertebral disc degeneration                                             |  | 0      | 0      | 1 (<1) |
| Joint destruction                                                            |  | 1 (<1) | 0      | 0      |
| Lumbar spinal stenosis                                                       |  | 1 (<1) | 0      | 0      |
| Osteonecrosis                                                                |  | 0      | 0      | 1 (<1) |
| Osteoporotic fracture                                                        |  | 0      | 0      | 1 (<1) |
| Spinal osteoarthritis                                                        |  | 0      | 1 (<1) | 0      |
| Synovial cyst                                                                |  | 0      | 1 (<1) | 0      |
| Tenosynovitis                                                                |  | 1 (<1) | 0      | 0      |
| Any neoplasms benign, malignant and unspecified (including cysts and polyps) |  | 2 (<1) | 5 (<1) | 5 (2)  |
| Invasive lobular breast carcinoma                                            |  | 0      | 2 (<1) | 0      |
| Adenocarcinoma of colon                                                      |  | 0      | 0      | 1 (<1) |
| Breast cancer                                                                |  | 0      | 0      | 1 (<1) |
| Cardiac myxoma                                                               |  | 0      | 1 (<1) | 0      |
| Chronic lymphocytic leukaemia                                                |  | 0      | 0      | 1 (<1) |
| Colorectal adenoma                                                           |  | 1 (<1) | 0      | 0      |
| Gastric cancer                                                               |  | 0      | 1 (<1) | 0      |
| Invasive ductal breast carcinoma                                             |  | 0      | 1 (<1) | 0      |
| Lung neoplasm                                                                |  | 1 (<1) | 0      | 0      |
| Metastases to liver                                                          |  | 0      | 1 (<1) | 0      |
| Pancreatic carcinoma metastatic                                              |  | 0      | 0      | 1 (<1) |
| Rectal adenocarcinoma                                                        |  | 0      | 0      | 1 (<1) |
| Any injury, poisoning and procedural complications                           |  | 2 (<1) | 6 (1)  | 3 (1)  |
| Ankle fracture                                                               |  | 1 (<1) | 0      | 1 (<1) |
| Spinal compression fracture                                                  |  | 0      | 1 (<1) | 1 (<1) |
| Incisional hernia                                                            |  | 0      | 1 (<1) | 0      |
| Joint injury                                                                 |  | 0      | 1 (<1) | 0      |
| Overdose                                                                     |  | 0      | 1 (<1) | 0      |
| Skin laceration                                                              |  | 1 (<1) | 0      | 0      |
| Tendon rupture                                                               |  | 0      | 0      | 1 (<1) |
| Tibia fracture                                                               |  | 0      | 1 (<1) | 0      |
| Wound dehiscence                                                             |  | 0      | 1 (<1) | 0      |
| Any cardiac disorder                                                         |  | 5 (<1) | 3 (<1) | 0      |
| Acute myocardial infarction                                                  |  | 2 (<1) | 0      | 0      |

|                                                          |  |        |        |        |
|----------------------------------------------------------|--|--------|--------|--------|
| Atrial fibrillation                                      |  | 1 (<1) | 1 (<1) | 0      |
| Angina unstable                                          |  | 0      | 1 (<1) | 0      |
| Myocardial infarction                                    |  | 1 (<1) | 0      | 0      |
| Pericardial effusion                                     |  | 0      | 1 (<1) | 0      |
| Sinus node dysfunction                                   |  | 1 (<1) | 0      | 0      |
| Any nervous system disorders                             |  | 3 (<1) | 2 (<1) | 3 (1)  |
| Subarachnoid haemorrhage                                 |  | 1 (<1) | 1 (<1) | 0      |
| Cerebral infarction                                      |  | 0      | 1 (<1) | 0      |
| Cerebrovascular accident                                 |  | 1 (<1) | 0      | 0      |
| Facial paralysis                                         |  | 1 (<1) | 0      | 0      |
| Ischaemic stroke                                         |  | 0      | 0      | 1 (<1) |
| Paraparesis                                              |  | 0      | 0      | 1 (<1) |
| Seizure                                                  |  | 0      | 0      | 1 (<1) |
| Syncope                                                  |  | 0      | 0      | 1 (<1) |
| Any gastrointestinal disorders                           |  | 3 (<1) | 2 (<1) | 2 (<1) |
| Acute abdomen                                            |  | 1 (<1) | 0      | 0      |
| Duodenal ulcer perforation                               |  | 1 (<1) | 0      | 0      |
| Enteritis                                                |  | 0      | 1 (<1) | 0      |
| Gastric ulcer                                            |  | 0      | 0      | 1 (<1) |
| Inguinal hernia                                          |  | 0      | 0      | 1 (<1) |
| Mesenteric cyst                                          |  | 0      | 1 (<1) | 0      |
| Peritoneal adhesions                                     |  | 1 (<1) | 0      | 0      |
| Any hepatobiliary disorders                              |  | 3 (<1) | 1 (<1) | 2 (<1) |
| Cholecystitis acute                                      |  | 2 (<1) | 0      | 0      |
| Acute hepatic failure                                    |  | 0      | 1 (<1) | 0      |
| Bile duct stone                                          |  | 1 (<1) | 0      | 0      |
| Cholelithiasis                                           |  | 0      | 0      | 1 (<1) |
| Hepatic steatosis                                        |  | 0      | 0      | 1 (<1) |
| Any blood and lymphatic system disorders                 |  | 1 (<1) | 1 (<1) | 2 (<1) |
| Anaemia                                                  |  | 0      | 1 (<1) | 1 (<1) |
| Iron deficiency anaemia                                  |  | 1 (<1) | 0      | 1 (<1) |
| Any general disorders and administration site conditions |  | 2 (<1) | 1 (<1) | 1 (<1) |
| Death                                                    |  | 1 (<1) | 0      | 0      |
| Fatigue                                                  |  | 1 (<1) | 0      | 0      |
| Pyrexia                                                  |  | 0      | 0      | 1 (<1) |

|                                                     |  |        |        |        |
|-----------------------------------------------------|--|--------|--------|--------|
| Sudden death                                        |  | 0      | 1 (<1) | 0      |
| Any reproductive system and breast disorders        |  | 3 (<1) | 1 (<1) | 0      |
| Endometrial hyperplasia                             |  | 1 (<1) | 0      | 0      |
| Hydrosalpinx                                        |  | 1 (<1) | 0      | 0      |
| Menopausal symptoms                                 |  | 0      | 1 (<1) | 0      |
| Ovarian cyst                                        |  | 1 (<1) | 0      | 0      |
| Uterine polyp                                       |  | 1 (<1) | 0      | 0      |
| Any respiratory, thoracic and mediastinal disorders |  | 0      | 4 (<1) | 0      |
| Pulmonary embolism                                  |  | 0      | 2 (<1) | 0      |
| Pleural effusion                                    |  | 0      | 1 (<1) | 0      |
| Pulmonary fibrosis                                  |  | 0      | 1 (<1) | 0      |
| Any eye disorders                                   |  | 1 (<1) | 0      | 1 (<1) |
| Glaucoma                                            |  | 0      | 0      | 1 (<1) |
| Ulcerative keratitis                                |  | 1 (<1) | 0      | 0      |
| Any renal and urinary disorders                     |  | 0      | 2 (<1) | 0      |
| Calculus urinary                                    |  | 0      | 1 (<1) | 0      |
| IgA nephropathy                                     |  | 0      | 1 (<1) | 0      |
| Any immune system disorders                         |  | 0      | 0      | 1 (<1) |
| Secondary amyloidosis                               |  | 0      | 0      | 1 (<1) |
| Any investigations                                  |  | 0      | 0      | 1 (<1) |
| International normalised ratio increased            |  | 0      | 0      | 1 (<1) |
| Any metabolism and nutrition disorders              |  | 1 (<1) | 0      | 0      |
| Dehydration                                         |  | 1 (<1) | 0      | 0      |
| Any product issues                                  |  | 1 (<1) | 0      | 0      |
| Device dislocation                                  |  | 1 (<1) | 0      | 0      |
| Any vascular disorders                              |  | 0      | 1 (<1) | 0      |
| Deep vein thrombosis                                |  | 0      | 1 (<1) | 0      |

Events listed according to the MedDRA Preferred Terms used for the coding of events reported by investigators. \*Data reported for patients who were randomised to active treatments from baseline.

ALT, alanine aminotransferase; BID, twice daily; COVID-19, coronavirus disease 2019; MedDRA, Medical Dictionary for Regulatory Activities; QW, once weekly; SAE, serious adverse event.

**Supplementary Table 11.** AESIs up to Week 12 and Week 52 in contrRAst 1 and contrRAst 2

| Adverse event,<br>number of patients (%)             | ContrRAst 1                  |                                 |                                  |                                    | ContrRAst 2                  |                                 |                                  |                                    |
|------------------------------------------------------|------------------------------|---------------------------------|----------------------------------|------------------------------------|------------------------------|---------------------------------|----------------------------------|------------------------------------|
|                                                      | Pooled<br>placebo<br>(N=241) | Otilimab<br>90 mg QW<br>(N=513) | Otilimab<br>150 mg QW<br>(N=510) | Tofacitinib<br>5 mg BID<br>(N=273) | Pooled<br>placebo<br>(N=255) | Otilimab<br>90 mg QW<br>(N=545) | Otilimab<br>150 mg QW<br>(N=539) | Tofacitinib<br>5 mg BID<br>(N=286) |
| <b>Week 0 to 12</b>                                  |                              |                                 |                                  |                                    |                              |                                 |                                  |                                    |
| Any AESI                                             | 4 (2)                        | 25 (5)                          | 26 (5)                           | 5 (2)                              | 5 (2)                        | 27 (5)                          | 44 (8)                           | 5 (2)                              |
| Serious infections                                   | 3 (1)                        | 3 (<1)                          | 2 (<1)                           | 4 (1)                              | 1 (<1)                       | 2 (<1)                          | 7 (1)                            | 1 (<1)                             |
| Serious infections, excluding<br>COVID-19 infections | 1 (<1)                       | 2 (<1)                          | 1 (<1)                           | 3 (1)                              | 1 (<1)                       | 2 (<1)                          | 3 (<1)                           | 1 (<1)                             |
| Opportunistic infections                             | 0                            | 0                               | 1 (<1)                           | 0                                  | 0                            | 0                               | 1 (<1)                           | 2 (<1)                             |
| Active TB                                            | 0                            | 0                               | 0                                | 0                                  | 0                            | 0                               | 0                                | 0                                  |
| Latent TB                                            | 0                            | 0                               | 0                                | 0                                  | 0                            | 0                               | 0                                | 0                                  |
| TB reactivation                                      | 0                            | 0                               | 0                                | 0                                  | 0                            | 0                               | 0                                | 0                                  |
| Neutropenia                                          | 1 (<1)                       | 4 (<1)                          | 5 (<1)                           | 0                                  | 1 (<1)                       | 1 (<1)                          | 1 (<1)                           | 0                                  |
| Persistent cough<br>(for ≥21 days)                   | 0                            | 0                               | 0                                | 0                                  | 0                            | 2 (<1)                          | 1 (<1)                           | 0                                  |
| Persistent dyspnoea (≥21<br>days)                    | 0                            | 1 (<1)                          | 0                                | 0                                  | 0                            | 1 (<1)                          | 1 (<1)                           | 0                                  |
| PAP                                                  | 0                            | 0                               | 0                                | 0                                  | 0                            | 0                               | 0                                | 0                                  |
| Serious hypersensitivity<br>reactions                | 0                            | 0                               | 0                                | 0                                  | 0                            | 0                               | 0                                | 0                                  |
| Injection site reactions                             | 0                            | 18 (4)                          | 19 (4)                           | 1 (<1)                             | 3 (1)                        | 23 (4)                          | 36 (7)                           | 3 (1)                              |
| <b>Week 0 to 52*</b>                                 |                              |                                 |                                  |                                    |                              |                                 |                                  |                                    |
| Any AESI, n (%)                                      |                              | 65 (13)                         | 58 (11)                          | 22 (8)                             |                              | 72 (13)                         | 75 (14)                          | 32 (11)                            |
| Serious infections                                   |                              | 16 (3)                          | 18 (4)                           | 8 (3)                              |                              | 12 (2)                          | 13 (2)                           | 12 (4)                             |

|                                                   |  |        |        |        |  |        |        |        |
|---------------------------------------------------|--|--------|--------|--------|--|--------|--------|--------|
| Serious infections, excluding COVID-19 infections |  | 9 (2)  | 8 (2)  | 3 (1)  |  | 6 (1)  | 7 (1)  | 6 (2)  |
| Opportunistic infections                          |  | 0      | 2 (<1) | 0      |  | 3 (<1) | 1 (<1) | 5 (2)  |
| Active TB                                         |  | 0      | 0      | 0      |  | 0      | 0      | 0      |
| Latent TB                                         |  | 22 (4) | 9 (2)  | 11 (4) |  | 15 (3) | 10 (2) | 8 (3)  |
| TB reactivation                                   |  | 0      | 0      | 0      |  | 0      | 0      | 0      |
| Neutropenia                                       |  | 6 (1)  | 8 (2)  | 1 (<1) |  | 2 (<1) | 3 (<1) | 1 (<1) |
| Persistent cough                                  |  | 0      | 0      | 1 (<1) |  | 2 (<1) | 1 (<1) | 0      |
| Persistent dyspnoea                               |  | 1 (<1) | 0      | 1 (<1) |  | 1 (<1) | 3 (<1) | 0      |
| PAP                                               |  | 0      | 0      | 0      |  | 0      | 0      | 0      |
| Serious hypersensitivity reactions                |  | 0      | 0      | 0      |  | 0      | 0      | 0      |
| Injection site reactions                          |  | 21 (4) | 24 (5) | 2 (<1) |  | 42 (8) | 47 (9) | 7 (2)  |

\*Data reported for patients who were randomised to active treatments from baseline.

AESI, adverse event of special interest; BID, twice daily; COVID-19, coronavirus disease 2019; MedDRA, Medical Dictionary for Regulatory Activities; QW, once weekly; TB, tuberculosis.



**Supplementary Table 12.** Fatal SAEs up to Week 12 and Week 52 in contrRAst 1 and contrRAst 2

|                                   | ContrRAst 1            |                           |                            |                              | ContrRAst 2            |                           |                            |                              |
|-----------------------------------|------------------------|---------------------------|----------------------------|------------------------------|------------------------|---------------------------|----------------------------|------------------------------|
| Adverse event, number of patients | Pooled placebo (N=241) | Otilimab 90 mg QW (N=513) | Otilimab 150 mg QW (N=510) | Tofacitinib 5 mg BID (N=273) | Pooled placebo (N=256) | Otilimab 90 mg QW (N=545) | Otilimab 150 mg QW (N=539) | Tofacitinib 5 mg BID (N=286) |
| <b>Week 0 to 12</b>               |                        |                           |                            |                              |                        |                           |                            |                              |
| Any fatal SAE                     | 1                      | 1                         | 1                          | 2                            | 0                      | 0                         | 4                          | 0                            |
| COVID-19 pneumonia                | 0                      | 0                         | 0                          | 1                            | 0                      | 0                         | 1                          | 0                            |
| Adenocarcinoma of colon           | 1                      | 0                         | 0                          | 0                            | 0                      | 0                         | 0                          | 0                            |
| Hepatorenal failure               | 0                      | 1                         | 0                          | 0                            | 0                      | 0                         | 0                          | 0                            |
| Hemothorax                        | 0                      | 0                         | 0                          | 1                            | 0                      | 0                         | 0                          | 0                            |
| Overdose                          | 0                      | 0                         | 0                          | 0                            | 0                      | 0                         | 1                          | 0                            |
| Subarachnoid haemorrhage          | 0                      | 0                         | 0                          | 0                            | 0                      | 0                         | 1                          | 0                            |
| Acute hepatic failure             | 0                      | 0                         | 0                          | 0                            | 0                      | 0                         | 1                          | 0                            |
| <b>Week 0 to 52*</b>              |                        |                           |                            |                              |                        |                           |                            |                              |
| Any fatal SAE                     |                        | 2                         | 7                          | 3                            |                        | 5                         | 6                          | 2                            |
| COVID-19                          |                        | 0                         | 1                          | 1                            |                        | 0                         | 0                          | 0                            |
| COVID-19 pneumonia                |                        | 0                         | 1                          | 1                            |                        | 1                         | 2                          | 1                            |
| Pneumonia                         |                        | 0                         | 1                          | 0                            |                        | 0                         | 0                          | 0                            |
| Cardiac arrest                    |                        | 1                         | 0                          | 0                            |                        | 0                         | 0                          | 0                            |
| Colitis ischaemic                 |                        | 0                         | 1                          | 0                            |                        | 0                         | 0                          | 0                            |
| Circulatory collapse              |                        | 0                         | 1                          | 0                            |                        | 0                         | 0                          | 0                            |
| Death                             |                        | 0                         | 2                          | 0                            |                        | 1                         | 0                          | 0                            |
| Hepatorenal failure               |                        | 1                         | 0                          | 0                            |                        | 0                         | 0                          | 0                            |

|                          |  |   |   |   |  |   |   |   |
|--------------------------|--|---|---|---|--|---|---|---|
| Haemothorax              |  | 0 | 0 | 1 |  | 0 | 0 | 0 |
| Septic shock             |  | 0 | 0 | 0 |  | 0 | 0 | 1 |
| Lung neoplasm            |  | 0 | 0 | 0 |  | 1 | 0 | 0 |
| Subarachnoid haemorrhage |  | 0 | 0 | 0 |  | 1 | 1 | 0 |
| Acute abdomen            |  | 0 | 0 | 0 |  | 1 | 0 | 0 |
| Acute hepatic failure    |  | 0 | 0 | 0 |  | 0 | 1 | 0 |
| Sudden death             |  | 0 | 0 | 0 |  | 0 | 1 | 0 |
| Overdose <sup>†</sup>    |  | 0 | 0 | 0 |  | 0 | 1 | 0 |

Events listed according to the MedDRA Preferred Terms used for the coding of events reported by investigators. \*Data reported for patients who were randomised to active treatments from baseline; <sup>†</sup>Accidental overdose to a concomitant medication.

BID, twice daily; COVID-19, coronavirus disease 2019; MedDRA, Medical Dictionary for Regulatory Activities; QW, once weekly; SAE, serious adverse event.

**Supplementary Table 13.** Summary of laboratory parameters worst grade shift from baseline grade up to Week 52 in contRAst 1

| Number of patients (%)           | Maximum grade during time period |           |         |         |         |                            |           |         |         |         |                              |          |         |         |         |
|----------------------------------|----------------------------------|-----------|---------|---------|---------|----------------------------|-----------|---------|---------|---------|------------------------------|----------|---------|---------|---------|
|                                  | Otilimab 90mg QW<br>N=513        |           |         |         |         | Otilimab 150mg QW<br>N=510 |           |         |         |         | Tofacitinib 5mg BID<br>N=273 |          |         |         |         |
| Baseline grade                   | Grade 0                          | Grade 1   | Grade 2 | Grade 3 | Grade 4 | Grade 0                    | Grade 1   | Grade 2 | Grade 3 | Grade 4 | Grade 0                      | Grade 1  | Grade 2 | Grade 3 | Grade 4 |
| <b>ALT increased</b>             | n=509                            |           |         |         |         | n=508                      |           |         |         |         | n=273                        |          |         |         |         |
| Grade 0                          | 353 (69%)                        | 145 (28%) | 6 (1%)  | 5 (<1%) | 0       | 348 (69%)                  | 143 (28%) | 10 (2%) | 6 (1%)  | 1 (<1%) | 184 (67%)                    | 83 (30%) | 5 (2%)  | 1 (<1%) | 0       |
| Grade 1                          | 0                                | 0         | 0       | 0       | 0       | 0                          | 0         | 0       | 0       | 0       | 0                            | 0        | 0       | 0       | 0       |
| Grade 2                          | 0                                | 0         | 0       | 0       | 0       | 0                          | 0         | 0       | 0       | 0       | 0                            | 0        | 0       | 0       | 0       |
| Grade 3                          | 0                                | 0         | 0       | 0       | 0       | 0                          | 0         | 0       | 0       | 0       | 0                            | 0        | 0       | 0       | 0       |
| Grade 4                          | 0                                | 0         | 0       | 0       | 0       | 0                          | 0         | 0       | 0       | 0       | 0                            | 0        | 0       | 0       | 0       |
| <b>ALP increased</b>             | n=509                            |           |         |         |         | n=508                      |           |         |         |         | n=273                        |          |         |         |         |
| Grade 0                          | 411 (81%)                        | 96 (19%)  | 2 (<1%) | 0       | 0       | 406 (80%)                  | 101 (20%) | 1 (<1%) | 0       | 0       | 228 (84%)                    | 44 (16%) | 1 (<1%) | 0       | 0       |
| Grade 1                          | 0                                | 0         | 0       | 0       | 0       | 0                          | 0         | 0       | 0       | 0       | 0                            | 0        | 0       | 0       | 0       |
| Grade 2                          | 0                                | 0         | 0       | 0       | 0       | 0                          | 0         | 0       | 0       | 0       | 0                            | 0        | 0       | 0       | 0       |
| Grade 3                          | 0                                | 0         | 0       | 0       | 0       | 0                          | 0         | 0       | 0       | 0       | 0                            | 0        | 0       | 0       | 0       |
| Grade 4                          | 0                                | 0         | 0       | 0       | 0       | 0                          | 0         | 0       | 0       | 0       | 0                            | 0        | 0       | 0       | 0       |
| <b>AST increased</b>             | n=509                            |           |         |         |         | n=508                      |           |         |         |         | n=273                        |          |         |         |         |
| Grade 0                          | 383 (75%)                        | 119 (23%) | 7 (1%)  | 0       | 0       | 357 (70%)                  | 140 (28%) | 6 (1%)  | 5 (<1%) | 0       | 186 (68%)                    | 83 (30%) | 2 (<1%) | 1 (<1%) | 1 (<1%) |
| Grade 1                          | 0                                | 0         | 0       | 0       | 0       | 0                          | 0         | 0       | 0       | 0       | 0                            | 0        | 0       | 0       | 0       |
| Grade 2                          | 0                                | 0         | 0       | 0       | 0       | 0                          | 0         | 0       | 0       | 0       | 0                            | 0        | 0       | 0       | 0       |
| Grade 3                          | 0                                | 0         | 0       | 0       | 0       | 0                          | 0         | 0       | 0       | 0       | 0                            | 0        | 0       | 0       | 0       |
| Grade 4                          | 0                                | 0         | 0       | 0       | 0       | 0                          | 0         | 0       | 0       | 0       | 0                            | 0        | 0       | 0       | 0       |
| <b>Blood bilirubin increased</b> | n=509                            |           |         |         |         | n=508                      |           |         |         |         | n=273                        |          |         |         |         |
| Grade 0                          | 499 (98%)                        | 7 (1%)    | 2 (<1%) | 0       | 0       | 496 (98%)                  | 9 (2%)    | 1 (<1%) | 1 (<1%) | 0       | 255 (93%)                    | 15 (5%)  | 0       | 0       | 0       |
| Grade 1                          | 0                                | 0         | 0       | 0       | 0       | 0                          | 0         | 0       | 0       | 0       | 0                            | 0        | 0       | 0       | 0       |
| Grade 2                          | 0                                | 0         | 0       | 0       | 0       | 0                          | 0         | 0       | 0       | 0       | 0                            | 0        | 0       | 0       | 0       |

| Number of patients (%)          | Maximum grade during time period |           |         |         |         |                            |           |         |         |         |                              |           |         |         |         |
|---------------------------------|----------------------------------|-----------|---------|---------|---------|----------------------------|-----------|---------|---------|---------|------------------------------|-----------|---------|---------|---------|
|                                 | Otilimab 90mg QW<br>N=513        |           |         |         |         | Otilimab 150mg QW<br>N=510 |           |         |         |         | Tofacitinib 5mg BID<br>N=273 |           |         |         |         |
| Baseline grade                  | Grade 0                          | Grade 1   | Grade 2 | Grade 3 | Grade 4 | Grade 0                    | Grade 1   | Grade 2 | Grade 3 | Grade 4 | Grade 0                      | Grade 1   | Grade 2 | Grade 3 | Grade 4 |
| Grade 3                         | 0                                | 0         | 0       | 0       | 0       | 0                          | 0         | 0       | 0       | 0       | 0                            | 0         | 0       | 0       | 0       |
| Grade 4                         | 0                                | 0         | 0       | 0       | 0       | 0                          | 0         | 0       | 0       | 0       | 0                            | 0         | 0       | 0       | 0       |
| <b>Total Cholesterol (High)</b> | <b>n=503</b>                     |           |         |         |         | <b>n=504</b>               |           |         |         |         | <b>n=266</b>                 |           |         |         |         |
| Grade 0                         | 167 (33%)                        | 105 (21%) | 1 (<1%) | 0       | 0       | 171 (34%)                  | 126 (25%) | 1 (<1%) | 0       | 0       | 64 (24%)                     | 82 (31%)  | 1 (<1%) | 0       | 0       |
| Grade 1                         | 18 (4%)                          | 198 (39%) | 9 (2%)  | 0       | 0       | 19 (4%)                    | 177 (35%) | 6 (1%)  | 1 (<1%) | 0       | 1 (<1%)                      | 107 (40%) | 10 (4%) | 0       | 0       |
| Grade 2                         | 0                                | 1 (<1%)   | 4 (<1%) | 0       | 0       | 0                          | 3 (<1%)   | 0       | 0       | 0       | 0                            | 0         | 1 (<1%) | 0       | 0       |
| Grade 3                         | 0                                | 0         | 0       | 0       | 0       | 0                          | 0         | 0       | 0       | 0       | 0                            | 0         | 0       | 0       | 0       |
| Grade 4                         | 0                                | 0         | 0       | 0       | 0       | 0                          | 0         | 0       | 0       | 0       | 0                            | 0         | 0       | 0       | 0       |
| <b>Haemoglobin decreased</b>    | <b>n=509</b>                     |           |         |         |         | <b>n=508</b>               |           |         |         |         | <b>n=273</b>                 |           |         |         |         |
| Grade 0                         | 241 (47%)                        | 110 (22%) | 7 (1%)  | 0       | 0       | 242 (48%)                  | 112 (22%) | 2 (<1%) | 0       | 0       | 144 (53%)                    | 46 (17%)  | 0       | 0       | 0       |
| Grade 1                         | 4 (<1%)                          | 88 (17%)  | 31 (6%) | 1 (<1%) | 0       | 4 (<1%)                    | 88 (17%)  | 19 (4%) | 1 (<1%) | 0       | 2 (<1%)                      | 57 (21%)  | 10 (4%) | 0       | 0       |
| Grade 2                         | 0                                | 0         | 14 (3%) | 1 (<1%) | 0       | 0                          | 4 (<1%)   | 14 (3%) | 3 (<1%) | 0       | 0                            | 2 (<1%)   | 7 (3%)  | 1 (<1%) | 0       |
| Grade 3                         | 0                                | 0         | 0       | 0       | 0       | 0                          | 1 (<1%)   | 1 (<1%) | 0       | 0       | 0                            | 0         | 0       | 0       | 0       |
| Grade 4                         | 0                                | 0         | 0       | 0       | 0       | 0                          | 0         | 0       | 0       | 0       | 0                            | 0         | 0       | 0       | 0       |
| <b>Haemoglobin increased</b>    | <b>n=509</b>                     |           |         |         |         | <b>n=508</b>               |           |         |         |         | <b>n=273</b>                 |           |         |         |         |
| Grade 0                         | 241 (47%)                        | 10 (2%)   | 0       | 0       | 0       | 242 (48%)                  | 10 (2%)   | 0       | 0       | 0       | 144 (53%)                    | 3 (1%)    | 0       | 0       | 0       |
| Grade 1                         | 1 (<1%)                          | 1 (<1%)   | 0       | 0       | 0       | 2 (<1%)                    | 5 (<1%)   | 0       | 0       | 0       | 0                            | 1 (<1%)   | 0       | 0       | 0       |
| Grade 2                         | 0                                | 0         | 0       | 0       | 0       | 0                          | 0         | 0       | 0       | 0       | 0                            | 0         | 0       | 0       | 0       |
| Grade 3                         | 0                                | 0         | 0       | 0       | 0       | 0                          | 0         | 0       | 0       | 0       | 0                            | 0         | 0       | 0       | 0       |
| Grade 4                         | 0                                | 0         | 0       | 0       | 0       | 0                          | 0         | 0       | 0       | 0       | 0                            | 0         | 0       | 0       | 0       |
| <b>Leukocytes decreased</b>     | <b>n=509</b>                     |           |         |         |         | <b>n=508</b>               |           |         |         |         | <b>n=273</b>                 |           |         |         |         |
| Grade 0                         | 460 (90%)                        | 32 (6%)   | 9 (2%)  | 1 (<1%) | 0       | 443 (87%)                  | 36 (7%)   | 19 (4%) | 1 (<1%) | 0       | 246 (90%)                    | 17 (6%)   | 6 (2%)  | 0       | 0       |

| Number of patients (%)            | Maximum grade during time period |         |         |         |         |                            |         |         |         |         |                              |         |         |         |         |
|-----------------------------------|----------------------------------|---------|---------|---------|---------|----------------------------|---------|---------|---------|---------|------------------------------|---------|---------|---------|---------|
|                                   | Otilimab 90mg QW<br>N=513        |         |         |         |         | Otilimab 150mg QW<br>N=510 |         |         |         |         | Tofacitinib 5mg BID<br>N=273 |         |         |         |         |
| Baseline grade                    | Grade 0                          | Grade 1 | Grade 2 | Grade 3 | Grade 4 | Grade 0                    | Grade 1 | Grade 2 | Grade 3 | Grade 4 | Grade 0                      | Grade 1 | Grade 2 | Grade 3 | Grade 4 |
| Grade 1                           | 2 (<1%)                          | 0       | 4 (<1%) | 0       | 0       | 2 (<1%)                    | 3 (<1%) | 3 (<1%) | 0       | 0       | 1 (<1%)                      | 1 (<1%) | 0       | 0       | 0       |
| Grade 2                           | 0                                | 0       | 1 (<1%) | 0       | 0       | 0                          | 1 (<1%) | 0       | 0       | 0       | 0                            | 0       | 2 (<1%) | 0       | 0       |
| Grade 3                           | 0                                | 0       | 0       | 0       | 0       | 0                          | 0       | 0       | 0       | 0       | 0                            | 0       | 0       | 0       | 0       |
| Grade 4                           | 0                                | 0       | 0       | 0       | 0       | 0                          | 0       | 0       | 0       | 0       | 0                            | 0       | 0       | 0       | 0       |
| <b>Neutrophil count decreased</b> | <b>n=509</b>                     |         |         |         |         | <b>n=508</b>               |         |         |         |         | <b>n=273</b>                 |         |         |         |         |
| Grade 0                           | 466 (92%)                        | 25 (5%) | 10 (2%) | 2 (<1%) | 1 (<1%) | 446 (88%)                  | 22 (4%) | 24 (5%) | 5 (<1%) | 2 (<1%) | 242 (89%)                    | 13 (5%) | 12 (4%) | 0       | 1 (<1%) |
| Grade 1                           | 1 (<1%)                          | 0       | 0       | 2 (<1%) | 0       | 0                          | 0       | 2 (<1%) | 1 (<1%) | 1 (<1%) | 1 (<1%)                      | 1 (<1%) | 1 (<1%) | 0       | 0       |
| Grade 2                           | 0                                | 0       | 0       | 0       | 1 (<1%) | 1 (<1%)                    | 0       | 2 (<1%) | 0       | 0       | 0                            | 1 (<1%) | 1 (<1%) | 0       | 0       |
| Grade 3                           | 0                                | 0       | 0       | 0       | 0       | 0                          | 1 (<1%) | 1 (<1%) | 0       | 0       | 0                            | 0       | 0       | 0       | 0       |
| Grade 4                           | 1 (<1%)                          | 0       | 0       | 0       | 0       | 0                          | 0       | 0       | 0       | 0       | 0                            | 0       | 0       | 0       | 0       |
| <b>Platelet count decreased</b>   | <b>n=509</b>                     |         |         |         |         | <b>n=508</b>               |         |         |         |         | <b>n=273</b>                 |         |         |         |         |
| Grade 0                           | 497 (98%)                        | 7 (1%)  | 0       | 0       | 0       | 500 (98%)                  | 7 (1%)  | 0       | 0       | 0       | 268 (98%)                    | 4 (1%)  | 0       | 0       | 1 (<1%) |
| Grade 1                           | 1 (<1%)                          | 1 (<1%) | 2 (<1%) | 1 (<1%) | 0       | 0                          | 1 (<1%) | 0       | 0       | 0       | 0                            | 0       | 0       | 0       | 0       |
| Grade 2                           | 0                                | 0       | 0       | 0       | 0       | 0                          | 0       | 0       | 0       | 0       | 0                            | 0       | 0       | 0       | 0       |
| Grade 3                           | 0                                | 0       | 0       | 0       | 0       | 0                          | 0       | 0       | 0       | 0       | 0                            | 0       | 0       | 0       | 0       |
| Grade 4                           | 0                                | 0       | 0       | 0       | 0       | 0                          | 0       | 0       | 0       | 0       | 0                            | 0       | 0       | 0       | 0       |

**Supplementary Table 14.** Summary of laboratory parameters worst grade shift from baseline grade up to Week 52 in contRAst 2

| Number of patients (%)           | Maximum grade during time period |           |         |         |         |                            |           |         |         |         |                              |          |         |         |         |
|----------------------------------|----------------------------------|-----------|---------|---------|---------|----------------------------|-----------|---------|---------|---------|------------------------------|----------|---------|---------|---------|
|                                  | Otilimab 90mg QW<br>N=545        |           |         |         |         | Otilimab 150mg QW<br>N=539 |           |         |         |         | Tofacitinib 5mg BID<br>N=286 |          |         |         |         |
| Baseline grade                   | Grade 0                          | Grade 1   | Grade 2 | Grade 3 | Grade 4 | Grade 0                    | Grade 1   | Grade 2 | Grade 3 | Grade 4 | Grade 0                      | Grade 1  | Grade 2 | Grade 3 | Grade 4 |
| <b>ALT increased</b>             | n=541                            |           |         |         |         | n=536                      |           |         |         |         | n=282                        |          |         |         |         |
| Grade 0                          | 425 (79%)                        | 101 (19%) | 11 (2%) | 4 (<1%) | 0       | 410 (76%)                  | 108 (20%) | 11 (2%) | 5 (<1%) | 2 (<1%) | 189 (67%)                    | 84 (30%) | 5 (2%)  | 4 (1%)  | 0       |
| Grade 1                          | 0                                | 0         | 0       | 0       | 0       | 0                          | 0         | 0       | 0       | 0       | 0                            | 0        | 0       | 0       | 0       |
| Grade 2                          | 0                                | 0         | 0       | 0       | 0       | 0                          | 0         | 0       | 0       | 0       | 0                            | 0        | 0       | 0       | 0       |
| Grade 3                          | 0                                | 0         | 0       | 0       | 0       | 0                          | 0         | 0       | 0       | 0       | 0                            | 0        | 0       | 0       | 0       |
| Grade 4                          | 0                                | 0         | 0       | 0       | 0       | 0                          | 0         | 0       | 0       | 0       | 0                            | 0        | 0       | 0       | 0       |
| <b>ALP increased</b>             | n=541                            |           |         |         |         | n=536                      |           |         |         |         | n=282                        |          |         |         |         |
| Grade 0                          | 532 (98%)                        | 8 (1%)    | 1 (<1%) | 0       | 0       | 526 (98%)                  | 9 (2%)    | 1 (<1%) | 0       | 0       | 279 (99%)                    | 2 (<1%)  | 1 (<1%) | 0       | 0       |
| Grade 1                          | 0                                | 0         | 0       | 0       | 0       | 0                          | 0         | 0       | 0       | 0       | 0                            | 0        | 0       | 0       | 0       |
| Grade 2                          | 0                                | 0         | 0       | 0       | 0       | 0                          | 0         | 0       | 0       | 0       | 0                            | 0        | 0       | 0       | 0       |
| Grade 3                          | 0                                | 0         | 0       | 0       | 0       | 0                          | 0         | 0       | 0       | 0       | 0                            | 0        | 0       | 0       | 0       |
| Grade 4                          | 0                                | 0         | 0       | 0       | 0       | 0                          | 0         | 0       | 0       | 0       | 0                            | 0        | 0       | 0       | 0       |
| <b>AST increased</b>             | n=541                            |           |         |         |         | n=536                      |           |         |         |         | n=282                        |          |         |         |         |
| Grade 0                          | 443 (82%)                        | 90 (17%)  | 6 (1%)  | 2 (<1%) | 0       | 422 (79%)                  | 104 (19%) | 5 (<1%) | 3 (<1%) | 2 (<1%) | 205 (73%)                    | 72 (26%) | 4 (1%)  | 1 (<1%) | 0       |
| Grade 1                          | 0                                | 0         | 0       | 0       | 0       | 0                          | 0         | 0       | 0       | 0       | 0                            | 0        | 0       | 0       | 0       |
| Grade 2                          | 0                                | 0         | 0       | 0       | 0       | 0                          | 0         | 0       | 0       | 0       | 0                            | 0        | 0       | 0       | 0       |
| Grade 3                          | 0                                | 0         | 0       | 0       | 0       | 0                          | 0         | 0       | 0       | 0       | 0                            | 0        | 0       | 0       | 0       |
| Grade 4                          | 0                                | 0         | 0       | 0       | 0       | 0                          | 0         | 0       | 0       | 0       | 0                            | 0        | 0       | 0       | 0       |
| <b>Blood bilirubin increased</b> | n=541                            |           |         |         |         | n=536                      |           |         |         |         | n=282                        |          |         |         |         |
| Grade 0                          | 531 (98%)                        | 6 (1%)    | 1 (<1%) | 0       | 0       | 527 (98%)                  | 6 (1%)    | 1 (<1%) | 0       | 0       | 278 (99%)                    | 2 (<1%)  | 1 (<1%) | 0       | 0       |
| Grade 1                          | 0                                | 1 (<1%)   | 1 (<1%) | 0       | 0       | 1 (<1%)                    | 1 (<1%)   | 0       | 0       | 0       | 0                            | 1 (<1%)  | 0       | 0       | 0       |
| Grade 2                          | 0                                | 0         | 0       | 0       | 0       | 0                          | 0         | 0       | 0       | 0       | 0                            | 0        | 0       | 0       | 0       |

| Number of patients (%)          | Maximum grade during time period |           |         |         |         |                            |           |         |         |         |                              |          |         |         |         |
|---------------------------------|----------------------------------|-----------|---------|---------|---------|----------------------------|-----------|---------|---------|---------|------------------------------|----------|---------|---------|---------|
|                                 | Otilimab 90mg QW<br>N=545        |           |         |         |         | Otilimab 150mg QW<br>N=539 |           |         |         |         | Tofacitinib 5mg BID<br>N=286 |          |         |         |         |
| Baseline grade                  | Grade 0                          | Grade 1   | Grade 2 | Grade 3 | Grade 4 | Grade 0                    | Grade 1   | Grade 2 | Grade 3 | Grade 4 | Grade 0                      | Grade 1  | Grade 2 | Grade 3 | Grade 4 |
| Grade 3                         | 0                                | 0         | 0       | 0       | 0       | 0                          | 0         | 0       | 0       | 0       | 0                            | 0        | 0       | 0       | 0       |
| Grade 4                         | 0                                | 0         | 0       | 0       | 0       | 0                          | 0         | 0       | 0       | 0       | 0                            | 0        | 0       | 0       | 0       |
| <b>Total cholesterol (high)</b> | <b>n=537</b>                     |           |         |         |         | <b>n=533</b>               |           |         |         |         | <b>n=281</b>                 |          |         |         |         |
| Grade 0                         | 231 (43%)                        | 108 (20%) | 1 (<1%) | 0       | 0       | 225 (42%)                  | 109 (20%) | 0       | 0       | 0       | 85 (30%)                     | 87 (31%) | 0       | 0       | 0       |
| Grade 1                         | 21 (4%)                          | 163 (30%) | 9 (2%)  | 0       | 0       | 21 (4%)                    | 159 (30%) | 17 (3%) | 0       | 0       | 4 (1%)                       | 89 (32%) | 14 (5%) | 0       | 0       |
| Grade 2                         | 0                                | 1 (<1%)   | 3 (<1%) | 0       | 0       | 0                          | 0         | 2 (<1%) | 0       | 0       | 0                            | 2 (<1%)  | 0       | 0       | 0       |
| Grade 3                         | 0                                | 0         | 0       | 0       | 0       | 0                          | 0         | 0       | 0       | 0       | 0                            | 0        | 0       | 0       | 0       |
| Grade 4                         | 0                                | 0         | 0       | 0       | 0       | 0                          | 0         | 0       | 0       | 0       | 0                            | 0        | 0       | 0       | 0       |
| <b>Haemoglobin decreased</b>    | <b>n=540</b>                     |           |         |         |         | <b>n=536</b>               |           |         |         |         | <b>n=282</b>                 |          |         |         |         |
| Grade 0                         | 243 (45%)                        | 99 (18%)  | 6 (1%)  | 0       | 0       | 264 (49%)                  | 102 (19%) | 7 (1%)  | 1 (<1%) | 0       | 144 (51%)                    | 45 (16%) | 5 (2%)  | 1 (<1%) | 0       |
| Grade 1                         | 6 (1%)                           | 128 (24%) | 28 (5%) | 0       | 0       | 7 (1%)                     | 107 (20%) | 13 (2%) | 0       | 0       | 4 (1%)                       | 58 (21%) | 5 (2%)  | 1 (<1%) | 0       |
| Grade 2                         | 0                                | 0         | 12 (2%) | 3 (<1%) | 0       | 0                          | 2 (<1%)   | 10 (2%) | 4 (<1%) | 0       | 0                            | 2 (<1%)  | 4 (1%)  | 0       | 0       |
| Grade 3                         | 0                                | 0         | 0       | 0       | 0       | 0                          | 0         | 0       | 0       | 0       | 0                            | 0        | 0       | 0       | 0       |
| Grade 4                         | 0                                | 0         | 0       | 0       | 0       | 0                          | 0         | 0       | 0       | 0       | 0                            | 0        | 0       | 0       | 0       |
| <b>Haemoglobin increased</b>    | <b>n=540</b>                     |           |         |         |         | <b>n=536</b>               |           |         |         |         | <b>n=282</b>                 |          |         |         |         |
| Grade 0                         | 243 (45%)                        | 8 (1%)    | 0       | 1 (<1%) | 0       | 264 (49%)                  | 15 (3%)   | 1 (<1%) | 0       | 0       | 144 (51%)                    | 9 (3%)   | 0       | 0       | 0       |
| Grade 1                         | 0                                | 7 (1%)    | 0       | 0       | 0       | 1 (<1%)                    | 2 (<1%)   | 0       | 0       | 0       | 1 (<1%)                      | 3 (1%)   | 0       | 0       | 0       |
| Grade 2                         | 0                                | 0         | 0       | 0       | 0       | 0                          | 0         | 0       | 0       | 0       | 0                            | 0        | 0       | 0       | 0       |
| Grade 3                         | 0                                | 0         | 0       | 0       | 0       | 0                          | 0         | 0       | 0       | 0       | 0                            | 0        | 0       | 0       | 0       |
| Grade 4                         | 0                                | 0         | 0       | 0       | 0       | 0                          | 0         | 0       | 0       | 0       | 0                            | 0        | 0       | 0       | 0       |
| <b>Leukocytes decreased</b>     | <b>n=540</b>                     |           |         |         |         | <b>n=536</b>               |           |         |         |         | <b>n=282</b>                 |          |         |         |         |
| Grade 0                         | 469 (87%)                        | 53 (10%)  | 9 (2%)  | 1 (<1%) | 0       | 487 (91%)                  | 38 (7%)   | 8 (1%)  | 0       | 0       | 245 (87%)                    | 26 (9%)  | 5 (2%)  | 0       | 0       |

| Number of patients (%)            | Maximum grade during time period |         |         |         |         |                            |         |         |         |         |                              |         |         |         |         |
|-----------------------------------|----------------------------------|---------|---------|---------|---------|----------------------------|---------|---------|---------|---------|------------------------------|---------|---------|---------|---------|
|                                   | Otilimab 90mg QW<br>N=545        |         |         |         |         | Otilimab 150mg QW<br>N=539 |         |         |         |         | Tofacitinib 5mg BID<br>N=286 |         |         |         |         |
| Baseline grade                    | Grade 0                          | Grade 1 | Grade 2 | Grade 3 | Grade 4 | Grade 0                    | Grade 1 | Grade 2 | Grade 3 | Grade 4 | Grade 0                      | Grade 1 | Grade 2 | Grade 3 | Grade 4 |
| Grade 1                           | 1 (<1%)                          | 3 (<1%) | 3 (<1%) | 1 (<1%) | 0       | 0                          | 2 (<1%) | 1 (<1%) | 0       | 0       | 1 (<1%)                      | 2 (<1%) | 2 (<1%) | 0       | 0       |
| Grade 2                           | 0                                | 0       | 0       | 0       | 0       | 0                          | 0       | 0       | 0       | 0       | 0                            | 1 (<1%) | 0       | 0       | 0       |
| Grade 3                           | 0                                | 0       | 0       | 0       | 0       | 0                          | 0       | 0       | 0       | 0       | 0                            | 0       | 0       | 0       | 0       |
| Grade 4                           | 0                                | 0       | 0       | 0       | 0       | 0                          | 0       | 0       | 0       | 0       | 0                            | 0       | 0       | 0       | 0       |
| <b>Neutrophil count decreased</b> | <b>n=540</b>                     |         |         |         |         | <b>n=536</b>               |         |         |         |         | <b>n=282</b>                 |         |         |         |         |
| Grade 0                           | 498 (92%)                        | 16 (3%) | 17 (3%) | 3 (<1%) | 1 (<1%) | 501 (93%)                  | 19 (4%) | 12 (2%) | 3 (<1%) | 1 (<1%) | 248 (88%)                    | 20 (7%) | 10 (4%) | 2 (<1%) | 0       |
| Grade 1                           | 0                                | 2 (<1%) | 1 (<1%) | 0       | 0       | 0                          | 0       | 0       | 0       | 0       | 1 (<1%)                      | 0       | 0       | 0       | 0       |
| Grade 2                           | 0                                | 1 (<1%) | 0       | 0       | 1 (<1%) | 0                          | 0       | 0       | 0       | 0       | 0                            | 0       | 1 (<1%) | 0       | 0       |
| Grade 3                           | 0                                | 0       | 0       | 0       | 0       | 0                          | 0       | 0       | 0       | 0       | 0                            | 0       | 0       | 0       | 0       |
| Grade 4                           | 0                                | 0       | 0       | 0       | 0       | 0                          | 0       | 0       | 0       | 0       | 0                            | 0       | 0       | 0       | 0       |
| <b>Platelet count decreased</b>   | <b>n=540</b>                     |         |         |         |         | <b>n=536</b>               |         |         |         |         | <b>n=282</b>                 |         |         |         |         |
| Grade 0                           | 528 (98%)                        | 9 (2%)  | 0       | 0       | 0       | 520 (97%)                  | 14 (3%) | 1 (<1%) | 0       | 0       | 275 (98%)                    | 6 (2%)  | 0       | 0       | 0       |
| Grade 1                           | 0                                | 3 (<1%) | 0       | 0       | 0       | 0                          | 1 (<1%) | 0       | 0       | 0       | 0                            | 1 (<1%) | 0       | 0       | 0       |
| Grade 2                           | 0                                | 0       | 0       | 0       | 0       | 0                          | 0       | 0       | 0       | 0       | 0                            | 0       | 0       | 0       | 0       |
| Grade 3                           | 0                                | 0       | 0       | 0       | 0       | 0                          | 0       | 0       | 0       | 0       | 0                            | 0       | 0       | 0       | 0       |
| Grade 4                           | 0                                | 0       | 0       | 0       | 0       | 0                          | 0       | 0       | 0       | 0       | 0                            | 0       | 0       | 0       | 0       |
